# Supplementary material for: Diphenyl Diselenide and SARS-CoV-2: in silico Exploration of the Mechanisms of Inhibition of Main Protease (Mpro) and Papain-like Protease (PLpro)
Source: PubMed Central journal article supplement (PMC10091420; doi:10.1021/acs.jcim.3c00168), 2023-03-23
Supplement: ci3c00168_si_001.pdf [file ci3c00168_si_001.pdf]

# Supporting Information

## **Diphenyl diselenide and SARS-CoV-2: *in silico* exploration of the mechanisms of inhibition of Main protease (M<sup>pro</sup>) and Papain-like protease (PL<sup>pro</sup>)**

Folorunsho Bright Omege<sup>1</sup>, Andrea Madabeni<sup>2</sup>, Amanda Resende Tucci<sup>3,4</sup>, Pablo Andrei Nogara<sup>1</sup>, Marco Bortoli<sup>5</sup>, Alice dos Santos Rosa<sup>3,4</sup>, Vivian Neuza dos Santos Ferreira<sup>3,4</sup>, Joao Batista Teixeira Rocha<sup>1</sup>, Milene Dias Miranda<sup>3,4</sup>, \* Laura Orian<sup>2\*</sup>

<sup>1</sup> Departamento de Bioquímica e Biologia Molecular, Universidade Federal de Santa Maria, Santa Maria RS 97105-900, Brazil.

<sup>2</sup> Dipartimento di Scienze Chimiche, Università degli Studi di Padova, Via Marzolo 1, 35131 Padova, Italy

<sup>3</sup> Laboratório de Vírus Respiratórios e do Sarampo, Instituto Oswaldo Cruz, Fundação Oswaldo Cruz RJ 21041-210, Brazil

<sup>4</sup> Laboratório de Morfologia e Morfogênese Viral, Instituto Oswaldo Cruz, Fundação Oswaldo Cruz RJ 21041-210, Brazil

<sup>5</sup> Institute of Computational Chemistry and Catalysis (IQCC) and Department of Chemistry, Faculty of Sciences, University of Girona, C/M. A. Capmany 69, 17003 Girona, Spain.

\*Correspondence: [laura.orian@unipd.it](mailto:laura.orian@unipd.it) (L.O.); [mmiranda@ioc.fiocruz.br](mailto:mmiranda@ioc.fiocruz.br) (M.D.M.)

**Table S1** Force field parameters for (PhSe)<sub>2</sub> taken from *J. Phys. Chem. A* **2016**, 120, 25, 4389–4400. Values are reported in AMBER unit of measure (see <https://ambermd.org/FileFormats.php#parm.dat> for a full specification of the different terms).

| bonds           |       | angles          |       |       | dihedrals         |                   |                   |                   |       |
|-----------------|-------|-----------------|-------|-------|-------------------|-------------------|-------------------|-------------------|-------|
| r <sub>eq</sub> | RK    | θ <sub>eq</sub> | TK    | IDIVF | PK <sub>1/2</sub> | PK <sub>2/2</sub> | PK <sub>3/2</sub> | PK <sub>4/2</sub> | PHASE |
| Se-Se           |       | Se-Se-C         |       |       |                   | C-Se-Se-C         |                   |                   |       |
| 2.33            | 109   | 104.53          | 67.14 | 1     | -1.8498           | -1.6208           | -0.6648           | 0.0015            | 180   |
| Se-C            |       | Se-C-C          |       |       |                   | Se-Se-C-C         |                   |                   |       |
| 1.948           | 143.4 | 124.14          | 86.16 | 1     | 2.5629            | 0.2734            | 0.8091            | 0.0679            | 180   |
| C-C             |       | C-C-C           |       |       |                   | Se/C-C-C-C        |                   |                   |       |
| 1.387           | 478.4 | 119.97          | 67.18 |       |                   | Se/C/H-C-C-H      |                   |                   |       |
| C-H             |       | C-C-C           |       | 4     |                   | 14.5              |                   |                   | 180   |
| 1.087           | 344.3 | 120.01          | 48.46 |       |                   |                   |                   |                   |       |

**Table S2:** PES Scan. Bond distances of the chalcogens, constrained in the TCI as starting structure for TS guess search for the S-Se bond formation and the Se-Se bond breaking. Level of Theory: B3LYP/6-311G(d,p),ccPVTZ

|                                                                                     |       |       |       |       |       |       |       |       |       |       |       |       |       |       |       |       |       |       |       |       |       |       |       |       |       |       |
|-------------------------------------------------------------------------------------|-------|-------|-------|-------|-------|-------|-------|-------|-------|-------|-------|-------|-------|-------|-------|-------|-------|-------|-------|-------|-------|-------|-------|-------|-------|-------|
| 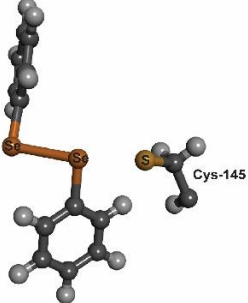 | TCI   | 1     | 2     | 3     | 4     | 5     | 6     | 7     | 8     | 9     | 10    | 11    | 12    | 13    | 14    | 15    | 16    | 17    | 18    | 19    | 20    | 21    | 22    | 23    | 24    | 25    |
|                                                                                     | S-Se  | 2.615 | 2.715 | 2.815 | 2.915 | 3.015 | 3.115 | 3.215 | 3.315 | 3.415 | 3.515 | 3.615 |       |       |       |       |       |       |       |       |       |       |       |       |       |       |
| Se-Se                                                                               | 2.686 | 2.790 | 2.890 | 2.990 | 3.090 | 3.190 | 3.290 | 3.390 | 3.490 | 3.590 | 3.690 | 3.790 | 3.890 | 3.990 | 4.090 | 4.190 | 4.290 | 4.390 | 4.490 | 4.590 | 4.690 | 4.790 | 4.890 | 4.990 | 5.090 | 5.190 |

**A**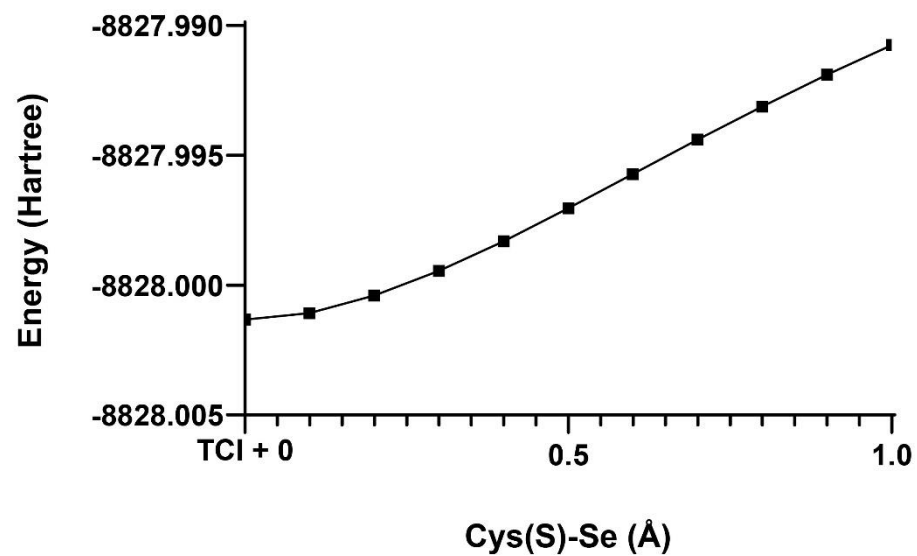**B**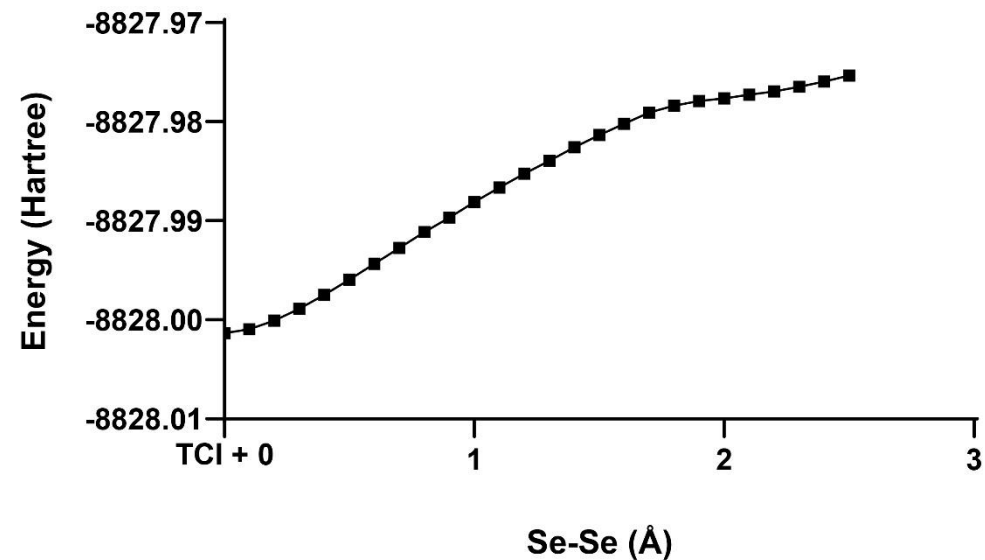

**Figure S1.** Plot of PES scan starting from TCI coordinate. (A) The TCI S-Se bond distance of 2.61 Å extended at 0.1 Å in 10 steps (B) TCI Se-Se bond distance of 2.69 Å extended at 0.1 Å in 25 steps. Level of Theory: B3LYP/6-311G(d,p),ccPVTZ

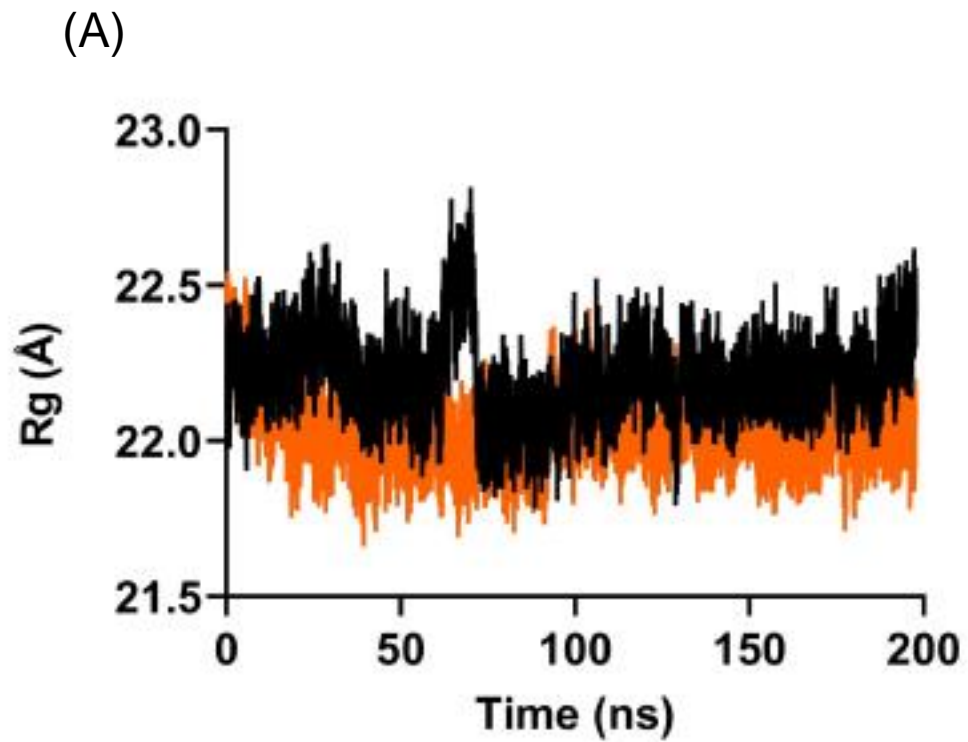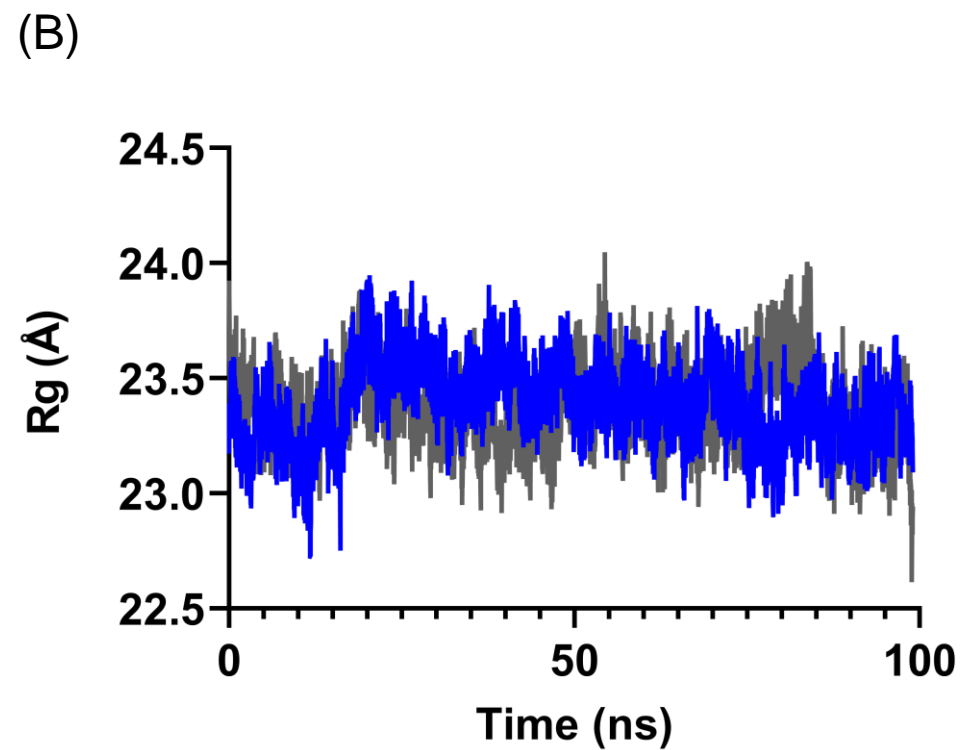

**Figure S2.** (A) Radius of Gyration for Mpro Apo (black) and PhSe<sub>2</sub>-M<sup>Pro</sup>(orange) (B) Radius of gyration for (PhSe)<sub>2</sub> bound PLpro (blue) and Apo (grey).

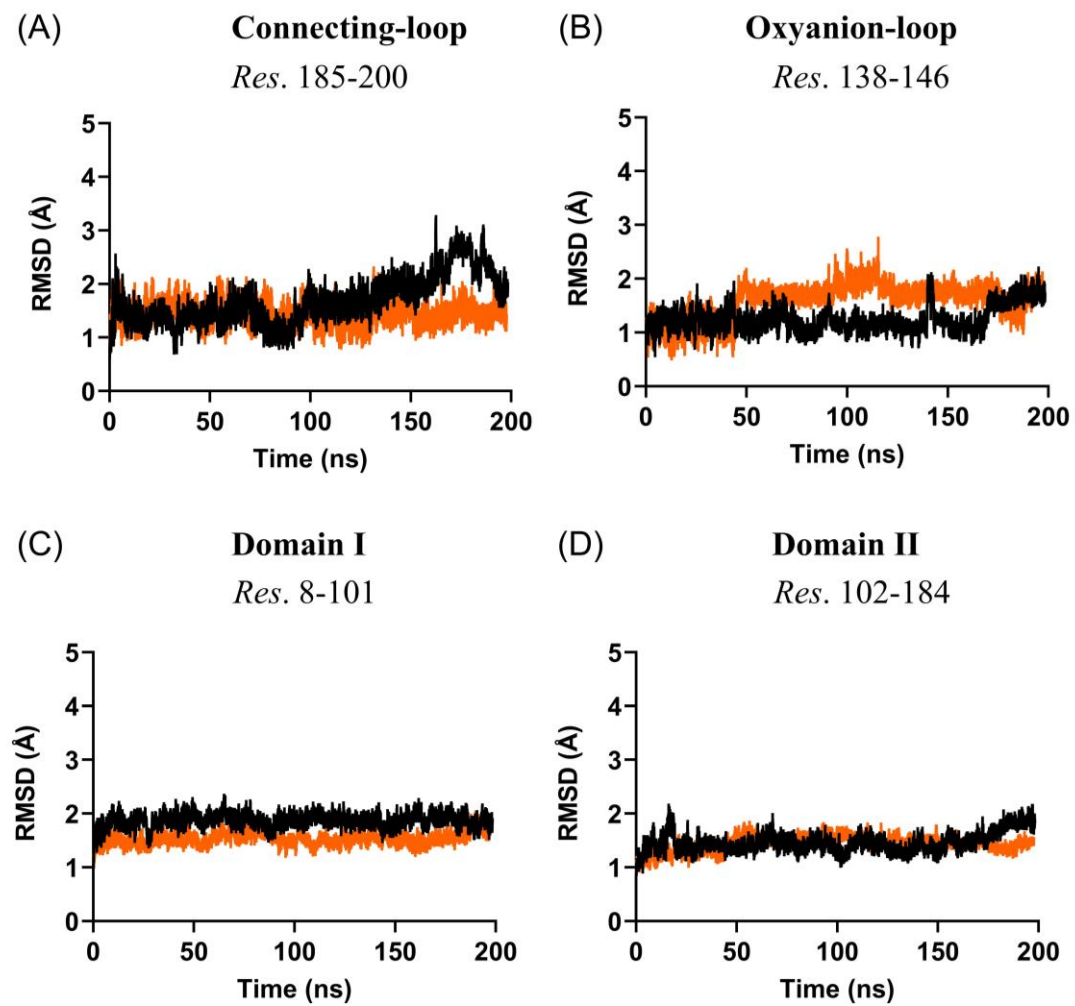

**Figure S3.** RMSD plots of the (A) Connecting-loop (B) Oxyanion-loop (C) Domain I and (D) Domain II. The average RMSD of  $(\text{PhSe})_2 + \text{M}^{\text{pro}}$  is represented in orange and the Apo structure in black.

**Table S3:** Model reaction for the neutral reaction:  $(\text{PhSe})_2 + \text{H-Cys} \longrightarrow \text{PhSe-SCys} + \text{PhSeH}$ . Level of theory: SMD-B3LYP-D3(BJ)/6-311G(d,p),ccPVTZ. $\Delta_{\text{rxn}}$ , in  $\text{kcal mol}^{-1}$ , is the classical reaction energy. Electronic ( $E_{\text{Elect}_{298}}$ ) energies and Gibb's ( $G_{\text{Gibbs}_{298}}$ ) free energies were measured at 298K

| Method                   | Phase        | Type of Energy       | E(PhSe) <sub>2</sub> | E(CysS-H)    | E(PhSe-SCys) | E(PhSeH)     | $\Delta_{\text{rxn}}$ ( $\text{kcal mol}^{-1}$ ) |
|--------------------------|--------------|----------------------|----------------------|--------------|--------------|--------------|--------------------------------------------------|
| B3LYP/6-311G(d,p),ccPVTZ | Water        | Elect <sub>298</sub> | -3304903.593         | -561162.3242 | -2213245.891 | -1652820.382 | <b>-0.35</b>                                     |
|                          |              | Gibbs <sub>298</sub> | -3304817.045         | -561072.1257 | -2213108.98  | -1652779.499 | <b>0.69</b>                                      |
|                          | Diethylether | Elect <sub>298</sub> | -3304908.825         | -561160.7837 | -2213244.498 | -1652822.946 | <b>2.17</b>                                      |
|                          |              | Gibbs <sub>298</sub> | -3304822.144         | -561070.5281 | -2213109.409 | -1652781.878 | <b>1.38</b>                                      |

**Table S4:** Model reaction for the anionic reaction:  $(\text{PhSe})_2 + \text{Cys}^- \longrightarrow \text{PhSe-SCys} + \text{PhSe}^-$ . Level of theory: SMD-B3LYP-D3(BJ)/6-311G(d,p),ccPVTZ.  $\Delta_{\text{rxn}}$ , in  $\text{kcal mol}^{-1}$ , is the classical reaction energy. Electronic ( $E_{\text{Elect}_{298}}$ ) energies and Gibb's ( $G_{\text{Gibbs}_{298}}$ ) free energies were measured at

298K

| Method                   | Phase        | Type of Energy       | E(PhSe) <sub>2</sub> | E(CysS <sup>-</sup> ) | E(PhSe-SCys) | E(PhSe <sup>-</sup> ) | $\Delta_{\text{rxn}}$ ( $\text{kcal mol}^{-1}$ ) |
|--------------------------|--------------|----------------------|----------------------|-----------------------|--------------|-----------------------|--------------------------------------------------|
| B3LYP/6-311G(d,p),ccPVTZ | Water        | Elect <sub>298</sub> | -3304903.593         | -560858.834           | -2213245.891 | -1652533.559          | <b>-17.02</b>                                    |
|                          |              | Gibbs <sub>298</sub> | -3304817.045         | -560774.438           | -2213108.980 | -1652496.810          | <b>-14.31</b>                                    |
|                          | Diethylether | Elect <sub>298</sub> | -3304908.825         | -560845.725           | -2213244.498 | -1652521.834          | <b>-11.78</b>                                    |
|                          |              | Gibbs <sub>298</sub> | -3304822.144         | -560761.086           | -2213109.409 | -1652485.355          | <b>-11.53</b>                                    |



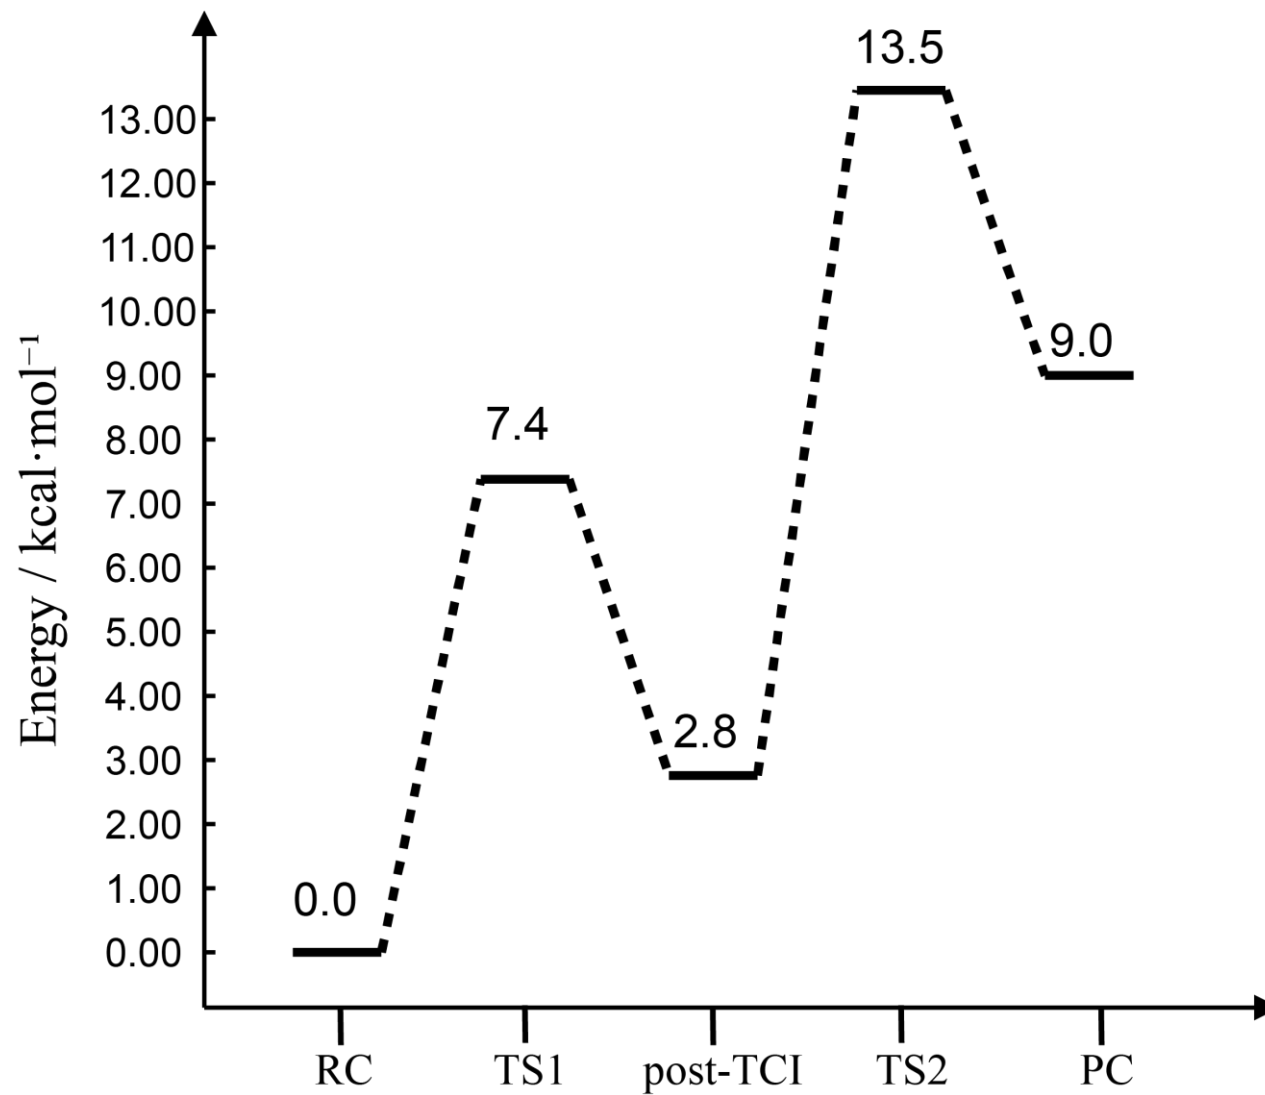

**Figure S4.** Energy profile for the inhibition mechanism of M<sup>Pro</sup> by (PhSe)<sub>2</sub> optimized in water (black) starting from the snapshot at 88 ns. All energies (G) are relative to RC. Level of theory: SMD-B3LYP-D3(BJ)/6-311G(d,p),cc-pVTZ.



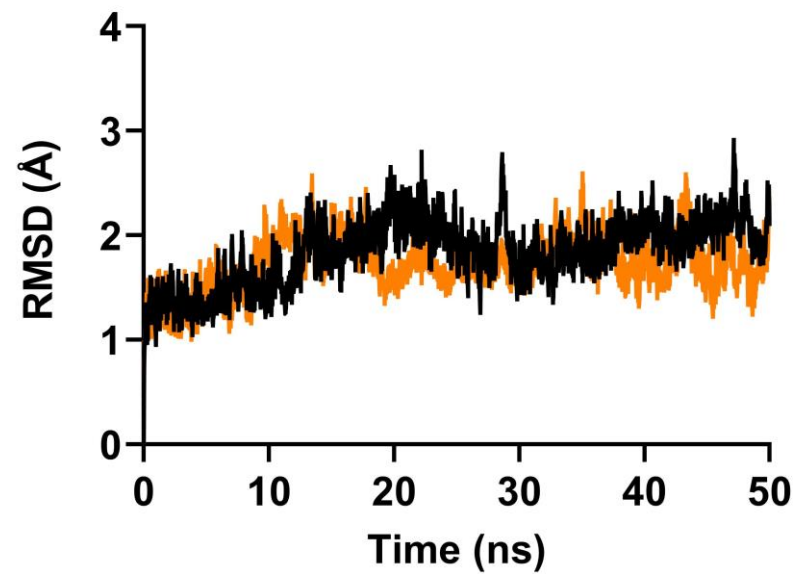

**Figure S5.** The equilibration RMSD plots of  $(\text{PhSe})_2 + \text{M}^{\text{Pro}}$  represented in orange and the Apo structure in black. Simulation time 50 ns

**Table S5:** The calculated binding free energies using MM/GBSA method for  $\text{M}^{\text{Pro}}$  DPDS complex.

| Energy<br>(Kcal/mol) | GBSA |     |
|----------------------|------|-----|
|                      | Mean | Std |
|                      |      |     |

|                             |        |      |
|-----------------------------|--------|------|
| $\Delta E_{vdw}$            | -24.51 | 4.15 |
| $\Delta E_{ele}$            | -3.29  | 2.27 |
| $\Delta G_{pol}$ [EGB]      | 11.34  | 2.58 |
| $\Delta G_{nonpol}$ [ESURF] | -3.18  | 0.52 |
| $\Delta G_{bind}$           | -19.64 | 3.76 |
|                             |        |      |

**Table S6:** The calculated binding free energies using MM/GBSA method for PL<sup>PRO</sup> DPDS complex.

| Energy<br>(Kcal/mol)        | GBSA   |      |
|-----------------------------|--------|------|
|                             | Mean   | Std  |
| $\Delta E_{vdw}$            | -29.30 | 1.86 |
| $\Delta E_{ele}$            | -4.72  | 2.04 |
| $\Delta G_{pol}$ [EGB]      | 14.36  | 1.59 |
| $\Delta G_{nonpol}$ [ESURF] | -3.89  | 0.18 |
| $\Delta G_{bind}$           | -23.55 | 1.93 |

**Table S7:** Total Energy Decomposition using MM/GBSA method for M<sup>PRO</sup> (PhSe)<sub>2</sub> complex.

Total Energy Decomposition:

| Residue | Internal<br>Avg. | van der Waals<br>Avg. | Electrostatic<br>Avg. | Polar Solvation<br>Avg. | Non-Polar Solv.<br>Avg. | TOTAL |
|---------|------------------|-----------------------|-----------------------|-------------------------|-------------------------|-------|
| SER 1   | 0.00             | 0.00                  | 0.01                  | -0.01                   | 0.00                    | 0.00  |
| GLY 2   | 0.00             | 0.00                  | 0.00                  | 0.00                    | 0.00                    | 0.00  |
| PHE 3   | 0.00             | 0.00                  | 0.00                  | 0.00                    | 0.00                    | 0.00  |
| ARG 4   | 0.00             | 0.00                  | 0.01                  | -0.01                   | 0.00                    | 0.00  |
| LYS 5   | 0.00             | 0.00                  | 0.02                  | -0.02                   | 0.00                    | 0.00  |
| MET 6   | 0.00             | 0.00                  | 0.00                  | 0.00                    | 0.00                    | 0.00  |
| ALA 7   | 0.00             | 0.00                  | 0.00                  | 0.00                    | 0.00                    | 0.00  |
| PHE 8   | 0.00             | 0.00                  | 0.00                  | 0.00                    | 0.00                    | 0.00  |
| PRO 9   | 0.00             | 0.00                  | 0.00                  | 0.00                    | 0.00                    | 0.00  |
| SER 10  | 0.00             | 0.00                  | 0.00                  | 0.00                    | 0.00                    | 0.00  |
| GLY 11  | 0.00             | 0.00                  | 0.00                  | 0.00                    | 0.00                    | 0.00  |
| LYS 12  | 0.00             | 0.00                  | 0.01                  | -0.01                   | 0.00                    | 0.00  |
| VAL 13  | 0.00             | 0.00                  | 0.00                  | 0.00                    | 0.00                    | 0.00  |
| GLU 14  | 0.00             | 0.00                  | -0.02                 | 0.02                    | 0.00                    | 0.00  |
| GLY 15  | 0.00             | 0.00                  | 0.00                  | 0.00                    | 0.00                    | 0.00  |
| CYS 16  | 0.00             | 0.00                  | 0.00                  | 0.00                    | 0.00                    | 0.00  |
| MET 17  | 0.00             | 0.00                  | 0.00                  | 0.00                    | 0.00                    | 0.00  |
| VAL 18  | 0.00             | 0.00                  | 0.00                  | 0.00                    | 0.00                    | 0.00  |
| GLN 19  | 0.00             | 0.00                  | 0.00                  | 0.01                    | 0.00                    | 0.01  |
| VAL 20  | 0.00             | 0.00                  | 0.00                  | 0.00                    | 0.00                    | 0.00  |
| THR 21  | 0.00             | 0.00                  | 0.00                  | 0.01                    | 0.00                    | 0.00  |
| CYS 22  | 0.00             | -0.01                 | 0.00                  | 0.00                    | 0.00                    | 0.00  |
| GLY 23  | 0.00             | 0.00                  | 0.00                  | 0.01                    | 0.00                    | 0.00  |
| THR 24  | 0.00             | -0.02                 | 0.00                  | 0.03                    | 0.00                    | 0.00  |
| THR 25  | 0.00             | -0.11                 | -0.01                 | 0.05                    | -0.02                   | -0.10 |
| THR 26  | 0.00             | -0.02                 | 0.00                  | 0.02                    | 0.00                    | 0.00  |
| LEU 27  | 0.00             | -0.06                 | 0.00                  | 0.01                    | 0.00                    | -0.05 |
| ASN 28  | 0.00             | 0.00                  | 0.00                  | 0.00                    | 0.00                    | 0.00  |
| GLY 29  | 0.00             | 0.00                  | 0.00                  | 0.00                    | 0.00                    | 0.00  |

|        |      |       |       |       |       |       |
|--------|------|-------|-------|-------|-------|-------|
| LEU 30 | 0.00 | 0.00  | 0.00  | 0.00  | 0.00  | 0.00  |
| TRP 31 | 0.00 | 0.00  | 0.00  | 0.00  | 0.00  | 0.00  |
| LEU 32 | 0.00 | 0.00  | 0.00  | 0.00  | 0.00  | 0.00  |
| ASP 33 | 0.00 | 0.00  | -0.01 | 0.01  | 0.00  | 0.00  |
| ASP 34 | 0.00 | 0.00  | 0.00  | 0.00  | 0.00  | 0.00  |
| VAL 35 | 0.00 | 0.00  | 0.00  | 0.00  | 0.00  | 0.00  |
| VAL 36 | 0.00 | 0.00  | 0.00  | 0.00  | 0.00  | 0.00  |
| TYR 37 | 0.00 | 0.00  | 0.00  | 0.00  | 0.00  | 0.00  |
| CYS 38 | 0.00 | -0.01 | 0.01  | -0.01 | 0.00  | -0.01 |
| PRO 39 | 0.00 | -0.04 | 0.02  | -0.03 | 0.00  | -0.05 |
| ARG 40 | 0.00 | -0.08 | -0.05 | 0.00  | 0.00  | -0.13 |
| HID 41 | 0.00 | -1.29 | -0.03 | 0.61  | -0.16 | -0.86 |
| VAL 42 | 0.00 | -0.06 | 0.01  | 0.01  | 0.00  | -0.04 |
| ILE 43 | 0.00 | -0.06 | 0.00  | 0.00  | 0.00  | -0.06 |
| CYS 44 | 0.00 | -0.50 | -0.10 | 0.29  | -0.06 | -0.38 |
| THR 45 | 0.00 | -0.23 | 0.03  | 0.06  | -0.01 | -0.15 |
| SER 46 | 0.00 | -0.32 | -0.02 | 0.19  | -0.06 | -0.21 |
| GLU 47 | 0.00 | -0.05 | 0.07  | -0.01 | 0.00  | 0.01  |
| ASP 48 | 0.00 | -0.11 | 0.04  | 0.01  | 0.00  | -0.06 |
| MET 49 | 0.00 | -1.36 | -0.13 | 0.46  | -0.25 | -1.27 |
| LEU 50 | 0.00 | -0.24 | 0.01  | 0.06  | -0.03 | -0.21 |
| ASN 51 | 0.00 | -0.05 | -0.03 | 0.09  | 0.00  | 0.00  |
| PRO 52 | 0.00 | -0.02 | 0.00  | 0.01  | 0.00  | -0.01 |
| ASN 53 | 0.00 | -0.02 | -0.01 | 0.03  | 0.00  | 0.01  |
| TYR 54 | 0.00 | -0.49 | -0.02 | 0.20  | -0.03 | -0.34 |
| GLU 55 | 0.00 | -0.03 | 0.01  | 0.06  | 0.00  | 0.04  |
| ASP 56 | 0.00 | 0.00  | 0.02  | -0.01 | 0.00  | 0.01  |
| LEU 57 | 0.00 | -0.03 | 0.00  | 0.00  | 0.00  | -0.03 |
| LEU 58 | 0.00 | -0.01 | 0.00  | 0.00  | 0.00  | 0.00  |
| ILE 59 | 0.00 | 0.00  | 0.00  | 0.00  | 0.00  | 0.00  |
| ARG 60 | 0.00 | 0.00  | -0.02 | 0.03  | 0.00  | 0.01  |
| LYS 61 | 0.00 | -0.01 | -0.05 | 0.09  | 0.00  | 0.04  |
| SER 62 | 0.00 | 0.00  | 0.00  | 0.00  | 0.00  | 0.00  |

|        |      |       |       |      |      |       |
|--------|------|-------|-------|------|------|-------|
| ASN 63 | 0.00 | 0.00  | 0.00  | 0.00 | 0.00 | 0.00  |
| HIE 64 | 0.00 | 0.00  | 0.00  | 0.00 | 0.00 | 0.00  |
| ASN 65 | 0.00 | 0.00  | 0.00  | 0.01 | 0.00 | 0.00  |
| PHE 66 | 0.00 | 0.00  | 0.00  | 0.00 | 0.00 | 0.00  |
| LEU 67 | 0.00 | 0.00  | 0.00  | 0.00 | 0.00 | 0.00  |
| VAL 68 | 0.00 | 0.00  | 0.00  | 0.00 | 0.00 | 0.00  |
| GLN 69 | 0.00 | 0.00  | 0.00  | 0.00 | 0.00 | 0.00  |
| ALA 70 | 0.00 | 0.00  | 0.00  | 0.00 | 0.00 | 0.00  |
| GLY 71 | 0.00 | 0.00  | 0.00  | 0.00 | 0.00 | 0.00  |
| ASN 72 | 0.00 | 0.00  | 0.00  | 0.00 | 0.00 | 0.00  |
| VAL 73 | 0.00 | 0.00  | 0.00  | 0.00 | 0.00 | 0.00  |
| GLN 74 | 0.00 | 0.00  | 0.00  | 0.00 | 0.00 | 0.00  |
| LEU 75 | 0.00 | 0.00  | 0.00  | 0.00 | 0.00 | 0.00  |
| ARG 76 | 0.00 | 0.00  | 0.00  | 0.00 | 0.00 | 0.00  |
| VAL 77 | 0.00 | 0.00  | 0.00  | 0.00 | 0.00 | 0.00  |
| ILE 78 | 0.00 | 0.00  | 0.00  | 0.00 | 0.00 | 0.00  |
| GLY 79 | 0.00 | 0.00  | 0.00  | 0.00 | 0.00 | 0.00  |
| HIE 80 | 0.00 | 0.00  | 0.00  | 0.01 | 0.00 | 0.00  |
| SER 81 | 0.00 | 0.00  | 0.00  | 0.00 | 0.00 | 0.00  |
| MET 82 | 0.00 | 0.00  | 0.00  | 0.00 | 0.00 | 0.00  |
| GLN 83 | 0.00 | 0.00  | 0.00  | 0.01 | 0.00 | 0.00  |
| ASN 84 | 0.00 | 0.00  | 0.01  | 0.00 | 0.00 | 0.00  |
| CYS 85 | 0.00 | -0.03 | -0.01 | 0.02 | 0.00 | -0.02 |
| VAL 86 | 0.00 | -0.01 | 0.00  | 0.00 | 0.00 | 0.00  |
| LEU 87 | 0.00 | -0.01 | 0.00  | 0.00 | 0.00 | 0.00  |
| LYS 88 | 0.00 | 0.00  | 0.00  | 0.00 | 0.00 | 0.00  |
| LEU 89 | 0.00 | 0.00  | 0.00  | 0.00 | 0.00 | 0.00  |
| LYS 90 | 0.00 | 0.00  | 0.00  | 0.00 | 0.00 | 0.00  |
| VAL 91 | 0.00 | 0.00  | 0.00  | 0.00 | 0.00 | 0.00  |
| ASP 92 | 0.00 | 0.00  | 0.00  | 0.00 | 0.00 | 0.00  |
| THR 93 | 0.00 | 0.00  | 0.00  | 0.00 | 0.00 | 0.00  |
| ALA 94 | 0.00 | 0.00  | 0.00  | 0.00 | 0.00 | 0.00  |
| ASN 95 | 0.00 | 0.00  | 0.00  | 0.00 | 0.00 | 0.00  |

|         |      |      |      |       |      |      |
|---------|------|------|------|-------|------|------|
| PRO 96  | 0.00 | 0.00 | 0.00 | 0.00  | 0.00 | 0.00 |
| LYS 97  | 0.00 | 0.00 | 0.01 | -0.01 | 0.00 | 0.00 |
| THR 98  | 0.00 | 0.00 | 0.00 | 0.00  | 0.00 | 0.00 |
| PRO 99  | 0.00 | 0.00 | 0.00 | 0.00  | 0.00 | 0.00 |
| LYS 100 | 0.00 | 0.00 | 0.01 | -0.01 | 0.00 | 0.00 |
| TYR 101 | 0.00 | 0.00 | 0.00 | 0.00  | 0.00 | 0.00 |
| LYS 102 | 0.00 | 0.00 | 0.01 | -0.01 | 0.00 | 0.00 |
| PHE 103 | 0.00 | 0.00 | 0.00 | 0.00  | 0.00 | 0.00 |
| VAL 104 | 0.00 | 0.00 | 0.00 | 0.00  | 0.00 | 0.00 |
| ARG 105 | 0.00 | 0.00 | 0.02 | -0.02 | 0.00 | 0.01 |
| ILE 106 | 0.00 | 0.00 | 0.00 | 0.00  | 0.00 | 0.00 |
| GLN 107 | 0.00 | 0.00 | 0.00 | 0.00  | 0.00 | 0.00 |
| PRO 108 | 0.00 | 0.00 | 0.00 | 0.00  | 0.00 | 0.00 |
| GLY 109 | 0.00 | 0.00 | 0.00 | 0.00  | 0.00 | 0.00 |
| GLN 110 | 0.00 | 0.00 | 0.00 | 0.00  | 0.00 | 0.00 |
| THR 111 | 0.00 | 0.00 | 0.00 | 0.00  | 0.00 | 0.00 |
| PHE 112 | 0.00 | 0.00 | 0.00 | 0.00  | 0.00 | 0.00 |
| SER 113 | 0.00 | 0.00 | 0.00 | 0.00  | 0.00 | 0.00 |
| VAL 114 | 0.00 | 0.00 | 0.00 | 0.00  | 0.00 | 0.00 |
| LEU 115 | 0.00 | 0.00 | 0.00 | 0.00  | 0.00 | 0.00 |
| ALA 116 | 0.00 | 0.00 | 0.00 | 0.00  | 0.00 | 0.00 |
| CYS 117 | 0.00 | 0.00 | 0.00 | 0.00  | 0.00 | 0.00 |
| TYR 118 | 0.00 | 0.00 | 0.00 | 0.01  | 0.00 | 0.00 |
| ASN 119 | 0.00 | 0.00 | 0.00 | 0.01  | 0.00 | 0.01 |
| GLY 120 | 0.00 | 0.00 | 0.00 | 0.00  | 0.00 | 0.00 |
| SER 121 | 0.00 | 0.00 | 0.00 | 0.00  | 0.00 | 0.00 |
| PRO 122 | 0.00 | 0.00 | 0.00 | 0.00  | 0.00 | 0.00 |
| SER 123 | 0.00 | 0.00 | 0.00 | 0.00  | 0.00 | 0.00 |
| GLY 124 | 0.00 | 0.00 | 0.00 | 0.00  | 0.00 | 0.00 |
| VAL 125 | 0.00 | 0.00 | 0.00 | 0.00  | 0.00 | 0.00 |
| TYR 126 | 0.00 | 0.00 | 0.00 | 0.00  | 0.00 | 0.00 |
| GLN 127 | 0.00 | 0.00 | 0.00 | 0.00  | 0.00 | 0.00 |
| CYS 128 | 0.00 | 0.00 | 0.00 | 0.00  | 0.00 | 0.00 |

|         |      |       |       |       |       |       |
|---------|------|-------|-------|-------|-------|-------|
| ALA 129 | 0.00 | 0.00  | 0.00  | 0.00  | 0.00  | 0.00  |
| MET 130 | 0.00 | 0.00  | 0.00  | 0.00  | 0.00  | 0.00  |
| ARG 131 | 0.00 | 0.00  | 0.02  | -0.02 | 0.00  | 0.00  |
| PRO 132 | 0.00 | 0.00  | 0.00  | 0.00  | 0.00  | 0.00  |
| ASN 133 | 0.00 | 0.00  | 0.00  | 0.01  | 0.00  | 0.00  |
| PHE 134 | 0.00 | 0.00  | 0.00  | 0.01  | 0.00  | 0.00  |
| THR 135 | 0.00 | 0.00  | 0.00  | 0.00  | 0.00  | 0.00  |
| ILE 136 | 0.00 | 0.00  | 0.00  | 0.00  | 0.00  | 0.00  |
| LYS 137 | 0.00 | 0.00  | 0.02  | -0.02 | 0.00  | 0.00  |
| GLY 138 | 0.00 | 0.00  | 0.00  | 0.00  | 0.00  | 0.00  |
| SER 139 | 0.00 | 0.00  | 0.00  | 0.00  | 0.00  | 0.00  |
| PHE 140 | 0.00 | 0.00  | 0.00  | 0.01  | 0.00  | 0.00  |
| LEU 141 | 0.00 | 0.00  | 0.00  | 0.01  | 0.00  | 0.00  |
| ASN 142 | 0.00 | -0.04 | 0.00  | 0.06  | -0.01 | 0.01  |
| GLY 143 | 0.00 | -0.02 | 0.00  | 0.01  | 0.00  | -0.01 |
| SER 144 | 0.00 | -0.01 | 0.00  | 0.00  | 0.00  | -0.01 |
| CYS 145 | 0.00 | -0.08 | 0.03  | -0.01 | -0.01 | -0.07 |
| GLY 146 | 0.00 | -0.01 | 0.01  | 0.01  | 0.00  | 0.01  |
| SER 147 | 0.00 | 0.00  | 0.00  | 0.01  | 0.00  | 0.00  |
| VAL 148 | 0.00 | 0.00  | 0.00  | 0.00  | 0.00  | 0.00  |
| GLY 149 | 0.00 | 0.00  | 0.00  | 0.00  | 0.00  | 0.00  |
| PHE 150 | 0.00 | 0.00  | 0.00  | 0.00  | 0.00  | 0.00  |
| ASN 151 | 0.00 | 0.00  | 0.00  | 0.00  | 0.00  | 0.00  |
| ILE 152 | 0.00 | 0.00  | 0.00  | 0.00  | 0.00  | 0.00  |
| ASP 153 | 0.00 | 0.00  | -0.01 | 0.01  | 0.00  | 0.00  |
| TYR 154 | 0.00 | 0.00  | 0.00  | 0.00  | 0.00  | 0.00  |
| ASP 155 | 0.00 | 0.00  | -0.01 | 0.01  | 0.00  | 0.00  |
| CYS 156 | 0.00 | 0.00  | 0.00  | 0.00  | 0.00  | 0.00  |
| VAL 157 | 0.00 | 0.00  | 0.00  | 0.00  | 0.00  | 0.00  |
| SER 158 | 0.00 | 0.00  | 0.00  | 0.00  | 0.00  | 0.00  |
| PHE 159 | 0.00 | 0.00  | 0.00  | 0.00  | 0.00  | 0.00  |
| CYS 160 | 0.00 | 0.00  | 0.00  | 0.00  | 0.00  | 0.00  |
| TYR 161 | 0.00 | 0.00  | 0.00  | 0.00  | 0.00  | 0.00  |

|         |      |       |       |       |       |       |
|---------|------|-------|-------|-------|-------|-------|
| MET 162 | 0.00 | -0.01 | -0.01 | 0.01  | 0.00  | -0.01 |
| HIE 163 | 0.00 | -0.03 | -0.01 | 0.02  | 0.00  | -0.02 |
| HIE 164 | 0.00 | -0.37 | -0.07 | 0.41  | -0.03 | -0.05 |
| MET 165 | 0.00 | -0.87 | -0.19 | 0.30  | -0.16 | -0.91 |
| GLU 166 | 0.00 | -0.16 | -0.06 | 0.24  | -0.03 | 0.00  |
| LEU 167 | 0.00 | -0.13 | 0.02  | 0.02  | -0.01 | -0.10 |
| PRO 168 | 0.00 | -0.07 | 0.01  | 0.01  | -0.02 | -0.07 |
| THR 169 | 0.00 | -0.01 | 0.00  | 0.01  | 0.00  | 0.00  |
| GLY 170 | 0.00 | 0.00  | 0.00  | 0.00  | 0.00  | 0.00  |
| VAL 171 | 0.00 | -0.01 | 0.00  | 0.00  | 0.00  | -0.01 |
| HIE 172 | 0.00 | -0.01 | 0.00  | 0.01  | 0.00  | -0.01 |
| ALA 173 | 0.00 | -0.03 | -0.01 | 0.01  | 0.00  | -0.02 |
| GLY 174 | 0.00 | -0.01 | 0.01  | 0.00  | 0.00  | -0.01 |
| THR 175 | 0.00 | -0.01 | -0.01 | 0.01  | 0.00  | -0.01 |
| ASP 176 | 0.00 | 0.00  | -0.03 | 0.03  | 0.00  | 0.00  |
| LEU 177 | 0.00 | 0.00  | 0.00  | 0.00  | 0.00  | 0.00  |
| GLU 178 | 0.00 | 0.00  | -0.01 | 0.01  | 0.00  | 0.00  |
| GLY 179 | 0.00 | 0.00  | 0.01  | 0.00  | 0.00  | 0.00  |
| ASN 180 | 0.00 | 0.00  | 0.00  | 0.01  | 0.00  | 0.00  |
| PHE 181 | 0.00 | -0.10 | 0.02  | 0.03  | 0.00  | -0.05 |
| TYR 182 | 0.00 | 0.00  | 0.00  | 0.01  | 0.00  | 0.00  |
| GLY 183 | 0.00 | 0.00  | 0.00  | 0.01  | 0.00  | 0.00  |
| PRO 184 | 0.00 | -0.01 | 0.01  | 0.00  | 0.00  | 0.00  |
| PHE 185 | 0.00 | -0.07 | 0.02  | -0.01 | 0.00  | -0.06 |
| VAL 186 | 0.00 | -0.33 | -0.05 | 0.21  | -0.01 | -0.17 |
| ASP 187 | 0.00 | -1.05 | -0.12 | 0.42  | -0.09 | -0.84 |
| ARG 188 | 0.00 | -1.44 | -0.50 | 1.10  | -0.12 | -0.96 |
| GLN 189 | 0.00 | -1.53 | -0.33 | 0.88  | -0.23 | -1.22 |
| THR 190 | 0.00 | -0.29 | -0.06 | 0.22  | -0.03 | -0.15 |
| ALA 191 | 0.00 | -0.05 | 0.01  | 0.00  | -0.01 | -0.04 |
| GLN 192 | 0.00 | -0.13 | -0.02 | 0.12  | -0.01 | -0.05 |
| ALA 193 | 0.00 | -0.01 | 0.00  | 0.01  | 0.00  | 0.00  |
| ALA 194 | 0.00 | 0.00  | 0.00  | 0.00  | 0.00  | 0.00  |



|         |      |      |       |      |      |      |
|---------|------|------|-------|------|------|------|
| GLY 195 | 0.00 | 0.00 | 0.00  | 0.00 | 0.00 | 0.00 |
| THR 196 | 0.00 | 0.00 | 0.00  | 0.00 | 0.00 | 0.00 |
| ASP 197 | 0.00 | 0.00 | -0.02 | 0.02 | 0.00 | 0.00 |
| THR 198 | 0.00 | 0.00 | 0.00  | 0.00 | 0.00 | 0.00 |
| THR 199 | 0.00 | 0.00 | 0.00  | 0.00 | 0.00 | 0.00 |
| ILE 200 | 0.00 | 0.00 | 0.00  | 0.00 | 0.00 | 0.00 |
| THR 201 | 0.00 | 0.00 | 0.00  | 0.00 | 0.00 | 0.00 |
| VAL 202 | 0.00 | 0.00 | 0.00  | 0.00 | 0.00 | 0.00 |
| ASN 203 | 0.00 | 0.00 | 0.00  | 0.00 | 0.00 | 0.00 |
| VAL 204 | 0.00 | 0.00 | 0.00  | 0.00 | 0.00 | 0.00 |
| LEU 205 | 0.00 | 0.00 | 0.00  | 0.00 | 0.00 | 0.00 |
| ALA 206 | 0.00 | 0.00 | 0.00  | 0.00 | 0.00 | 0.00 |
| TRP 207 | 0.00 | 0.00 | 0.00  | 0.00 | 0.00 | 0.00 |
| LEU 208 | 0.00 | 0.00 | 0.00  | 0.00 | 0.00 | 0.00 |
| TYR 209 | 0.00 | 0.00 | 0.00  | 0.00 | 0.00 | 0.00 |
| ALA 210 | 0.00 | 0.00 | 0.00  | 0.00 | 0.00 | 0.00 |
| ALA 211 | 0.00 | 0.00 | 0.00  | 0.00 | 0.00 | 0.00 |
| VAL 212 | 0.00 | 0.00 | 0.00  | 0.00 | 0.00 | 0.00 |
| ILE 213 | 0.00 | 0.00 | 0.00  | 0.00 | 0.00 | 0.00 |
| ASN 214 | 0.00 | 0.00 | 0.00  | 0.00 | 0.00 | 0.00 |
| GLY 215 | 0.00 | 0.00 | 0.00  | 0.00 | 0.00 | 0.00 |
| ASP 216 | 0.00 | 0.00 | -0.01 | 0.01 | 0.00 | 0.00 |
| ARG 217 | 0.00 | 0.00 | 0.00  | 0.00 | 0.00 | 0.00 |
| TRP 218 | 0.00 | 0.00 | 0.00  | 0.00 | 0.00 | 0.00 |
| PHE 219 | 0.00 | 0.00 | 0.00  | 0.00 | 0.00 | 0.00 |
| LEU 220 | 0.00 | 0.00 | 0.00  | 0.00 | 0.00 | 0.00 |
| ASN 221 | 0.00 | 0.00 | 0.00  | 0.00 | 0.00 | 0.00 |
| ARG 222 | 0.00 | 0.00 | 0.00  | 0.00 | 0.00 | 0.00 |
| PHE 223 | 0.00 | 0.00 | 0.00  | 0.00 | 0.00 | 0.00 |
| THR 224 | 0.00 | 0.00 | 0.00  | 0.00 | 0.00 | 0.00 |
| THR 225 | 0.00 | 0.00 | 0.00  | 0.00 | 0.00 | 0.00 |
| THR 226 | 0.00 | 0.00 | 0.00  | 0.00 | 0.00 | 0.00 |
| LEU 227 | 0.00 | 0.00 | 0.00  | 0.00 | 0.00 | 0.00 |

|         |      |      |       |       |      |      |
|---------|------|------|-------|-------|------|------|
| ASN 228 | 0.00 | 0.00 | 0.00  | 0.00  | 0.00 | 0.00 |
| ASP 229 | 0.00 | 0.00 | 0.00  | 0.00  | 0.00 | 0.00 |
| PHE 230 | 0.00 | 0.00 | 0.00  | 0.00  | 0.00 | 0.00 |
| ASN 231 | 0.00 | 0.00 | 0.00  | 0.00  | 0.00 | 0.00 |
| LEU 232 | 0.00 | 0.00 | 0.00  | 0.00  | 0.00 | 0.00 |
| VAL 233 | 0.00 | 0.00 | 0.00  | 0.00  | 0.00 | 0.00 |
| ALA 234 | 0.00 | 0.00 | 0.00  | 0.00  | 0.00 | 0.00 |
| MET 235 | 0.00 | 0.00 | 0.00  | 0.00  | 0.00 | 0.00 |
| LYS 236 | 0.00 | 0.00 | 0.01  | -0.01 | 0.00 | 0.00 |
| TYR 237 | 0.00 | 0.00 | 0.00  | 0.00  | 0.00 | 0.00 |
| ASN 238 | 0.00 | 0.00 | 0.00  | 0.00  | 0.00 | 0.00 |
| TYR 239 | 0.00 | 0.00 | 0.00  | 0.00  | 0.00 | 0.00 |
| GLU 240 | 0.00 | 0.00 | -0.01 | 0.01  | 0.00 | 0.00 |
| PRO 241 | 0.00 | 0.00 | 0.00  | 0.00  | 0.00 | 0.00 |
| LEU 242 | 0.00 | 0.00 | 0.00  | 0.00  | 0.00 | 0.00 |
| THR 243 | 0.00 | 0.00 | 0.00  | 0.00  | 0.00 | 0.00 |
| GLN 244 | 0.00 | 0.00 | 0.00  | 0.00  | 0.00 | 0.00 |
| ASP 245 | 0.00 | 0.00 | -0.01 | 0.01  | 0.00 | 0.00 |
| HIE 246 | 0.00 | 0.00 | 0.00  | 0.00  | 0.00 | 0.00 |
| VAL 247 | 0.00 | 0.00 | 0.00  | 0.00  | 0.00 | 0.00 |
| ASP 248 | 0.00 | 0.00 | -0.01 | 0.01  | 0.00 | 0.00 |
| ILE 249 | 0.00 | 0.00 | 0.00  | 0.00  | 0.00 | 0.00 |
| LEU 250 | 0.00 | 0.00 | 0.00  | 0.00  | 0.00 | 0.00 |
| GLY 251 | 0.00 | 0.00 | 0.00  | 0.00  | 0.00 | 0.00 |
| PRO 252 | 0.00 | 0.00 | 0.00  | 0.00  | 0.00 | 0.00 |
| LEU 253 | 0.00 | 0.00 | 0.00  | 0.00  | 0.00 | 0.00 |
| SER 254 | 0.00 | 0.00 | 0.00  | 0.00  | 0.00 | 0.00 |
| ALA 255 | 0.00 | 0.00 | 0.00  | 0.00  | 0.00 | 0.00 |
| GLN 256 | 0.00 | 0.00 | 0.00  | 0.00  | 0.00 | 0.00 |
| THR 257 | 0.00 | 0.00 | 0.00  | 0.00  | 0.00 | 0.00 |
| GLY 258 | 0.00 | 0.00 | 0.00  | 0.00  | 0.00 | 0.00 |
| ILE 259 | 0.00 | 0.00 | 0.00  | 0.00  | 0.00 | 0.00 |
| ALA 260 | 0.00 | 0.00 | 0.00  | 0.00  | 0.00 | 0.00 |

|         |      |      |       |       |      |      |
|---------|------|------|-------|-------|------|------|
| VAL 261 | 0.00 | 0.00 | 0.00  | 0.00  | 0.00 | 0.00 |
| LEU 262 | 0.00 | 0.00 | 0.00  | 0.00  | 0.00 | 0.00 |
| ASP 263 | 0.00 | 0.00 | 0.00  | 0.00  | 0.00 | 0.00 |
| MET 264 | 0.00 | 0.00 | 0.00  | 0.00  | 0.00 | 0.00 |
| CYS 265 | 0.00 | 0.00 | 0.00  | 0.00  | 0.00 | 0.00 |
| ALA 266 | 0.00 | 0.00 | 0.00  | 0.00  | 0.00 | 0.00 |
| SER 267 | 0.00 | 0.00 | 0.00  | 0.00  | 0.00 | 0.00 |
| LEU 268 | 0.00 | 0.00 | 0.00  | 0.00  | 0.00 | 0.00 |
| LYS 269 | 0.00 | 0.00 | 0.00  | 0.00  | 0.00 | 0.00 |
| GLU 270 | 0.00 | 0.00 | 0.00  | 0.00  | 0.00 | 0.00 |
| LEU 271 | 0.00 | 0.00 | 0.00  | 0.00  | 0.00 | 0.00 |
| LEU 272 | 0.00 | 0.00 | 0.00  | 0.00  | 0.00 | 0.00 |
| GLN 273 | 0.00 | 0.00 | 0.00  | 0.00  | 0.00 | 0.00 |
| ASN 274 | 0.00 | 0.00 | 0.00  | 0.00  | 0.00 | 0.00 |
| GLY 275 | 0.00 | 0.00 | 0.00  | 0.00  | 0.00 | 0.00 |
| MET 276 | 0.00 | 0.00 | 0.00  | 0.00  | 0.00 | 0.00 |
| ASN 277 | 0.00 | 0.00 | 0.00  | 0.00  | 0.00 | 0.00 |
| GLY 278 | 0.00 | 0.00 | 0.00  | 0.00  | 0.00 | 0.00 |
| ARG 279 | 0.00 | 0.00 | 0.01  | -0.01 | 0.00 | 0.00 |
| THR 280 | 0.00 | 0.00 | 0.00  | 0.00  | 0.00 | 0.00 |
| ILE 281 | 0.00 | 0.00 | 0.00  | 0.00  | 0.00 | 0.00 |
| LEU 282 | 0.00 | 0.00 | 0.00  | 0.00  | 0.00 | 0.00 |
| GLY 283 | 0.00 | 0.00 | 0.00  | 0.00  | 0.00 | 0.00 |
| SER 284 | 0.00 | 0.00 | 0.00  | 0.00  | 0.00 | 0.00 |
| ALA 285 | 0.00 | 0.00 | 0.00  | 0.00  | 0.00 | 0.00 |
| LEU 286 | 0.00 | 0.00 | 0.00  | 0.00  | 0.00 | 0.00 |
| LEU 287 | 0.00 | 0.00 | 0.00  | 0.00  | 0.00 | 0.00 |
| GLU 288 | 0.00 | 0.00 | -0.01 | 0.01  | 0.00 | 0.00 |
| ASP 289 | 0.00 | 0.00 | -0.02 | 0.02  | 0.00 | 0.00 |
| GLU 290 | 0.00 | 0.00 | -0.02 | 0.02  | 0.00 | 0.00 |
| PHE 291 | 0.00 | 0.00 | 0.00  | 0.00  | 0.00 | 0.00 |
| THR 292 | 0.00 | 0.00 | 0.00  | 0.00  | 0.00 | 0.00 |
| PRO 293 | 0.00 | 0.00 | 0.00  | 0.00  | 0.00 | 0.00 |

|         |      |      |       |       |      |      |
|---------|------|------|-------|-------|------|------|
| PHE 294 | 0.00 | 0.00 | 0.00  | 0.00  | 0.00 | 0.00 |
| ASP 295 | 0.00 | 0.00 | -0.01 | 0.01  | 0.00 | 0.00 |
| VAL 296 | 0.00 | 0.00 | 0.00  | 0.00  | 0.00 | 0.00 |
| VAL 297 | 0.00 | 0.00 | 0.00  | 0.00  | 0.00 | 0.00 |
| ARG 298 | 0.00 | 0.00 | 0.01  | -0.01 | 0.00 | 0.00 |
| GLN 299 | 0.00 | 0.00 | 0.00  | 0.00  | 0.00 | 0.00 |
| CYS 300 | 0.00 | 0.00 | 0.00  | 0.00  | 0.00 | 0.00 |
| SER 301 | 0.00 | 0.00 | 0.00  | 0.00  | 0.00 | 0.00 |
| GLY 302 | 0.00 | 0.00 | 0.00  | 0.00  | 0.00 | 0.00 |
| VAL 303 | 0.00 | 0.00 | 0.00  | 0.00  | 0.00 | 0.00 |
| THR 304 | 0.00 | 0.00 | 0.00  | 0.00  | 0.00 | 0.00 |
| PHE 305 | 0.00 | 0.00 | 0.00  | 0.00  | 0.00 | 0.00 |
| GLN 306 | 0.00 | 0.00 | -0.01 | 0.01  | 0.00 | 0.00 |

**Table S8:** Total Energy Decomposition using MM/GBSA method for PL<sup>pro</sup> (PhSe)<sub>2</sub> complex.

Total Energy Decomposition:

| Residue | Internal<br>Avg. | van der Waals<br>Avg. | Electrostatic<br>Avg. | Polar Solvation<br>Avg. | Non-Polar Solv.<br>Avg. | TOTAL |
|---------|------------------|-----------------------|-----------------------|-------------------------|-------------------------|-------|
| THR 1   | 0.00             | 0.00                  | 0.03                  | -0.03                   | 0.00                    | 0.00  |
| ILE 2   | 0.00             | 0.00                  | 0.00                  | 0.00                    | 0.00                    | 0.00  |
| LYS 3   | 0.00             | 0.00                  | 0.03                  | -0.03                   | 0.00                    | 0.00  |
| VAL 4   | 0.00             | 0.00                  | 0.00                  | 0.00                    | 0.00                    | 0.00  |

|        |      |      |       |      |      |      |
|--------|------|------|-------|------|------|------|
| PHE 5  | 0.00 | 0.00 | 0.00  | 0.00 | 0.00 | 0.00 |
| THR 6  | 0.00 | 0.00 | 0.00  | 0.00 | 0.00 | 0.00 |
| THR 7  | 0.00 | 0.00 | 0.00  | 0.00 | 0.00 | 0.00 |
| VAL 8  | 0.00 | 0.00 | 0.00  | 0.00 | 0.00 | 0.00 |
| ASP 9  | 0.00 | 0.00 | -0.05 | 0.05 | 0.00 | 0.00 |
| ASN 10 | 0.00 | 0.00 | 0.00  | 0.00 | 0.00 | 0.00 |
| ILE 11 | 0.00 | 0.00 | 0.00  | 0.00 | 0.00 | 0.00 |
| ASN 12 | 0.00 | 0.00 | 0.00  | 0.00 | 0.00 | 0.00 |
| LEU 13 | 0.00 | 0.00 | 0.00  | 0.00 | 0.00 | 0.00 |
| HIE 14 | 0.00 | 0.00 | 0.00  | 0.00 | 0.00 | 0.00 |
| THR 15 | 0.00 | 0.00 | 0.00  | 0.00 | 0.00 | 0.00 |
| GLN 16 | 0.00 | 0.00 | 0.00  | 0.00 | 0.00 | 0.00 |
| VAL 17 | 0.00 | 0.00 | 0.00  | 0.00 | 0.00 | 0.00 |
| VAL 18 | 0.00 | 0.00 | 0.00  | 0.00 | 0.00 | 0.00 |
| ASP 19 | 0.00 | 0.00 | -0.03 | 0.03 | 0.00 | 0.00 |
| MET 20 | 0.00 | 0.00 | 0.00  | 0.00 | 0.00 | 0.00 |
| SER 21 | 0.00 | 0.00 | 0.00  | 0.00 | 0.00 | 0.00 |
| MET 22 | 0.00 | 0.00 | 0.00  | 0.00 | 0.00 | 0.00 |
| THR 23 | 0.00 | 0.00 | 0.00  | 0.00 | 0.00 | 0.00 |
| TYR 24 | 0.00 | 0.00 | 0.00  | 0.00 | 0.00 | 0.00 |
| GLY 25 | 0.00 | 0.00 | 0.00  | 0.00 | 0.00 | 0.00 |
| GLN 26 | 0.00 | 0.00 | 0.00  | 0.00 | 0.00 | 0.00 |
| GLN 27 | 0.00 | 0.00 | 0.00  | 0.00 | 0.00 | 0.00 |
| PHE 28 | 0.00 | 0.00 | 0.00  | 0.00 | 0.00 | 0.00 |
| GLY 29 | 0.00 | 0.00 | 0.00  | 0.00 | 0.00 | 0.00 |
| PRO 30 | 0.00 | 0.00 | 0.00  | 0.00 | 0.00 | 0.00 |
| THR 31 | 0.00 | 0.00 | 0.00  | 0.00 | 0.00 | 0.00 |
| TYR 32 | 0.00 | 0.00 | 0.00  | 0.00 | 0.00 | 0.00 |
| LEU 33 | 0.00 | 0.00 | 0.00  | 0.00 | 0.00 | 0.00 |
| ASP 34 | 0.00 | 0.00 | -0.07 | 0.07 | 0.00 | 0.00 |
| GLY 35 | 0.00 | 0.00 | 0.00  | 0.00 | 0.00 | 0.00 |

|        |      |      |       |       |      |      |
|--------|------|------|-------|-------|------|------|
| ALA 36 | 0.00 | 0.00 | 0.00  | 0.00  | 0.00 | 0.00 |
| ASP 37 | 0.00 | 0.00 | -0.07 | 0.07  | 0.00 | 0.00 |
| VAL 38 | 0.00 | 0.00 | 0.00  | 0.00  | 0.00 | 0.00 |
| THR 39 | 0.00 | 0.00 | 0.00  | 0.00  | 0.00 | 0.00 |
| LYS 40 | 0.00 | 0.00 | 0.06  | -0.06 | 0.00 | 0.00 |
| ILE 41 | 0.00 | 0.00 | 0.00  | 0.00  | 0.00 | 0.00 |
| LYS 42 | 0.00 | 0.00 | 0.03  | -0.03 | 0.00 | 0.00 |
| PRO 43 | 0.00 | 0.00 | 0.00  | 0.00  | 0.00 | 0.00 |
| HIE 44 | 0.00 | 0.00 | 0.00  | 0.00  | 0.00 | 0.00 |
| ASN 45 | 0.00 | 0.00 | 0.00  | 0.00  | 0.00 | 0.00 |
| SER 46 | 0.00 | 0.00 | 0.00  | 0.00  | 0.00 | 0.00 |
| HIE 47 | 0.00 | 0.00 | 0.00  | 0.00  | 0.00 | 0.00 |
| GLU 48 | 0.00 | 0.00 | -0.03 | 0.03  | 0.00 | 0.00 |
| GLY 49 | 0.00 | 0.00 | 0.00  | 0.00  | 0.00 | 0.00 |
| LYS 50 | 0.00 | 0.00 | 0.04  | -0.04 | 0.00 | 0.00 |
| THR 51 | 0.00 | 0.00 | 0.00  | 0.00  | 0.00 | 0.00 |
| PHE 52 | 0.00 | 0.00 | 0.00  | 0.00  | 0.00 | 0.00 |
| TYR 53 | 0.00 | 0.00 | 0.00  | 0.00  | 0.00 | 0.00 |
| VAL 54 | 0.00 | 0.00 | 0.00  | 0.00  | 0.00 | 0.00 |
| LEU 55 | 0.00 | 0.00 | 0.00  | 0.00  | 0.00 | 0.00 |
| PRO 56 | 0.00 | 0.00 | 0.00  | 0.00  | 0.00 | 0.00 |
| ASN 57 | 0.00 | 0.00 | 0.00  | 0.00  | 0.00 | 0.00 |
| ASP 58 | 0.00 | 0.00 | -0.04 | 0.04  | 0.00 | 0.00 |
| ASP 59 | 0.00 | 0.00 | -0.04 | 0.04  | 0.00 | 0.00 |
| THR 60 | 0.00 | 0.00 | 0.00  | 0.00  | 0.00 | 0.00 |
| LEU 61 | 0.00 | 0.00 | 0.00  | 0.00  | 0.00 | 0.00 |
| ARG 62 | 0.00 | 0.00 | 0.05  | -0.05 | 0.00 | 0.00 |
| VAL 63 | 0.00 | 0.00 | 0.00  | 0.00  | 0.00 | 0.00 |
| GLU 64 | 0.00 | 0.00 | -0.04 | 0.04  | 0.00 | 0.00 |
| ALA 65 | 0.00 | 0.00 | 0.00  | 0.00  | 0.00 | 0.00 |
| PHE 66 | 0.00 | 0.00 | 0.00  | 0.00  | 0.00 | 0.00 |

|        |      |       |       |       |      |      |
|--------|------|-------|-------|-------|------|------|
| GLU 67 | 0.00 | 0.00  | -0.04 | 0.04  | 0.00 | 0.00 |
| TYR 68 | 0.00 | 0.00  | 0.00  | 0.00  | 0.00 | 0.00 |
| TYR 69 | 0.00 | 0.00  | 0.00  | 0.00  | 0.00 | 0.00 |
| HIE 70 | 0.00 | 0.00  | 0.00  | 0.00  | 0.00 | 0.00 |
| THR 71 | 0.00 | 0.00  | 0.00  | 0.00  | 0.00 | 0.00 |
| THR 72 | 0.00 | 0.00  | 0.00  | 0.00  | 0.00 | 0.00 |
| ASP 73 | 0.00 | 0.00  | -0.10 | 0.10  | 0.00 | 0.00 |
| PRO 74 | 0.00 | 0.00  | 0.00  | 0.00  | 0.00 | 0.00 |
| SER 75 | 0.00 | 0.00  | 0.00  | 0.00  | 0.00 | 0.00 |
| PHE 76 | 0.00 | 0.00  | 0.00  | 0.00  | 0.00 | 0.00 |
| LEU 77 | 0.00 | 0.00  | 0.00  | 0.00  | 0.00 | 0.00 |
| GLY 78 | 0.00 | 0.00  | 0.00  | 0.00  | 0.00 | 0.00 |
| ARG 79 | 0.00 | 0.00  | 0.14  | -0.13 | 0.00 | 0.01 |
| TYR 80 | 0.00 | 0.00  | -0.01 | 0.01  | 0.00 | 0.00 |
| MET 81 | 0.00 | 0.00  | 0.00  | 0.00  | 0.00 | 0.00 |
| SER 82 | 0.00 | 0.00  | 0.00  | 0.00  | 0.00 | 0.00 |
| ALA 83 | 0.00 | 0.00  | 0.00  | 0.00  | 0.00 | 0.00 |
| LEU 84 | 0.00 | 0.00  | 0.00  | 0.00  | 0.00 | 0.00 |
| ASN 85 | 0.00 | 0.00  | 0.00  | 0.00  | 0.00 | 0.00 |
| HIE 86 | 0.00 | 0.00  | 0.01  | 0.00  | 0.00 | 0.00 |
| THR 87 | 0.00 | 0.00  | 0.01  | 0.00  | 0.00 | 0.00 |
| LYS 88 | 0.00 | 0.00  | 0.09  | -0.08 | 0.00 | 0.00 |
| LYS 89 | 0.00 | 0.00  | 0.12  | -0.11 | 0.00 | 0.00 |
| TRP 90 | 0.00 | -0.01 | 0.01  | 0.00  | 0.00 | 0.00 |
| LYS 91 | 0.00 | 0.00  | 0.08  | -0.07 | 0.00 | 0.00 |
| TYR 92 | 0.00 | 0.00  | 0.00  | 0.00  | 0.00 | 0.00 |
| PRO 93 | 0.00 | 0.00  | 0.00  | 0.00  | 0.00 | 0.00 |
| GLN 94 | 0.00 | 0.00  | 0.00  | 0.00  | 0.00 | 0.00 |
| VAL 95 | 0.00 | 0.00  | 0.00  | 0.00  | 0.00 | 0.00 |
| ASN 96 | 0.00 | 0.00  | 0.00  | 0.00  | 0.00 | 0.00 |
| GLY 97 | 0.00 | 0.00  | 0.00  | 0.00  | 0.00 | 0.00 |

|         |      |       |       |       |       |       |
|---------|------|-------|-------|-------|-------|-------|
| LEU 98  | 0.00 | 0.00  | 0.00  | 0.00  | 0.00  | 0.00  |
| THR 99  | 0.00 | 0.00  | 0.00  | 0.00  | 0.00  | 0.00  |
| SER 100 | 0.00 | 0.00  | 0.00  | 0.01  | 0.00  | 0.00  |
| ILE 101 | 0.00 | -0.01 | 0.00  | 0.00  | 0.00  | 0.00  |
| LYS 102 | 0.00 | 0.00  | 0.09  | -0.09 | 0.00  | 0.00  |
| TRP 103 | 0.00 | -0.22 | 0.07  | 0.07  | -0.03 | -0.11 |
| ALA 104 | 0.00 | -0.01 | -0.03 | 0.04  | 0.00  | 0.00  |
| ASP 105 | 0.00 | -0.03 | -0.26 | 0.29  | 0.00  | -0.01 |
| ASN 106 | 0.00 | -0.68 | -0.57 | 0.93  | -0.05 | -0.36 |
| ASN 107 | 0.00 | -0.10 | 0.01  | -0.02 | 0.00  | -0.12 |
| CYS 108 | 0.00 | -0.38 | 0.11  | 0.01  | -0.04 | -0.31 |
| TYR 109 | 0.00 | -0.72 | 0.18  | 0.03  | -0.02 | -0.53 |
| LEU 110 | 0.00 | -0.05 | 0.07  | -0.05 | 0.00  | -0.03 |
| ALA 111 | 0.00 | -0.01 | 0.02  | -0.03 | 0.00  | -0.01 |
| THR 112 | 0.00 | -0.02 | 0.03  | -0.05 | 0.00  | -0.04 |
| ALA 113 | 0.00 | -0.01 | 0.02  | -0.02 | 0.00  | 0.00  |
| LEU 114 | 0.00 | 0.00  | 0.01  | -0.01 | 0.00  | 0.00  |
| LEU 115 | 0.00 | 0.00  | 0.00  | 0.00  | 0.00  | 0.00  |
| THR 116 | 0.00 | 0.00  | 0.01  | 0.00  | 0.00  | 0.00  |
| LEU 117 | 0.00 | 0.00  | 0.00  | 0.00  | 0.00  | 0.00  |
| GLN 118 | 0.00 | 0.00  | 0.00  | 0.00  | 0.00  | 0.00  |
| GLN 119 | 0.00 | 0.00  | 0.00  | 0.00  | 0.00  | 0.00  |
| ILE 120 | 0.00 | 0.00  | 0.00  | 0.00  | 0.00  | 0.00  |
| GLU 121 | 0.00 | 0.00  | -0.01 | 0.01  | 0.00  | 0.00  |
| LEU 122 | 0.00 | 0.00  | 0.00  | 0.00  | 0.00  | 0.00  |
| LYS 123 | 0.00 | 0.00  | 0.02  | -0.02 | 0.00  | 0.00  |
| PHE 124 | 0.00 | 0.00  | 0.00  | 0.00  | 0.00  | 0.00  |
| ASN 125 | 0.00 | 0.00  | 0.00  | 0.00  | 0.00  | 0.00  |
| PRO 126 | 0.00 | 0.00  | 0.00  | 0.00  | 0.00  | 0.00  |
| PRO 127 | 0.00 | 0.00  | 0.00  | 0.00  | 0.00  | 0.00  |
| ALA 128 | 0.00 | 0.00  | 0.00  | 0.00  | 0.00  | 0.00  |



|         |      |       |       |       |       |       |
|---------|------|-------|-------|-------|-------|-------|
| LEU 129 | 0.00 | 0.00  | 0.00  | 0.00  | 0.00  | 0.00  |
| GLN 130 | 0.00 | 0.00  | 0.00  | 0.00  | 0.00  | 0.00  |
| ASP 131 | 0.00 | 0.00  | -0.05 | 0.05  | 0.00  | 0.00  |
| ALA 132 | 0.00 | 0.00  | 0.00  | 0.00  | 0.00  | 0.00  |
| TYR 133 | 0.00 | 0.00  | 0.00  | 0.00  | 0.00  | 0.00  |
| TYR 134 | 0.00 | 0.00  | 0.00  | 0.00  | 0.00  | 0.00  |
| ARG 135 | 0.00 | 0.00  | 0.06  | -0.06 | 0.00  | 0.00  |
| ALA 136 | 0.00 | 0.00  | 0.00  | 0.00  | 0.00  | 0.00  |
| ARG 137 | 0.00 | 0.00  | 0.03  | -0.03 | 0.00  | 0.00  |
| ALA 138 | 0.00 | 0.00  | 0.00  | 0.00  | 0.00  | 0.00  |
| GLY 139 | 0.00 | 0.00  | 0.00  | 0.00  | 0.00  | 0.00  |
| GLU 140 | 0.00 | 0.00  | -0.07 | 0.07  | 0.00  | 0.00  |
| ALA 141 | 0.00 | 0.00  | 0.00  | 0.00  | 0.00  | 0.00  |
| ALA 142 | 0.00 | 0.00  | -0.01 | 0.01  | 0.00  | 0.00  |
| ASN 143 | 0.00 | 0.00  | -0.01 | 0.01  | 0.00  | 0.00  |
| PHE 144 | 0.00 | 0.00  | -0.01 | 0.01  | 0.00  | 0.00  |
| CYS 145 | 0.00 | 0.00  | -0.01 | 0.01  | 0.00  | 0.00  |
| ALA 146 | 0.00 | 0.00  | -0.01 | 0.01  | 0.00  | 0.00  |
| LEU 147 | 0.00 | 0.00  | -0.01 | 0.01  | 0.00  | 0.00  |
| ILE 148 | 0.00 | -0.01 | 0.00  | 0.00  | 0.00  | -0.01 |
| LEU 149 | 0.00 | -0.01 | 0.00  | 0.01  | 0.00  | -0.01 |
| ALA 150 | 0.00 | 0.00  | -0.01 | 0.01  | 0.00  | 0.00  |
| TYR 151 | 0.00 | 0.00  | 0.00  | 0.00  | 0.00  | 0.00  |
| CYS 152 | 0.00 | -0.01 | -0.01 | 0.03  | 0.00  | 0.00  |
| ASN 153 | 0.00 | -0.01 | -0.01 | 0.03  | 0.00  | 0.01  |
| LYS 154 | 0.00 | -0.16 | 0.69  | -0.30 | -0.05 | 0.18  |
| THR 155 | 0.00 | -0.01 | -0.01 | 0.04  | 0.00  | 0.01  |
| VAL 156 | 0.00 | -0.01 | 0.01  | -0.01 | 0.00  | 0.00  |
| GLY 157 | 0.00 | -0.03 | 0.05  | -0.02 | 0.00  | -0.01 |
| GLU 158 | 0.00 | -0.17 | -0.41 | 0.56  | 0.00  | -0.03 |
| LEU 159 | 0.00 | -2.76 | -0.43 | 0.67  | -0.35 | -2.87 |

|         |      |       |       |       |       |       |
|---------|------|-------|-------|-------|-------|-------|
| GLY 160 | 0.00 | -1.33 | 0.00  | 0.99  | -0.10 | -0.44 |
| ASP 161 | 0.00 | -0.93 | 0.10  | 0.17  | -0.13 | -0.79 |
| VAL 162 | 0.00 | -0.12 | -0.10 | 0.10  | 0.00  | -0.11 |
| ARG 163 | 0.00 | -0.04 | -0.31 | 0.34  | 0.00  | -0.01 |
| GLU 164 | 0.00 | -0.08 | -0.38 | 0.54  | -0.01 | 0.07  |
| THR 165 | 0.00 | -0.03 | -0.03 | 0.04  | 0.00  | -0.02 |
| MET 166 | 0.00 | -0.01 | -0.01 | 0.02  | 0.00  | 0.00  |
| SER 167 | 0.00 | 0.00  | 0.01  | 0.00  | 0.00  | 0.01  |
| TYR 168 | 0.00 | -0.01 | 0.01  | 0.00  | 0.00  | 0.00  |
| LEU 169 | 0.00 | 0.00  | 0.00  | 0.00  | 0.00  | 0.00  |
| PHE 170 | 0.00 | 0.00  | 0.00  | 0.00  | 0.00  | 0.00  |
| GLN 171 | 0.00 | 0.00  | 0.00  | 0.00  | 0.00  | 0.00  |
| HID 172 | 0.00 | 0.00  | 0.00  | 0.00  | 0.00  | 0.00  |
| ALA 173 | 0.00 | 0.00  | 0.00  | 0.00  | 0.00  | 0.00  |
| ASN 174 | 0.00 | 0.00  | 0.00  | 0.00  | 0.00  | 0.00  |
| LEU 175 | 0.00 | 0.00  | 0.00  | 0.00  | 0.00  | 0.00  |
| ASP 176 | 0.00 | 0.00  | -0.02 | 0.02  | 0.00  | 0.00  |
| SER 177 | 0.00 | 0.00  | 0.00  | 0.00  | 0.00  | 0.00  |
| CYS 178 | 0.00 | 0.00  | 0.00  | 0.00  | 0.00  | 0.00  |
| LYS 179 | 0.00 | 0.00  | -0.01 | 0.01  | 0.00  | 0.00  |
| ARG 180 | 0.00 | 0.00  | -0.04 | 0.04  | 0.00  | 0.00  |
| VAL 181 | 0.00 | 0.00  | 0.00  | 0.00  | 0.00  | 0.00  |
| LEU 182 | 0.00 | 0.00  | 0.00  | 0.00  | 0.00  | 0.00  |
| ASN 183 | 0.00 | 0.00  | 0.00  | 0.00  | 0.00  | 0.00  |
| VAL 184 | 0.00 | 0.00  | 0.00  | 0.00  | 0.00  | 0.00  |
| VAL 185 | 0.00 | 0.00  | 0.00  | 0.00  | 0.00  | 0.00  |
| CY1 186 | 0.00 | 0.00  | 0.02  | -0.02 | 0.00  | 0.00  |
| LYS 187 | 0.00 | 0.00  | -0.03 | 0.03  | 0.00  | 0.00  |
| THR 188 | 0.00 | 0.00  | 0.00  | 0.00  | 0.00  | 0.00  |
| CY1 189 | 0.00 | 0.00  | 0.02  | -0.02 | 0.00  | 0.00  |
| GLY 190 | 0.00 | 0.00  | 0.00  | 0.00  | 0.00  | 0.00  |

|         |      |      |       |       |      |      |
|---------|------|------|-------|-------|------|------|
| GLN 191 | 0.00 | 0.00 | 0.00  | 0.00  | 0.00 | 0.00 |
| GLN 192 | 0.00 | 0.00 | 0.00  | 0.00  | 0.00 | 0.00 |
| GLN 193 | 0.00 | 0.00 | 0.00  | 0.00  | 0.00 | 0.00 |
| THR 194 | 0.00 | 0.00 | 0.00  | 0.00  | 0.00 | 0.00 |
| THR 195 | 0.00 | 0.00 | 0.00  | 0.00  | 0.00 | 0.00 |
| LEU 196 | 0.00 | 0.00 | 0.00  | 0.00  | 0.00 | 0.00 |
| LYS 197 | 0.00 | 0.00 | 0.00  | 0.00  | 0.00 | 0.00 |
| GLY 198 | 0.00 | 0.00 | 0.00  | 0.00  | 0.00 | 0.00 |
| VAL 199 | 0.00 | 0.00 | 0.01  | 0.00  | 0.00 | 0.00 |
| GLU 200 | 0.00 | 0.00 | 0.02  | -0.01 | 0.00 | 0.00 |
| ALA 201 | 0.00 | 0.00 | 0.00  | 0.00  | 0.00 | 0.00 |
| VAL 202 | 0.00 | 0.00 | 0.00  | 0.00  | 0.00 | 0.00 |
| MET 203 | 0.00 | 0.00 | -0.01 | 0.01  | 0.00 | 0.00 |
| TYR 204 | 0.00 | 0.00 | 0.00  | 0.00  | 0.00 | 0.00 |
| MET 205 | 0.00 | 0.00 | -0.01 | 0.01  | 0.00 | 0.00 |
| GLY 206 | 0.00 | 0.00 | 0.00  | 0.01  | 0.00 | 0.00 |
| THR 207 | 0.00 | 0.00 | 0.00  | 0.01  | 0.00 | 0.00 |
| LEU 208 | 0.00 | 0.00 | -0.01 | 0.01  | 0.00 | 0.00 |
| SER 209 | 0.00 | 0.00 | 0.00  | 0.00  | 0.00 | 0.00 |
| TYR 210 | 0.00 | 0.00 | 0.00  | 0.00  | 0.00 | 0.00 |
| GLU 211 | 0.00 | 0.00 | 0.05  | -0.05 | 0.00 | 0.00 |
| GLN 212 | 0.00 | 0.00 | 0.00  | 0.00  | 0.00 | 0.00 |
| PHE 213 | 0.00 | 0.00 | 0.00  | 0.00  | 0.00 | 0.00 |
| LYS 214 | 0.00 | 0.00 | -0.04 | 0.04  | 0.00 | 0.00 |
| LYS 215 | 0.00 | 0.00 | -0.05 | 0.05  | 0.00 | 0.00 |
| GLY 216 | 0.00 | 0.00 | 0.00  | 0.00  | 0.00 | 0.00 |
| VAL 217 | 0.00 | 0.00 | 0.00  | 0.00  | 0.00 | 0.00 |
| GLN 218 | 0.00 | 0.00 | 0.00  | 0.00  | 0.00 | 0.00 |
| ILE 219 | 0.00 | 0.00 | 0.00  | 0.00  | 0.00 | 0.00 |
| PRO 220 | 0.00 | 0.00 | 0.00  | 0.00  | 0.00 | 0.00 |
| CY1 221 | 0.00 | 0.00 | 0.03  | -0.03 | 0.00 | 0.00 |

|         |      |       |       |       |      |       |
|---------|------|-------|-------|-------|------|-------|
| THR 222 | 0.00 | 0.00  | 0.00  | 0.00  | 0.00 | 0.00  |
| CY1 223 | 0.00 | 0.00  | 0.02  | -0.02 | 0.00 | 0.00  |
| GLY 224 | 0.00 | 0.00  | 0.00  | 0.00  | 0.00 | 0.00  |
| LYS 225 | 0.00 | 0.00  | -0.04 | 0.04  | 0.00 | 0.00  |
| GLN 226 | 0.00 | 0.00  | 0.00  | 0.00  | 0.00 | 0.00  |
| ALA 227 | 0.00 | 0.00  | 0.00  | 0.00  | 0.00 | 0.00  |
| THR 228 | 0.00 | 0.00  | 0.00  | 0.00  | 0.00 | 0.00  |
| LYS 229 | 0.00 | 0.00  | -0.05 | 0.05  | 0.00 | 0.00  |
| TYR 230 | 0.00 | 0.00  | 0.00  | 0.00  | 0.00 | 0.00  |
| LEU 231 | 0.00 | 0.00  | 0.00  | 0.00  | 0.00 | 0.00  |
| VAL 232 | 0.00 | 0.00  | 0.00  | 0.00  | 0.00 | 0.00  |
| GLN 233 | 0.00 | 0.00  | 0.00  | 0.00  | 0.00 | 0.00  |
| GLN 234 | 0.00 | 0.00  | 0.00  | 0.00  | 0.00 | 0.00  |
| GLU 235 | 0.00 | 0.00  | 0.01  | -0.01 | 0.00 | 0.00  |
| SER 236 | 0.00 | 0.00  | 0.00  | 0.00  | 0.00 | 0.00  |
| PRO 237 | 0.00 | 0.00  | 0.00  | 0.00  | 0.00 | 0.00  |
| PHE 238 | 0.00 | 0.00  | 0.00  | 0.00  | 0.00 | 0.00  |
| VAL 239 | 0.00 | 0.00  | 0.00  | 0.00  | 0.00 | 0.00  |
| MET 240 | 0.00 | 0.00  | -0.01 | 0.01  | 0.00 | 0.00  |
| MET 241 | 0.00 | 0.00  | 0.00  | 0.00  | 0.00 | 0.00  |
| SER 242 | 0.00 | 0.00  | -0.03 | 0.03  | 0.00 | 0.00  |
| ALA 243 | 0.00 | 0.00  | 0.02  | -0.01 | 0.00 | 0.00  |
| PRO 244 | 0.00 | -0.01 | -0.04 | 0.04  | 0.00 | 0.00  |
| PRO 245 | 0.00 | -0.02 | -0.03 | 0.03  | 0.00 | -0.02 |
| ALA 246 | 0.00 | 0.00  | 0.01  | -0.01 | 0.00 | 0.00  |
| GLN 247 | 0.00 | 0.00  | 0.01  | -0.01 | 0.00 | 0.00  |
| TYR 248 | 0.00 | 0.00  | 0.00  | 0.00  | 0.00 | 0.00  |
| GLU 249 | 0.00 | 0.00  | 0.10  | -0.09 | 0.00 | 0.00  |
| LEU 250 | 0.00 | 0.00  | 0.00  | 0.00  | 0.00 | 0.00  |
| LYS 251 | 0.00 | 0.00  | -0.06 | 0.06  | 0.00 | 0.00  |
| HID 252 | 0.00 | 0.00  | 0.00  | 0.00  | 0.00 | 0.00  |

|         |      |       |       |       |       |       |
|---------|------|-------|-------|-------|-------|-------|
| GLY 253 | 0.00 | 0.00  | 0.00  | 0.00  | 0.00  | 0.00  |
| THR 254 | 0.00 | 0.00  | 0.00  | 0.00  | 0.00  | 0.00  |
| PHE 255 | 0.00 | 0.00  | 0.00  | 0.00  | 0.00  | 0.00  |
| THR 256 | 0.00 | 0.00  | 0.00  | 0.00  | 0.00  | 0.00  |
| CYS 257 | 0.00 | 0.00  | 0.00  | 0.00  | 0.00  | 0.00  |
| ALA 258 | 0.00 | 0.00  | -0.01 | 0.01  | 0.00  | 0.00  |
| SER 259 | 0.00 | -0.01 | -0.02 | 0.02  | 0.00  | -0.01 |
| GLU 260 | 0.00 | -0.02 | 0.32  | -0.30 | 0.00  | 0.01  |
| TYR 261 | 0.00 | -0.85 | 0.18  | 0.17  | -0.08 | -0.57 |
| THR 262 | 0.00 | -0.04 | 0.04  | 0.00  | 0.00  | 0.00  |
| GLY 263 | 0.00 | -0.03 | 0.04  | 0.00  | 0.00  | 0.01  |
| ASN 264 | 0.00 | -0.09 | 0.19  | -0.14 | 0.00  | -0.03 |
| TYR 265 | 0.00 | -0.49 | -0.20 | 0.36  | -0.05 | -0.39 |
| GLN 266 | 0.00 | -1.94 | -0.95 | 1.68  | -0.31 | -1.52 |
| CYS 267 | 0.00 | -0.54 | -0.12 | 0.23  | -0.01 | -0.44 |
| GLY 268 | 0.00 | -0.58 | -0.67 | 1.23  | -0.11 | -0.13 |
| HIE 269 | 0.00 | -0.58 | -0.15 | 0.29  | -0.02 | -0.46 |
| TYR 270 | 0.00 | -1.33 | 0.03  | 0.47  | -0.13 | -0.97 |
| LYS 271 | 0.00 | -0.02 | -0.16 | 0.21  | 0.00  | 0.03  |
| HID 272 | 0.00 | 0.00  | -0.01 | 0.01  | 0.00  | 0.00  |
| ILE 273 | 0.00 | 0.00  | 0.00  | 0.00  | 0.00  | 0.00  |
| THR 274 | 0.00 | 0.00  | 0.00  | 0.00  | 0.00  | 0.00  |
| SER 275 | 0.00 | 0.00  | 0.00  | 0.00  | 0.00  | 0.00  |
| LYS 276 | 0.00 | 0.00  | -0.01 | 0.01  | 0.00  | 0.00  |
| GLU 277 | 0.00 | 0.00  | 0.02  | -0.02 | 0.00  | 0.00  |
| THR 278 | 0.00 | 0.00  | 0.00  | 0.00  | 0.00  | 0.00  |
| LEU 279 | 0.00 | 0.00  | 0.00  | 0.00  | 0.00  | 0.00  |
| TYR 280 | 0.00 | 0.00  | 0.00  | 0.00  | 0.00  | 0.00  |
| CYS 281 | 0.00 | 0.00  | -0.01 | 0.01  | 0.00  | 0.00  |
| ILE 282 | 0.00 | 0.00  | 0.01  | -0.01 | 0.00  | 0.00  |
| ASP 283 | 0.00 | -0.01 | -0.02 | 0.07  | 0.00  | 0.04  |

|         |      |       |       |       |      |       |
|---------|------|-------|-------|-------|------|-------|
| GLY 284 | 0.00 | 0.00  | 0.01  | -0.01 | 0.00 | 0.00  |
| ALA 285 | 0.00 | 0.00  | 0.01  | 0.00  | 0.00 | 0.00  |
| LEU 286 | 0.00 | 0.00  | 0.00  | 0.00  | 0.00 | 0.00  |
| LEU 287 | 0.00 | 0.00  | 0.00  | 0.00  | 0.00 | 0.00  |
| THR 288 | 0.00 | 0.00  | 0.00  | 0.00  | 0.00 | 0.00  |
| LYS 289 | 0.00 | 0.00  | -0.02 | 0.02  | 0.00 | 0.00  |
| SER 290 | 0.00 | 0.00  | 0.00  | 0.00  | 0.00 | 0.00  |
| SER 291 | 0.00 | 0.00  | 0.00  | 0.00  | 0.00 | 0.00  |
| GLU 292 | 0.00 | 0.00  | 0.06  | -0.06 | 0.00 | 0.00  |
| TYR 293 | 0.00 | 0.00  | -0.01 | 0.01  | 0.00 | 0.00  |
| LYS 294 | 0.00 | 0.00  | -0.11 | 0.11  | 0.00 | 0.00  |
| GLY 295 | 0.00 | 0.00  | -0.01 | 0.01  | 0.00 | 0.00  |
| PRO 296 | 0.00 | -0.01 | 0.03  | -0.02 | 0.00 | 0.00  |
| ILE 297 | 0.00 | 0.00  | 0.01  | -0.01 | 0.00 | 0.00  |
| THR 298 | 0.00 | -0.02 | 0.01  | 0.00  | 0.00 | -0.01 |
| ASP 299 | 0.00 | -0.01 | 0.28  | -0.25 | 0.00 | 0.02  |
| VAL 300 | 0.00 | 0.00  | 0.00  | 0.00  | 0.00 | 0.00  |
| PHE 301 | 0.00 | 0.00  | 0.00  | 0.00  | 0.00 | 0.00  |
| TYR 302 | 0.00 | 0.00  | 0.00  | 0.00  | 0.00 | 0.00  |
| LYS 303 | 0.00 | 0.00  | -0.01 | 0.01  | 0.00 | 0.00  |
| GLU 304 | 0.00 | 0.00  | 0.03  | -0.03 | 0.00 | 0.00  |
| ASN 305 | 0.00 | 0.00  | 0.00  | 0.00  | 0.00 | 0.00  |
| SER 306 | 0.00 | 0.00  | 0.00  | 0.00  | 0.00 | 0.00  |
| TYR 307 | 0.00 | 0.00  | 0.00  | 0.00  | 0.00 | 0.00  |
| THR 308 | 0.00 | 0.00  | 0.00  | 0.00  | 0.00 | 0.00  |
| THR 309 | 0.00 | 0.00  | 0.00  | 0.00  | 0.00 | 0.00  |
| THR 310 | 0.00 | 0.00  | 0.00  | 0.00  | 0.00 | 0.00  |
| ILE 311 | 0.00 | 0.00  | 0.00  | 0.00  | 0.00 | 0.00  |
| LYS 312 | 0.00 | 0.00  | 0.00  | 0.00  | 0.00 | 0.00  |
| ZN1 313 | 0.00 | 0.00  | -0.02 | 0.02  | 0.00 | 0.00  |

**Table S9** The calculated binding free energies using MM/PBSA method for M<sup>Pro</sup> DPDS complex along the whole 200 ns trajectory.

| Energy<br>(Kcal/mol)   | PBSA   |      |
|------------------------|--------|------|
|                        | Mean   | Std  |
| $\Delta E_{vdw}$       | -29.07 | 3.50 |
| $\Delta E_{ele}$       | -0.16  | 0.74 |
| $\Delta G_{pol}$ [EPB] | 7.86   | 1.95 |
| $\Delta G_{enpolar}$   | -20.27 | 1.69 |
| $\Delta G_{edisper}$   | 33.39  | 1.95 |
| $\Delta G_{bind}$      | -8.24  | 4.46 |

**Table S10** The calculated binding free energies using MM/PBSA method for M<sup>Pro</sup> DPDS complex for the last 50 ns.

| Energy<br>(Kcal/mol)   | PBSA   |      |
|------------------------|--------|------|
|                        | Mean   | Std  |
| $\Delta E_{vdw}$       | -26.37 | 2.33 |
| $\Delta E_{ele}$       | 0.19   | 0.73 |
| $\Delta G_{pol}$ [EPB] | 8.18   | 1.86 |
| $\Delta G_{enpolar}$   | -19.16 | 1.33 |
| $\Delta G_{edisper}$   | 32.18  | 1.33 |
| $\Delta G_{bind}$      | -5.00  | 3.11 |

**Table S11:** Cluster 1 at 88ns; Optimized coordinates at SMD(water)-D3BJ-B3LYP/6-311G(d,p),ccPVTZ. Constrained atoms (*first column = -1*):

1,2,3,4,5,6,7,8,9,10,22,23,24,25,26,27,28,29,30,31,32,33,34,35,36,37,38,39,51,52,53,54,55,56,57,58,59,60,61,62,63,64,65,66,67,68,74,75,76,77,78,79,80,  
81,82,83,84,85,86,87,88,89,90,91,103,104,105,106,107,108,109,110

A) **RC**

E= -8828.101079 Ha

G= -8827.679970 Ha

|   |    |             |            |             |
|---|----|-------------|------------|-------------|
| C | -1 | 0.74069200  | 5.59311200 | 4.86475600  |
| H | -1 | 1.24877200  | 6.36689900 | 5.44108600  |
| C | -1 | 1.73363400  | 4.97548900 | 3.90010900  |
| O | -1 | 2.84803000  | 4.63123400 | 4.24147000  |
| H | -1 | -0.13568300 | 6.02028400 | 4.37375800  |
| H | -1 | 0.41218900  | 4.82354600 | 5.56744000  |
| N | -1 | 1.28573300  | 4.85095200 | 2.59929000  |
| H | -1 | 0.29473900  | 4.98144400 | 2.44433600  |
| C | -1 | 1.98141000  | 4.14446900 | 1.64156900  |
| H | -1 | 3.01987900  | 4.09774700 | 1.98802200  |
| C | 0  | 1.48794600  | 2.70030000 | 1.40738500  |
| H | 0  | 2.12001700  | 2.24511200 | 0.64334000  |
| H | 0  | 1.64377300  | 2.14099800 | 2.33214300  |
| C | 0  | 0.05017000  | 2.61207700 | 1.00724800  |
| N | 0  | -0.93632400 | 2.14263600 | 1.85530700  |
| H | 0  | -0.77742100 | 1.75209900 | 2.77385900  |
| C | 0  | -2.12265100 | 2.18447400 | 1.19587600  |
| H | 0  | -3.04570000 | 1.84655600 | 1.63696800  |
| N | 0  | -1.97085800 | 2.68453200 | -0.01761700 |
| C | 0  | -0.61936800 | 2.94759900 | -0.14620400 |
| H | 0  | -0.20569400 | 3.35665100 | -1.05257700 |
| C | -1 | 2.04660700  | 4.94675200 | 0.29021700  |
| O | -1 | 2.17894200  | 4.38101900 | -0.78189100 |
| N | -1 | 1.97830800  | 6.29336400 | 0.43437300  |
| H | -1 | 1.87842400  | 6.65581100 | 1.36879600  |
| C | -1 | 2.09585200  | 7.20605500 | -0.68776500 |



|   |    |             |             |             |
|---|----|-------------|-------------|-------------|
| H | -1 | 2.17696800  | 6.60449500  | -1.59146300 |
| H | -1 | 1.21540100  | 7.84991800  | -0.76300200 |
| H | -1 | 2.98766800  | 7.83262000  | -0.59551400 |
| C | -1 | 10.32413000 | 2.74446200  | -3.06840300 |
| H | -1 | 11.23345700 | 3.33213400  | -2.94324600 |
| C | -1 | 10.13941500 | 1.86748100  | -1.84386600 |
| O | -1 | 10.32844300 | 2.27846200  | -0.71546700 |
| H | -1 | 10.37775200 | 2.18170200  | -4.00246600 |
| H | -1 | 9.48486700  | 3.44226100  | -3.12608800 |
| N | -1 | 9.75780600  | 0.57007100  | -2.10714700 |
| H | -1 | 9.43867300  | 0.35494500  | -3.04073700 |
| C | -1 | 9.27625400  | -0.32715500 | -1.02284400 |
| H | -1 | 9.55902400  | 0.17737700  | -0.09534800 |
| C | 0  | 7.75767900  | -0.52261500 | -1.06148300 |
| H | 0  | 7.47479100  | -1.03120000 | -1.98801100 |
| H | 0  | 7.48032400  | -1.17582800 | -0.23233300 |
| C | 0  | 7.02038000  | 0.81280500  | -0.95794200 |
| H | 0  | 7.34451300  | 1.37123200  | -0.07618600 |
| H | 0  | 7.22903900  | 1.43276800  | -1.83163500 |
| S | 0  | 5.19845000  | 0.67096900  | -0.89913200 |
| C | 0  | 4.95817900  | 0.20601000  | 0.84317500  |
| H | 0  | 3.88700400  | 0.07498200  | 0.99494700  |
| H | 0  | 5.46427200  | -0.73096200 | 1.07206500  |
| H | 0  | 5.32083100  | 0.99976400  | 1.49854200  |
| C | -1 | 10.05580300 | -1.67162500 | -1.05967600 |
| O | -1 | 9.59866600  | -2.67282200 | -0.53177900 |
| N | -1 | 11.26206000 | -1.62488700 | -1.67657800 |
| H | -1 | 11.54920200 | -0.73818900 | -2.05867500 |
| C | -1 | 12.16300600 | -2.76184100 | -1.71336800 |
| H | -1 | 11.63925300 | -3.61028900 | -1.27637800 |
| H | -1 | 12.44476400 | -3.00362300 | -2.74167600 |
| H | -1 | 13.07019900 | -2.56730100 | -1.13372000 |
| C | -1 | -8.71312800 | 1.08478300  | -4.11285600 |
| H | -1 | -9.63217100 | 1.51216600  | -4.51715500 |
| C | -1 | -8.43442100 | 1.71621900  | -2.76581300 |
| O | -1 | -9.25943900 | 1.68439000  | -1.85610300 |

|   |    |              |             |             |
|---|----|--------------|-------------|-------------|
| H | -1 | -7.90390200  | 1.21663000  | -4.83267900 |
| H | -1 | -8.88571600  | 0.01742900  | -3.96110500 |
| N | -1 | -7.22331200  | 2.30754000  | -2.62258300 |
| H | -1 | -6.57265300  | 2.29909200  | -3.39268500 |
| C | -1 | -6.73453500  | 2.80624800  | -1.34023600 |
| H | -1 | -7.07558600  | 2.09192200  | -0.58301800 |
| C | 0  | -5.21038800  | 2.81784200  | -1.35348000 |
| H | 0  | -4.84610600  | 3.54052000  | -2.08378700 |
| H | 0  | -4.84256600  | 3.10786500  | -0.37297800 |
| S | 0  | -4.51848500  | 1.15616700  | -1.74494700 |
| H | 0  | -3.31137000  | 1.44581400  | -1.20436500 |
| C | -1 | -7.24118400  | 4.20059700  | -0.90059700 |
| O | -1 | -6.47877500  | 5.13631700  | -0.71619000 |
| N | -1 | -8.58150700  | 4.24797600  | -0.71775600 |
| H | -1 | -9.10679800  | 3.39968900  | -0.91295600 |
| C | -1 | -9.27095400  | 5.45977200  | -0.31646000 |
| H | -1 | -9.78751500  | 5.31968200  | 0.63752900  |
| H | -1 | -8.52801800  | 6.24775700  | -0.20549400 |
| H | -1 | -10.00406200 | 5.76119000  | -1.07028500 |
| C | -1 | -5.55909200  | 0.13234100  | 1.68140000  |
| H | -1 | -5.42083000  | 0.84756800  | 0.86848900  |
| C | -1 | -4.70341000  | -1.07569400 | 1.36802700  |
| O | -1 | -3.47945900  | -1.00213800 | 1.29649300  |
| H | -1 | -6.62081500  | -0.09944700 | 1.77665100  |
| H | -1 | -5.20437300  | 0.58991300  | 2.60649400  |
| N | -1 | -5.37150100  | -2.23119300 | 1.15863600  |
| H | -1 | -6.37370200  | -2.26708300 | 1.28529800  |
| C | -1 | -4.73541900  | -3.46963400 | 0.84146700  |
| H | -1 | -4.00238100  | -3.27305700 | 0.05372800  |
| C | 0  | -3.91798200  | -4.03704800 | 2.05181300  |
| H | 0  | -3.79901200  | -3.23372000 | 2.78004200  |
| H | 0  | -4.47124500  | -4.84126300 | 2.54405600  |
| C | 0  | -2.54359500  | -4.50662000 | 1.59458200  |
| H | 0  | -2.62181000  | -5.34152600 | 0.89538200  |
| H | 0  | -2.03320800  | -3.68659800 | 1.08898800  |
| S | 0  | -1.49344800  | -5.02404400 | 2.99698700  |

|    |    |             |             |             |
|----|----|-------------|-------------|-------------|
| C  | 0  | 0.04307000  | -5.33511500 | 2.06968200  |
| H  | 0  | -0.10624700 | -6.12729000 | 1.33378200  |
| H  | 0  | 0.37562400  | -4.42483300 | 1.57223600  |
| H  | 0  | 0.80199900  | -5.64958400 | 2.78693600  |
| C  | -1 | -5.72382200 | -4.56702200 | 0.35857100  |
| O  | -1 | -6.86535400 | -4.62072600 | 0.78908400  |
| N  | -1 | -5.18451800 | -5.44753800 | -0.51801700 |
| H  | -1 | -4.27514900 | -5.23627300 | -0.90043000 |
| C  | -1 | -5.92699000 | -6.58062300 | -1.04161700 |
| H  | -1 | -6.88316700 | -6.61626100 | -0.52293000 |
| H  | -1 | -6.11080500 | -6.47084500 | -2.11432600 |
| H  | -1 | -5.38644700 | -7.51417700 | -0.86661900 |
| Se | 0  | -0.40211200 | -0.64384000 | -0.74235100 |
| Se | 0  | 0.24485600  | -1.29258600 | 1.40713900  |
| C  | 0  | -1.23775500 | -2.26220100 | -1.39855600 |
| C  | 0  | -2.44051300 | -2.13328800 | -2.09550000 |
| C  | 0  | -3.05041100 | -3.26229900 | -2.63982500 |
| C  | 0  | -2.47007600 | -4.51936300 | -2.47679500 |
| C  | 0  | -1.27699200 | -4.64463300 | -1.76463300 |
| C  | 0  | -0.65408000 | -3.51935900 | -1.23238600 |
| C  | 0  | 1.97381800  | -2.12969000 | 1.14046000  |
| C  | 0  | 2.61472400  | -2.58022000 | 2.29852900  |
| C  | 0  | 3.84880100  | -3.21785100 | 2.20033900  |
| C  | 0  | 4.44626100  | -3.41009800 | 0.95436700  |
| C  | 0  | 3.80144300  | -2.95555700 | -0.19349100 |
| C  | 0  | 2.56646000  | -2.31480400 | -0.10562400 |
| H  | 0  | -2.90099900 | -1.16017900 | -2.21093400 |
| H  | 0  | -3.98651100 | -3.15852200 | -3.17574000 |
| H  | 0  | -2.94728300 | -5.39717600 | -2.89713200 |
| H  | 0  | -0.82620200 | -5.62002900 | -1.62421200 |
| H  | 0  | 0.27045000  | -3.62401900 | -0.68172900 |
| H  | 0  | 2.15250700  | -2.43883100 | 3.26926400  |
| H  | 0  | 4.34243600  | -3.56428300 | 3.10099600  |
| H  | 0  | 5.40723400  | -3.90487500 | 0.88053900  |
| H  | 0  | 4.26070900  | -3.09132800 | -1.16556100 |
| H  | 0  | 2.07339300  | -1.95823600 | -1.00110600 |

B) **TS1 img= -1209.2836 cm<sup>-1</sup>**

E= -8828.089782 Ha

G= -8827.668208 Ha

|   |    |             |            |             |
|---|----|-------------|------------|-------------|
| C | -1 | 0.98897400  | 5.51820400 | 5.09336000  |
| H | -1 | 1.51000300  | 6.25360200 | 5.70717300  |
| C | -1 | 1.96621700  | 4.94808400 | 4.08445300  |
| O | -1 | 3.08092000  | 4.57552900 | 4.39358100  |
| H | -1 | 0.11147500  | 5.98004200 | 4.63697200  |
| H | -1 | 0.66079300  | 4.71270700 | 5.75470700  |
| N | -1 | 1.50374500  | 4.90159400 | 2.78358800  |
| H | -1 | 0.51243700  | 5.04908900 | 2.64707700  |
| C | -1 | 2.18306700  | 4.24488400 | 1.77991800  |
| H | -1 | 3.22459400  | 4.16973400 | 2.11164000  |
| C | 0  | 1.66533700  | 2.82306300 | 1.45445700  |
| H | 0  | 2.26956600  | 2.42360100 | 0.64020300  |
| H | 0  | 1.84865800  | 2.19774800 | 2.33106400  |
| C | 0  | 0.21520800  | 2.70688100 | 1.08609200  |
| N | 0  | -0.74337600 | 2.32024900 | 2.01151400  |
| H | 0  | -0.56051000 | 2.10849800 | 2.98399400  |
| C | 0  | -1.92501900 | 2.16048500 | 1.39154400  |
| H | 0  | -2.82908200 | 1.83987900 | 1.87848400  |
| N | 0  | -1.79313500 | 2.45627500 | 0.10621800  |
| C | 0  | -0.46611500 | 2.79751600 | -0.10311600 |
| H | 0  | -0.09270900 | 3.05281300 | -1.07980800 |
| C | -1 | 2.24146300  | 5.12219800 | 0.47557200  |
| O | -1 | 2.35760000  | 4.61729800 | -0.62831900 |
| N | -1 | 2.18694200  | 6.45895300 | 0.69674600  |
| H | -1 | 2.10003400  | 6.76846500 | 1.65128300  |
| C | -1 | 2.30113400  | 7.43300000 | -0.37293000 |
| H | -1 | 2.36741800  | 6.88318200 | -1.31017700 |
| H | -1 | 1.42583500  | 8.08754300 | -0.40189600 |
| H | -1 | 3.19951100  | 8.04571600 | -0.25491700 |
| C | -1 | 10.46345300 | 3.04453500 | -3.09244000 |
| H | -1 | 11.37932700 | 3.61640100 | -2.94397500 |
| C | -1 | 10.28346300 | 2.10088500 | -1.91777900 |

|   |    |             |             |             |
|---|----|-------------|-------------|-------------|
| O | -1 | 10.48790800 | 2.44535700  | -0.76996800 |
| H | -1 | 10.50228400 | 2.53541300  | -4.05749700 |
| H | -1 | 9.63001000  | 3.75157600  | -3.10126500 |
| N | -1 | 9.88745500  | 0.82380900  | -2.25019200 |
| H | -1 | 9.55665300  | 0.66491900  | -3.19097400 |
| C | -1 | 9.40889300  | -0.12953800 | -1.21342800 |
| H | -1 | 9.70592700  | 0.31899800  | -0.26193100 |
| C | 0  | 7.89100400  | -0.32020500 | -1.25957400 |
| H | 0  | 7.59921100  | -0.66346300 | -2.25694300 |
| H | 0  | 7.62897800  | -1.10879100 | -0.55283400 |
| C | 0  | 7.14959700  | 0.96846200  | -0.91231800 |
| H | 0  | 7.42105200  | 1.31258800  | 0.08896600  |
| H | 0  | 7.40691800  | 1.76421400  | -1.61454700 |
| S | 0  | 5.32781400  | 0.85126000  | -1.00709200 |
| C | 0  | 4.96671600  | -0.23985900 | 0.40534900  |
| H | 0  | 3.88157200  | -0.26536100 | 0.50954600  |
| H | 0  | 5.33285200  | -1.25239000 | 0.23564800  |
| H | 0  | 5.40259200  | 0.16554400  | 1.32024900  |
| C | -1 | 10.17585800 | -1.47628000 | -1.33510900 |
| O | -1 | 9.71514000  | -2.50199000 | -0.85999500 |
| N | -1 | 11.37603900 | -1.40473800 | -1.96138700 |
| H | -1 | 11.66724200 | -0.50019900 | -2.29559000 |
| C | -1 | 12.26618700 | -2.54535400 | -2.07251000 |
| H | -1 | 11.73930700 | -3.41282600 | -1.67877400 |
| H | -1 | 12.53507100 | -2.73059900 | -3.11589500 |
| H | -1 | 13.18106600 | -2.39181600 | -1.49263000 |
| C | -1 | -8.59789000 | 1.60843600  | -4.02272500 |
| H | -1 | -9.51715200 | 2.06591200  | -4.39208400 |
| C | -1 | -8.29957900 | 2.15993100  | -2.64510600 |
| O | -1 | -9.11532600 | 2.08324200  | -1.72975000 |
| H | -1 | -7.79500000 | 1.77417200  | -4.74263900 |
| H | -1 | -8.77858200 | 0.53567700  | -3.93000300 |
| N | -1 | -7.08152100 | 2.73124300  | -2.48155400 |
| H | -1 | -6.43918100 | 2.76177100  | -3.25804200 |
| C | -1 | -6.57518200 | 3.15200500  | -1.17858500 |
| H | -1 | -6.91484400 | 2.39958600  | -0.45890100 |

|   |    |             |             |             |
|---|----|-------------|-------------|-------------|
| C | 0  | -5.03741900 | 3.22390100  | -1.19943700 |
| H | 0  | -4.75329200 | 4.01075100  | -1.90153000 |
| H | 0  | -4.72068900 | 3.55673000  | -0.21233000 |
| S | 0  | -4.10161100 | 1.69416000  | -1.60103500 |
| H | 0  | -2.77037400 | 2.15056500  | -0.71716400 |
| C | -1 | -7.06454300 | 4.52396100  | -0.65526600 |
| O | -1 | -6.29175100 | 5.44094500  | -0.42564100 |
| N | -1 | -8.40237900 | 4.57202700  | -0.45495300 |
| H | -1 | -8.93735200 | 3.74072700  | -0.69237600 |
| C | -1 | -9.07660500 | 5.76484000  | 0.02195800  |
| H | -1 | -9.58450700 | 5.57506600  | 0.97199800  |
| H | -1 | -8.32543400 | 6.53890500  | 0.16944400  |
| H | -1 | -9.81471500 | 6.11487600  | -0.70551800 |
| C | -1 | -5.39277400 | 0.30104700  | 1.67352300  |
| H | -1 | -5.25645600 | 1.06019900  | 0.90104900  |
| C | -1 | -4.55140700 | -0.89432000 | 1.28256300  |
| O | -1 | -3.32761700 | -0.82736300 | 1.20235200  |
| H | -1 | -6.45552000 | 0.07323900  | 1.76691100  |
| H | -1 | -5.02435500 | 0.70222000  | 2.61915200  |
| N | -1 | -5.23211000 | -2.03036900 | 1.01512700  |
| H | -1 | -6.23320400 | -2.06493600 | 1.15053600  |
| C | -1 | -4.61057600 | -3.25412400 | 0.62137200  |
| H | -1 | -3.88398600 | -3.01928200 | -0.16187900 |
| C | 0  | -3.80494500 | -3.89611400 | 1.79780000  |
| H | 0  | -3.58686700 | -3.10736800 | 2.51878800  |
| H | 0  | -4.42146900 | -4.64105900 | 2.30888400  |
| C | 0  | -2.49057500 | -4.49829600 | 1.31829200  |
| H | 0  | -2.65316800 | -5.29413700 | 0.58952500  |
| H | 0  | -1.88399200 | -3.72164400 | 0.85073600  |
| S | 0  | -1.54167300 | -5.18268900 | 2.72311200  |
| C | 0  | -0.00049000 | -5.59935500 | 1.85146800  |
| H | 0  | -0.19121800 | -6.32537200 | 1.05917600  |
| H | 0  | 0.45476000  | -4.70325700 | 1.43346400  |
| H | 0  | 0.67877300  | -6.03710900 | 2.58329300  |
| C | -1 | -5.61389600 | -4.31379300 | 0.08759000  |
| O | -1 | -6.75130300 | -4.38231600 | 0.52680100  |

|    |    |             |             |             |
|----|----|-------------|-------------|-------------|
| N  | -1 | -5.09185000 | -5.14693000 | -0.84341200 |
| H  | -1 | -4.18433000 | -4.92301000 | -1.22332500 |
| C  | -1 | -5.84975100 | -6.24277700 | -1.42233700 |
| H  | -1 | -6.80084900 | -6.29967700 | -0.89625700 |
| H  | -1 | -6.04372500 | -6.07047700 | -2.48511300 |
| H  | -1 | -5.31598600 | -7.18923200 | -1.30664300 |
| Se | 0  | 0.41846500  | -0.67838500 | -0.20737000 |
| Se | 0  | 0.06548800  | -1.24080800 | 2.04043500  |
| C  | 0  | -0.49682000 | -2.13546100 | -1.08942800 |
| C  | 0  | -1.74118800 | -1.89337900 | -1.67359000 |
| C  | 0  | -2.40230500 | -2.92526000 | -2.33893800 |
| C  | 0  | -1.83003500 | -4.19447000 | -2.40737900 |
| C  | 0  | -0.58933900 | -4.43327500 | -1.81597700 |
| C  | 0  | 0.08489100  | -3.40381400 | -1.16502200 |
| C  | 0  | 1.54027400  | -2.42683300 | 2.46323100  |
| C  | 0  | 1.51482100  | -2.99831400 | 3.73844200  |
| C  | 0  | 2.52223800  | -3.88084800 | 4.11971600  |
| C  | 0  | 3.55484900  | -4.19665700 | 3.23668100  |
| C  | 0  | 3.57630500  | -3.61692000 | 1.96952800  |
| C  | 0  | 2.57174300  | -2.73246600 | 1.57937700  |
| H  | 0  | -2.19432100 | -0.91310400 | -1.59898500 |
| H  | 0  | -3.36947500 | -2.73869900 | -2.79082700 |
| H  | 0  | -2.35156100 | -4.99676400 | -2.91667000 |
| H  | 0  | -0.14479900 | -5.42034700 | -1.86267100 |
| H  | 0  | 1.04857200  | -3.58648100 | -0.70895500 |
| H  | 0  | 0.70838700  | -2.76741100 | 4.42483200  |
| H  | 0  | 2.49466500  | -4.32577200 | 5.10776500  |
| H  | 0  | 4.33487400  | -4.88702900 | 3.53464800  |
| H  | 0  | 4.37558000  | -3.85163100 | 1.27580400  |
| H  | 0  | 2.58916800  | -2.29113500 | 0.59168600  |

C) **post-TCI**

E= -8828.102212 Ha

G= -8827.675945 Ha

|   |    |            |            |            |
|---|----|------------|------------|------------|
| C | -1 | 2.11889300 | 5.47859000 | 5.10946700 |
| H | -1 | 2.69849300 | 6.21437000 | 5.66780100 |
| C | -1 | 3.03443500 | 4.79257100 | 4.11494000 |

|   |    |             |             |             |
|---|----|-------------|-------------|-------------|
| O | -1 | 4.13205300  | 4.37033500  | 4.42133600  |
| H | -1 | 1.25968200  | 5.96677400  | 4.64576300  |
| H | -1 | 1.75941000  | 4.73397700  | 5.82377000  |
| N | -1 | 2.53759100  | 4.70034600  | 2.82928500  |
| H | -1 | 1.55389300  | 4.90065600  | 2.70567000  |
| C | -1 | 3.15057500  | 3.94687800  | 1.85132200  |
| H | -1 | 4.19386200  | 3.82659800  | 2.16452000  |
| C | 0  | 2.58687100  | 2.53049700  | 1.63753100  |
| H | 0  | 3.24806600  | 2.00425900  | 0.94513000  |
| H | 0  | 2.63970300  | 2.00536300  | 2.59258200  |
| C | 0  | 1.18678200  | 2.44597600  | 1.12022100  |
| N | 0  | 0.23783700  | 1.62921300  | 1.71990300  |
| H | 0  | 0.41013900  | 1.04099100  | 2.52647000  |
| C | 0  | -0.88219700 | 1.59667200  | 0.99849800  |
| H | 0  | -1.74968900 | 0.98919600  | 1.21405800  |
| N | 0  | -0.69824900 | 2.41764900  | -0.03425800 |
| C | 0  | 0.57571300  | 2.95275900  | 0.00770600  |
| H | 0  | 0.93793800  | 3.61443800  | -0.75568400 |
| C | -1 | 3.22949500  | 4.74278000  | 0.49697100  |
| O | -1 | 3.28709100  | 4.16942000  | -0.57768600 |
| N | -1 | 3.26100000  | 6.09083000  | 0.64056100  |
| H | -1 | 3.21681900  | 6.45917300  | 1.57697300  |
| C | -1 | 3.40689900  | 6.99323800  | -0.48655200 |
| H | -1 | 3.41645100  | 6.38769900  | -1.39118200 |
| H | -1 | 2.57219000  | 7.69774500  | -0.53500500 |
| H | -1 | 4.34324300  | 7.55517200  | -0.42397000 |
| C | -1 | 11.21927000 | 1.96185200  | -3.11900900 |
| H | -1 | 12.17137400 | 2.48374400  | -3.02401900 |
| C | -1 | 11.01215600 | 1.09979700  | -1.88748500 |
| O | -1 | 11.26566500 | 1.49606600  | -0.76648400 |
| H | -1 | 11.20318500 | 1.39696600  | -4.05319000 |
| H | -1 | 10.42999600 | 2.71724300  | -3.15133800 |
| N | -1 | 10.53184300 | -0.16749400 | -2.13595700 |
| H | -1 | 10.16845900 | -0.35905300 | -3.05843400 |
| C | -1 | 10.02245200 | -1.02804500 | -1.03549200 |
| H | -1 | 10.37002200 | -0.54600300 | -0.11784900 |



|   |    |             |             |             |
|---|----|-------------|-------------|-------------|
| C | 0  | 8.49623700  | -1.12343500 | -1.04046400 |
| H | 0  | 8.16206200  | -1.59492400 | -1.96960400 |
| H | 0  | 8.19864100  | -1.77524900 | -0.21784100 |
| C | 0  | 7.84825800  | 0.25231500  | -0.89592600 |
| H | 0  | 8.21771000  | 0.76666000  | -0.00510800 |
| H | 0  | 8.08265200  | 0.87978600  | -1.75776100 |
| S | 0  | 6.02307400  | 0.21867300  | -0.81810600 |
| C | 0  | 5.78471300  | -0.42006600 | 0.86819400  |
| H | 0  | 4.71046700  | -0.49106400 | 1.03322300  |
| H | 0  | 6.22412700  | -1.41166200 | 0.98068500  |
| H | 0  | 6.21707400  | 0.26429000  | 1.60013500  |
| C | -1 | 10.70382300 | -2.42476100 | -1.09377400 |
| O | -1 | 10.19408700 | -3.39130600 | -0.54988400 |
| N | -1 | 11.89005500 | -2.46323900 | -1.74905400 |
| H | -1 | 12.22677800 | -1.59895800 | -2.14188800 |
| C | -1 | 12.70676000 | -3.66102900 | -1.81228500 |
| H | -1 | 12.13856900 | -4.47045600 | -1.35716900 |
| H | -1 | 12.93779700 | -3.92184000 | -2.84855900 |
| H | -1 | 13.64345200 | -3.53126100 | -1.26218800 |
| C | -1 | -7.91127500 | 1.65223800  | -3.55379000 |
| H | -1 | -8.81024700 | 2.14362500  | -3.92948300 |
| C | -1 | -7.54585800 | 2.26206600  | -2.21756100 |
| O | -1 | -8.34161800 | 2.28834100  | -1.28198700 |
| H | -1 | -7.11812000 | 1.72675400  | -4.29926100 |
| H | -1 | -8.15392100 | 0.59971000  | -3.39451300 |
| N | -1 | -6.29206900 | 2.76631800  | -2.11412700 |
| H | -1 | -5.66847300 | 2.71198300  | -2.90450400 |
| C | -1 | -5.72828300 | 3.22845500  | -0.84866500 |
| H | -1 | -6.09521700 | 2.54022500  | -0.07985800 |
| C | 0  | -4.17437800 | 3.12446100  | -0.86804600 |
| H | 0  | -3.76253200 | 4.13225200  | -0.88919800 |
| H | 0  | -3.82031800 | 2.65027900  | 0.04515300  |
| S | 0  | -3.36700900 | 2.31025400  | -2.30290900 |
| H | 0  | -1.38431100 | 2.57225600  | -0.77332500 |
| C | -1 | -6.12122800 | 4.65540000  | -0.39642500 |
| O | -1 | -5.28906400 | 5.53474900  | -0.23789800 |

|    |    |             |             |             |
|----|----|-------------|-------------|-------------|
| N  | -1 | -7.44829800 | 4.79728400  | -0.17087700 |
| H  | -1 | -8.03816900 | 3.98830100  | -0.34757200 |
| C  | -1 | -8.03725200 | 6.05467100  | 0.24976600  |
| H  | -1 | -8.53173900 | 5.95118100  | 1.21998700  |
| H  | -1 | -7.23733700 | 6.78813800  | 0.33547100  |
| H  | -1 | -8.77089300 | 6.40735900  | -0.48094100 |
| C  | -1 | -4.64935100 | 0.47763300  | 2.13918100  |
| H  | -1 | -4.48671100 | 1.18151100  | 1.32064800  |
| C  | -1 | -3.89152300 | -0.78760900 | 1.80060900  |
| O  | -1 | -2.66826900 | -0.80099200 | 1.69078200  |
| H  | -1 | -5.72114500 | 0.32146800  | 2.26849000  |
| H  | -1 | -4.23378700 | 0.90874200  | 3.05145500  |
| N  | -1 | -4.64608600 | -1.89308700 | 1.61494400  |
| H  | -1 | -5.64358600 | -1.85810600 | 1.77389500  |
| C  | -1 | -4.10906500 | -3.17331100 | 1.28040200  |
| H  | -1 | -3.38978300 | -3.02879200 | 0.46936800  |
| C  | 0  | -3.34905100 | -3.77248200 | 2.49679700  |
| H  | 0  | -2.66440000 | -2.99769700 | 2.84473800  |
| H  | 0  | -4.06605100 | -3.96523000 | 3.29981500  |
| C  | 0  | -2.55760300 | -5.03499800 | 2.16894500  |
| H  | 0  | -3.20456400 | -5.90960300 | 2.09699900  |
| H  | 0  | -2.02951800 | -4.92325100 | 1.21851200  |
| S  | 0  | -1.31435500 | -5.34536400 | 3.47474100  |
| C  | 0  | -0.53100200 | -6.82862600 | 2.77167000  |
| H  | 0  | -1.25559200 | -7.63867700 | 2.67241300  |
| H  | 0  | -0.09233000 | -6.60310500 | 1.79801100  |
| H  | 0  | 0.25905400  | -7.13778400 | 3.45705700  |
| C  | -1 | -5.18782600 | -4.19789500 | 0.83150800  |
| O  | -1 | -6.31589400 | -4.17095900 | 1.29814800  |
| N  | -1 | -4.74019400 | -5.11417100 | -0.06011000 |
| H  | -1 | -3.83085600 | -4.96757500 | -0.47174100 |
| C  | -1 | -5.57721100 | -6.19176600 | -0.55761500 |
| H  | -1 | -6.51648500 | -6.15987800 | -0.00868300 |
| H  | -1 | -5.78691500 | -6.06898200 | -1.62414000 |
| H  | -1 | -5.09867100 | -7.16124700 | -0.39805300 |
| Se | 0  | -2.91277600 | 0.11158900  | -1.83705400 |

|    |   |             |             |             |
|----|---|-------------|-------------|-------------|
| Se | 0 | -1.56176100 | -2.83468700 | -1.60490800 |
| C  | 0 | -4.64469500 | -0.73983700 | -2.01918700 |
| C  | 0 | -5.69234100 | -0.40594100 | -1.16099400 |
| C  | 0 | -6.88994900 | -1.11407400 | -1.21371300 |
| C  | 0 | -7.03821800 | -2.17198300 | -2.10896700 |
| C  | 0 | -5.99408800 | -2.49891400 | -2.97393300 |
| C  | 0 | -4.80162400 | -1.77793700 | -2.94088200 |
| C  | 0 | -0.16711100 | -2.09070700 | -0.50541700 |
| C  | 0 | 0.03570700  | -2.53888400 | 0.80913200  |
| C  | 0 | 1.05060000  | -2.00486200 | 1.59943700  |
| C  | 0 | 1.89226200  | -1.01424800 | 1.09602500  |
| C  | 0 | 1.70017200  | -0.55579100 | -0.20703800 |
| C  | 0 | 0.67861800  | -1.08077100 | -0.99621300 |
| H  | 0 | -5.57320100 | 0.38801000  | -0.44060300 |
| H  | 0 | -7.69810600 | -0.84450500 | -0.54436600 |
| H  | 0 | -7.96210900 | -2.73729900 | -2.13455200 |
| H  | 0 | -6.10568900 | -3.31543200 | -3.67770900 |
| H  | 0 | -3.99245300 | -2.03387200 | -3.61250300 |
| H  | 0 | -0.60297300 | -3.30965600 | 1.21873700  |
| H  | 0 | 1.18200100  | -2.36831400 | 2.61298200  |
| H  | 0 | 2.67248300  | -0.59235800 | 1.71701700  |
| H  | 0 | 2.34060800  | 0.22185100  | -0.60834900 |
| H  | 0 | 0.53971500  | -0.71278900 | -2.00607700 |

D) **TS2 = -967.796 cm<sup>-1</sup>**

E= -8828.077273 Ha

G= -8827.658490 Ha

|   |    |            |            |            |
|---|----|------------|------------|------------|
| C | -1 | 1.02980000 | 5.68840000 | 4.89300000 |
| H | -1 | 1.55350000 | 6.45020000 | 5.47130000 |
| C | -1 | 2.00820000 | 5.05860000 | 3.92140000 |
| O | -1 | 3.11770000 | 4.69320000 | 4.25670000 |
| H | -1 | 0.15920000 | 6.13340000 | 4.40750000 |
| H | -1 | 0.69060000 | 4.92110000 | 5.59290000 |
| N | -1 | 1.55340000 | 4.94870000 | 2.62160000 |
| H | -1 | 0.70710000 | 5.36990000 | 2.38120000 |

|   |    |             |             |             |
|---|----|-------------|-------------|-------------|
| C | -1 | 2.23300000  | 4.23540000  | 1.65760000  |
| H | -1 | 3.27190000  | 4.16850000  | 1.99990000  |
| C | 0  | 1.87483900  | 2.74326200  | 1.47712700  |
| H | 0  | 2.71477100  | 2.27755500  | 0.95881600  |
| H | 0  | 1.86131600  | 2.31625000  | 2.48535700  |
| C | 0  | 0.65165300  | 2.31431100  | 0.74940900  |
| N | 0  | -0.65612300 | 2.51510200  | 1.16330300  |
| H | 0  | -0.94767400 | 3.08506100  | 1.94663200  |
| C | 0  | -1.48029600 | 1.80555700  | 0.35941500  |
| H | 0  | -2.54880900 | 1.77066500  | 0.48115300  |
| N | 0  | -0.77155500 | 1.17108200  | -0.56506200 |
| C | 0  | 0.55551100  | 1.47634200  | -0.32707700 |
| H | 0  | 1.34980100  | 1.04676000  | -0.91493800 |
| C | -1 | 2.30740000  | 5.04330000  | 0.31020000  |
| O | -1 | 2.42570000  | 4.48100000  | -0.76530000 |
| N | -1 | 2.26300000  | 6.39010000  | 0.46160000  |
| H | -1 | 2.17300000  | 6.74940000  | 1.39820000  |
| C | -1 | 2.39230000  | 7.30650000  | -0.65630000 |
| H | -1 | 2.45960000  | 6.70830000  | -1.56340000 |
| H | -1 | 1.52300000  | 7.96600000  | -0.72490000 |
| H | -1 | 3.29530000  | 7.91690000  | -0.56420000 |
| C | -1 | 10.53260000 | 2.71460000  | -3.09120000 |
| H | -1 | 11.45250000 | 3.28560000  | -2.96640000 |
| C | -1 | 10.33710000 | 1.83460000  | -1.87050000 |
| O | -1 | 10.53750000 | 2.23630000  | -0.74070000 |
| H | -1 | 10.57290000 | 2.15580000  | -4.02830000 |
| H | -1 | 9.70540000  | 3.42720000  | -3.14210000 |
| N | -1 | 9.93200000  | 0.54540000  | -2.13890000 |
| H | -1 | 9.60560000  | 0.34080000  | -3.07240000 |
| C | -1 | 9.43870000  | -0.34880000 | -1.05800000 |
| H | -1 | 9.73390000  | 0.14550000  | -0.12840000 |
| C | 0  | 7.91728500  | -0.52169700 | -1.11519000 |
| H | 0  | 7.64165700  | -0.95463100 | -2.08177400 |
| H | 0  | 7.62383900  | -1.23347400 | -0.34226000 |
| C | 0  | 7.19284700  | 0.80944200  | -0.91800100 |
| H | 0  | 7.41746700  | 1.23406700  | 0.06367700  |

|   |    |             |             |             |
|---|----|-------------|-------------|-------------|
| H | 0  | 7.51329400  | 1.53363100  | -1.66964700 |
| S | 0  | 5.37672200  | 0.73738400  | -1.11506700 |
| C | 0  | 4.87622800  | -0.10946200 | 0.41655800  |
| H | 0  | 3.78686300  | -0.15471500 | 0.40795300  |
| H | 0  | 5.27164200  | -1.12433800 | 0.45760100  |
| H | 0  | 5.20481000  | 0.45517600  | 1.29084000  |
| C | -1 | 10.19470000 | -1.70660000 | -1.10390000 |
| O | -1 | 9.72200000  | -2.70240000 | -0.57980000 |
| N | -1 | 11.39920000 | -1.67770000 | -1.72540000 |
| H | -1 | 11.70040000 | -0.79410000 | -2.10410000 |
| C | -1 | 12.28010000 | -2.83000000 | -1.77150000 |
| H | -1 | 11.74320000 | -3.67140000 | -1.33690000 |
| H | -1 | 12.55370000 | -3.07130000 | -2.80220000 |
| H | -1 | 13.19260000 | -2.65430000 | -1.19440000 |
| C | -1 | -8.53450000 | 1.39260000  | -4.07180000 |
| H | -1 | -9.44740000 | 1.83810000  | -4.47040000 |
| C | -1 | -8.23980000 | 2.01210000  | -2.72260000 |
| O | -1 | -9.06190000 | 1.98990000  | -1.80990000 |
| H | -1 | -7.72580000 | 1.51410000  | -4.79400000 |
| H | -1 | -8.72510000 | 0.32770000  | -3.92490000 |
| N | -1 | -7.01790000 | 2.58110000  | -2.58090000 |
| H | -1 | -6.37050000 | 2.56570000  | -3.35350000 |
| C | -1 | -6.51590000 | 3.06490000  | -1.29660000 |
| H | -1 | -6.86670000 | 2.35250000  | -0.54320000 |
| C | 0  | -4.96280300 | 3.07094000  | -1.32737800 |
| H | 0  | -4.62163500 | 4.08789400  | -1.52290100 |
| H | 0  | -4.55801300 | 2.77345000  | -0.36226000 |
| S | 0  | -4.13503800 | 2.11171500  | -2.65058600 |
| H | 0  | -0.95944200 | -0.16277800 | -1.04614900 |
| C | -1 | -6.99660000 | 4.46580000  | -0.85030000 |
| O | -1 | -6.21710000 | 5.38660000  | -0.66240000 |
| N | -1 | -8.33510000 | 4.53530000  | -0.66100000 |
| H | -1 | -8.87580000 | 3.69730000  | -0.85850000 |
| C | -1 | -9.00180000 | 5.75680000  | -0.25080000 |
| H | -1 | -9.51720000 | 5.62070000  | 0.70440000  |
| H | -1 | -8.24480000 | 6.53110000  | -0.13860000 |

|    |    |             |             |             |
|----|----|-------------|-------------|-------------|
| H  | -1 | -9.73230000 | 6.07490000  | -1.00030000 |
| C  | -1 | -5.37620000 | 0.35550000  | 1.70630000  |
| H  | -1 | -5.22800000 | 1.07140000  | 0.89500000  |
| C  | -1 | -4.54300000 | -0.86580000 | 1.38120000  |
| O  | -1 | -3.31790000 | -0.81370000 | 1.30760000  |
| H  | -1 | -6.44130000 | 0.14130000  | 1.80350000  |
| H  | -1 | -5.01000000 | 0.80150000  | 2.63150000  |
| N  | -1 | -5.23170000 | -2.00860000 | 1.16970000  |
| H  | -1 | -6.23390000 | -2.02770000 | 1.30020000  |
| C  | -1 | -4.61830000 | -3.25700000 | 0.84400000  |
| H  | -1 | -3.88530000 | -3.06780000 | 0.05430000  |
| C  | 0  | -3.81447100 | -3.84070500 | 2.05200200  |
| H  | 0  | -3.62706300 | -3.02406300 | 2.75001700  |
| H  | 0  | -4.41542700 | -4.58643000 | 2.57966100  |
| C  | 0  | -2.47927000 | -4.42193900 | 1.60416900  |
| H  | 0  | -2.61611900 | -5.27206900 | 0.93239000  |
| H  | 0  | -1.90546800 | -3.65608600 | 1.07717300  |
| S  | 0  | -1.49275600 | -4.96573400 | 3.04425800  |
| C  | 0  | 0.05534000  | -5.36927900 | 2.17728800  |
| H  | 0  | -0.09073800 | -6.20944700 | 1.49589100  |
| H  | 0  | 0.41412600  | -4.50222500 | 1.62415500  |
| H  | 0  | 0.79286300  | -5.64441900 | 2.93199900  |
| C  | -1 | -5.62780000 | -4.33370000 | 0.35910000  |
| O  | -1 | -6.76850000 | -4.36970000 | 0.79350000  |
| N  | -1 | -5.10710000 | -5.21900000 | -0.52410000 |
| H  | -1 | -4.19570000 | -5.02160000 | -0.90890000 |
| C  | -1 | -5.87120000 | -6.33610000 | -1.05080000 |
| H  | -1 | -6.82600000 | -6.35780000 | -0.52860000 |
| H  | -1 | -6.05710000 | -6.21760000 | -2.12220000 |
| H  | -1 | -5.34640000 | -7.27990000 | -0.88260000 |
| Se | 0  | -3.85036100 | 0.04755900  | -1.89266500 |
| Se | 0  | -0.77416900 | -1.78584600 | -1.38076500 |
| C  | 0  | -5.49913100 | -0.92474900 | -2.16467400 |
| C  | 0  | -6.67028900 | -0.58526300 | -1.48556100 |
| C  | 0  | -7.78387000 | -1.41444100 | -1.56582400 |
| C  | 0  | -7.72136000 | -2.60397700 | -2.29283000 |

|   |   |             |             |             |
|---|---|-------------|-------------|-------------|
| C | 0 | -6.54872700 | -2.94806200 | -2.96161600 |
| C | 0 | -5.43900200 | -2.10397300 | -2.91093700 |
| C | 0 | 0.49339000  | -2.02479500 | 0.05690900  |
| C | 0 | 0.22335800  | -1.50602100 | 1.32953300  |
| C | 0 | 1.14853400  | -1.66100800 | 2.36036200  |
| C | 0 | 2.34381000  | -2.34485500 | 2.14122300  |
| C | 0 | 2.60914000  | -2.87306100 | 0.87871900  |
| C | 0 | 1.69375300  | -2.71010600 | -0.15984500 |
| H | 0 | -6.70693800 | 0.30261200  | -0.87364400 |
| H | 0 | -8.69202800 | -1.13917800 | -1.04290400 |
| H | 0 | -8.58180500 | -3.26099400 | -2.33331400 |
| H | 0 | -6.49444300 | -3.87149900 | -3.52600900 |
| H | 0 | -4.52871800 | -2.36885800 | -3.43473500 |
| H | 0 | -0.70842700 | -0.98726300 | 1.51500000  |
| H | 0 | 0.92842200  | -1.25037200 | 3.33940800  |
| H | 0 | 3.06014200  | -2.46555500 | 2.94518000  |
| H | 0 | 3.53582500  | -3.40489100 | 0.69558000  |
| H | 0 | 1.91611700  | -3.10996400 | -1.14202600 |

D) **PC**

E= -8828.088615 Ha

G= -8827.665580 Ha

|   |    |            |            |            |
|---|----|------------|------------|------------|
| C | -1 | 2.00304700 | 5.40221500 | 4.98874000 |
| H | -1 | 2.58057500 | 6.14799300 | 5.53584100 |
| C | -1 | 2.92059000 | 4.70356100 | 4.00490500 |
| O | -1 | 4.01930300 | 4.28902700 | 4.31783600 |
| H | -1 | 1.14259700 | 5.88093500 | 4.51753800 |
| H | -1 | 1.64546900 | 4.66761900 | 5.71428600 |
| N | -1 | 2.42423300 | 4.59040800 | 2.72075200 |
| H | -1 | 1.43998100 | 4.78610800 | 2.59398900 |
| C | -1 | 3.03939000 | 3.82379900 | 1.75439000 |
| H | -1 | 4.08290300 | 3.71105100 | 2.06967100 |
| C | 0  | 2.44173500 | 2.42036300 | 1.56070000 |
| H | 0  | 2.98131700 | 1.91827100 | 0.75386800 |
| H | 0  | 2.62621300 | 1.84563400 | 2.47222700 |
| C | 0  | 0.97340400 | 2.45638200 | 1.28621000 |

|   |    |             |             |             |
|---|----|-------------|-------------|-------------|
| N | 0  | 0.14937000  | 1.37190200  | 1.50623900  |
| H | 0  | 0.45068200  | 0.45332600  | 1.80863000  |
| C | 0  | -1.12866800 | 1.74175200  | 1.21690000  |
| H | 0  | -1.95176600 | 1.05555800  | 1.32007200  |
| N | 0  | -1.18250900 | 3.00202900  | 0.82949900  |
| C | 0  | 0.12567700  | 3.45285000  | 0.86129400  |
| H | 0  | 0.36847000  | 4.46481400  | 0.57926300  |
| C | -1 | 3.11637200  | 4.59908600  | 0.38814500  |
| O | -1 | 3.17563200  | 4.00953700  | -0.67763400 |
| N | -1 | 3.14416600  | 5.94924300  | 0.51113600  |
| H | -1 | 3.09886900  | 6.33171600  | 1.44181100  |
| C | -1 | 3.28782300  | 6.83473000  | -0.62960600 |
| H | -1 | 3.29915100  | 6.21547800  | -1.52488400 |
| H | -1 | 2.45122300  | 7.53615600  | -0.68890200 |
| H | -1 | 4.22263800  | 7.40008400  | -0.57550300 |
| C | -1 | 11.11416200 | 1.78487900  | -3.18406300 |
| H | -1 | 12.06483900 | 2.31073300  | -3.09694400 |
| C | -1 | 10.90919800 | 0.94116600  | -1.93954300 |
| O | -1 | 11.16145500 | 1.35518800  | -0.82469500 |
| H | -1 | 11.09974700 | 1.20575700  | -4.10951300 |
| H | -1 | 10.32285700 | 2.53755400  | -3.22800900 |
| N | -1 | 10.43225600 | -0.33086500 | -2.16858400 |
| H | -1 | 10.06963600 | -0.53767900 | -3.08818600 |
| C | -1 | 9.92520900  | -1.17646900 | -1.05547500 |
| H | -1 | 10.27120500 | -0.67898500 | -0.14514700 |
| C | 0  | 8.39612500  | -1.23364000 | -1.01604200 |
| H | 0  | 8.00760700  | -1.75942300 | -1.89283800 |
| H | 0  | 8.10663100  | -1.80515600 | -0.13241300 |
| C | 0  | 7.82371600  | 0.18529100  | -0.95279600 |
| H | 0  | 8.36776400  | 0.78641300  | -0.22042800 |
| H | 0  | 7.92623800  | 0.68147700  | -1.91907900 |
| S | 0  | 6.05080900  | 0.30868900  | -0.53806800 |
| C | 0  | 6.12307600  | -0.01937400 | 1.25257600  |
| H | 0  | 5.14684300  | 0.22813000  | 1.66977200  |
| H | 0  | 6.34927200  | -1.06573000 | 1.45990200  |
| H | 0  | 6.87595600  | 0.62218100  | 1.71357700  |



|   |    |             |             |             |
|---|----|-------------|-------------|-------------|
| C | -1 | 10.61032300 | -2.57165500 | -1.09188100 |
| O | -1 | 10.10300900 | -3.53120400 | -0.53369600 |
| N | -1 | 11.79665200 | -2.61696700 | -1.74669500 |
| H | -1 | 12.13113400 | -1.75786300 | -2.15258000 |
| C | -1 | 12.61663400 | -3.81335600 | -1.79148200 |
| H | -1 | 12.05056000 | -4.61727300 | -1.32412600 |
| H | -1 | 12.84853400 | -4.08933100 | -2.82362700 |
| H | -1 | 13.55288600 | -3.67267400 | -1.24332300 |
| C | -1 | -8.01540800 | 1.41695300  | -3.61622900 |
| H | -1 | -8.91564500 | 1.90011600  | -3.99948000 |
| C | -1 | -7.65185700 | 2.04812200  | -2.28942900 |
| O | -1 | -8.44782000 | 2.08649700  | -1.35444900 |
| H | -1 | -7.22234300 | 1.48222400  | -4.36266200 |
| H | -1 | -8.25523500 | 0.36632900  | -3.44092800 |
| N | -1 | -6.39923900 | 2.55688700  | -2.19350600 |
| H | -1 | -5.77560600 | 2.49266700  | -2.98297400 |
| C | -1 | -5.83740100 | 3.04062000  | -0.93421800 |
| H | -1 | -6.20217200 | 2.36257300  | -0.15620500 |
| C | 0  | -4.28291400 | 2.98699400  | -0.99695300 |
| H | 0  | -3.91326300 | 4.00394800  | -1.11153400 |
| H | 0  | -3.86717900 | 2.60110700  | -0.07048100 |
| S | 0  | -3.49856500 | 2.09621500  | -2.39572900 |
| H | 0  | -1.87050400 | -2.35268900 | -0.21963800 |
| C | -1 | -6.23408100 | 4.47303600  | -0.50579100 |
| O | -1 | -5.40416900 | 5.35661400  | -0.35935500 |
| N | -1 | -7.56144900 | 4.61451600  | -0.28166400 |
| H | -1 | -8.14910600 | 3.80133900  | -0.44606100 |
| C | -1 | -8.15386400 | 5.87658200  | 0.11966100  |
| H | -1 | -8.64821900 | 5.78657900  | 1.09129300  |
| H | -1 | -7.35594600 | 6.61343300  | 0.19425000  |
| H | -1 | -8.88834200 | 6.21609000  | -0.61642800 |
| C | -1 | -4.75118600 | 0.33866200  | 2.09506400  |
| H | -1 | -4.59011900 | 1.02933900  | 1.26456700  |
| C | -1 | -3.99012600 | -0.92977900 | 1.77403400  |
| O | -1 | -2.76652300 | -0.94187900 | 1.66623800  |
| H | -1 | -5.82258900 | 0.18114000  | 2.22594400  |

|    |    |             |             |             |
|----|----|-------------|-------------|-------------|
| H  | -1 | -4.33693600 | 0.78432000  | 3.00001000  |
| N  | -1 | -4.74126300 | -2.04020300 | 1.60668600  |
| H  | -1 | -5.73906800 | -2.00550600 | 1.76468100  |
| C  | -1 | -4.20104600 | -3.32460000 | 1.29169900  |
| H  | -1 | -3.48204700 | -3.18930300 | 0.47840900  |
| C  | 0  | -3.41980200 | -3.90224800 | 2.50949700  |
| H  | 0  | -2.92588100 | -3.05977000 | 2.99400700  |
| H  | 0  | -4.13082600 | -4.32159600 | 3.22714300  |
| C  | 0  | -2.35991100 | -4.92391600 | 2.11414200  |
| H  | 0  | -2.79978400 | -5.86715200 | 1.78923400  |
| H  | 0  | -1.75169400 | -4.53010900 | 1.29748300  |
| S  | 0  | -1.22972800 | -5.24864400 | 3.51933900  |
| C  | 0  | 0.17047200  | -5.95511700 | 2.59766700  |
| H  | 0  | -0.12963900 | -6.86040500 | 2.06747400  |
| H  | 0  | 0.56530800  | -5.22285500 | 1.89093400  |
| H  | 0  | 0.94486000  | -6.20714900 | 3.32331700  |
| C  | -1 | -5.27679600 | -4.35820800 | 0.85814700  |
| O  | -1 | -6.40507400 | -4.32711800 | 1.32417100  |
| N  | -1 | -4.82659100 | -5.28675800 | -0.01926800 |
| H  | -1 | -3.91760000 | -5.14398400 | -0.43301600 |
| C  | -1 | -5.66062900 | -6.37405800 | -0.50039000 |
| H  | -1 | -6.60007100 | -6.33633500 | 0.04788500  |
| H  | -1 | -5.87049800 | -6.26813900 | -1.56868800 |
| H  | -1 | -5.17949700 | -7.33969500 | -0.32599200 |
| Se | 0  | -2.85881200 | 0.12291000  | -1.62788900 |
| Se | 0  | -0.73848200 | -2.86767200 | -0.99876400 |
| C  | 0  | -4.43121900 | -0.99456100 | -1.78656400 |
| C  | 0  | -5.65676900 | -0.60238100 | -1.24773200 |
| C  | 0  | -6.75025800 | -1.46039600 | -1.31522300 |
| C  | 0  | -6.61494200 | -2.72500300 | -1.88826700 |
| C  | 0  | -5.38512200 | -3.12084200 | -2.41058000 |
| C  | 0  | -4.29281200 | -2.25485900 | -2.37268900 |
| C  | 0  | 0.59032300  | -2.25178200 | 0.25556900  |
| C  | 0  | 0.35371600  | -2.25408400 | 1.63314500  |
| C  | 0  | 1.34694500  | -1.80882800 | 2.50476800  |
| C  | 0  | 2.58069400  | -1.38063500 | 2.01241300  |

|   |   |             |             |             |
|---|---|-------------|-------------|-------------|
| C | 0 | 2.81433000  | -1.39676200 | 0.63894600  |
| C | 0 | 1.82211800  | -1.82285800 | -0.24072600 |
| H | 0 | -5.75695800 | 0.35507000  | -0.76056100 |
| H | 0 | -7.70020800 | -1.14328300 | -0.90107000 |
| H | 0 | -7.46087700 | -3.40091900 | -1.92079400 |
| H | 0 | -5.27397500 | -4.10314300 | -2.85370100 |
| H | 0 | -3.34133600 | -2.55883000 | -2.79189400 |
| H | 0 | -0.59393000 | -2.59344600 | 2.02664800  |
| H | 0 | 1.15380500  | -1.80599700 | 3.57134200  |
| H | 0 | 3.35161300  | -1.03670600 | 2.69118900  |
| H | 0 | 3.76706800  | -1.07311300 | 0.24041500  |
| H | 0 | 2.00466700  | -1.81174100 | -1.30864400 |

**Table S12:** Cluster 1 at 88ns; Optimized coordinates at SMD(**diethylether**)-B3LYP/6-311G(d,p),ccPVTZ. Constrained atoms (*first column = -1*):

1,2,3,4,5,6,7,8,9,10,22,23,24,25,26,27,28,29,30,31,32,33,34,35,36,37,38,39,51,52,53,54,55,56,57,58,59,60,61,62,63,64,65,66,67,68,74,75,76,77,78,79,80,  
81,82,83,84,85,86,87,88,89,90,91,103,104,105,106,107,108,109,110

A) **RC**

E= -8828.094382 Ha

G= -8827.672764 Ha

|   |    |            |            |            |
|---|----|------------|------------|------------|
| C | -1 | 1.08046300 | 5.81142200 | 4.88862200 |
| H | -1 | 1.60840900 | 6.57903500 | 5.45527200 |
| C | -1 | 2.05532500 | 5.16118300 | 3.92697500 |
| O | -1 | 3.16269100 | 4.79467400 | 4.26804800 |
| H | -1 | 0.21242900 | 6.25378900 | 4.39626200 |
| H | -1 | 0.73679300 | 5.05685200 | 5.60025700 |
| N | -1 | 1.59993100 | 5.03385600 | 2.62903300 |
| H | -1 | 0.61167400 | 5.18573200 | 2.47610900 |
| C | -1 | 2.27559400 | 4.30174800 | 1.67621200 |
| H | -1 | 3.31394800 | 4.23449300 | 2.01960700 |

|   |    |             |             |             |
|---|----|-------------|-------------|-------------|
| C | 0  | 1.79509200  | 2.85884400  | 1.44679100  |
| H | 0  | 2.43302500  | 2.42710200  | 0.67261500  |
| H | 0  | 1.97458500  | 2.29686500  | 2.36711900  |
| C | 0  | 0.35816500  | 2.72223800  | 1.06010900  |
| N | 0  | -0.49694800 | 1.87938200  | 1.74408800  |
| H | 0  | -0.23327700 | 1.26892400  | 2.50430400  |
| C | 0  | -1.71200200 | 1.90887700  | 1.13882300  |
| H | 0  | -2.51151600 | 1.24200800  | 1.42006500  |
| N | 0  | -1.69776800 | 2.73422400  | 0.10891100  |
| C | 0  | -0.41517300 | 3.24852600  | 0.04967600  |
| H | 0  | -0.11264700 | 3.93744000  | -0.72131000 |
| C | -1 | 2.35436200  | 5.08856700  | 0.31652200  |
| O | -1 | 2.46973800  | 4.50905600  | -0.75018500 |
| N | -1 | 2.31784800  | 6.43778500  | 0.44712200  |
| H | -1 | 2.22976400  | 6.81191700  | 1.37812100  |
| C | -1 | 2.45238800  | 7.33606700  | -0.68469000 |
| H | -1 | 2.51627000  | 6.72364700  | -1.58245600 |
| H | -1 | 1.58680800  | 7.99937100  | -0.76351700 |
| H | -1 | 3.35879700  | 7.94269500  | -0.60189000 |
| C | -1 | 10.56648000 | 2.66099100  | -3.04752000 |
| H | -1 | 11.48961500 | 3.22866600  | -2.93147700 |
| C | -1 | 10.36595600 | 1.80100900  | -1.81345400 |
| O | -1 | 10.56856400 | 2.21892700  | -0.68996600 |
| H | -1 | 10.60366500 | 2.08768500  | -3.97595200 |
| H | -1 | 9.74338900  | 3.37743700  | -3.10948700 |
| N | -1 | 9.95354200  | 0.51011800  | -2.06216700 |
| H | -1 | 9.62604400  | 0.29305900  | -2.99238900 |
| C | -1 | 9.45518200  | -0.36450700 | -0.96706700 |
| H | -1 | 9.75300700  | 0.14261800  | -0.04575900 |
| C | 0  | 7.94007700  | -0.56921100 | -1.00434200 |
| H | 0  | 7.65371600  | -1.01782800 | -1.96144300 |
| H | 0  | 7.69718100  | -1.29967400 | -0.23176900 |
| C | 0  | 7.15602900  | 0.72211200  | -0.78874200 |
| H | 0  | 7.46348300  | 1.22225100  | 0.13348500  |
| H | 0  | 7.32506400  | 1.42355100  | -1.60908700 |
| S | 0  | 5.34245600  | 0.48235600  | -0.73555600 |

|   |    |             |             |             |
|---|----|-------------|-------------|-------------|
| C | 0  | 5.15671100  | -0.26165500 | 0.91522200  |
| H | 0  | 4.09147700  | -0.44029400 | 1.06492100  |
| H | 0  | 5.68326500  | -1.21288200 | 0.98853200  |
| H | 0  | 5.51608500  | 0.42519700  | 1.68452400  |
| C | -1 | 10.20332200 | -1.72706900 | -0.99281400 |
| O | -1 | 9.72505300  | -2.71198900 | -0.45314100 |
| N | -1 | 11.40808800 | -1.71457000 | -1.61424400 |
| H | -1 | 11.71427900 | -0.83869400 | -2.00637900 |
| C | -1 | 12.28233300 | -2.87242100 | -1.64247200 |
| H | -1 | 11.74067400 | -3.70401900 | -1.19504300 |
| H | -1 | 12.55467600 | -3.13109600 | -2.66920400 |
| H | -1 | 13.19588800 | -2.69308900 | -1.06793300 |
| C | -1 | -8.50776400 | 1.43255800  | -4.01018100 |
| H | -1 | -9.41813300 | 1.87700400  | -4.41570500 |
| C | -1 | -8.20962000 | 2.07100600  | -2.67062600 |
| O | -1 | -9.03183900 | 2.06754700  | -1.75783700 |
| H | -1 | -7.69832700 | 1.53829600  | -4.73406300 |
| H | -1 | -8.70445800 | 0.37108700  | -3.84693100 |
| N | -1 | -6.98463800 | 2.63555600  | -2.53759000 |
| H | -1 | -6.33715000 | 2.60416400  | -3.30975700 |
| C | -1 | -6.47975100 | 3.13569400  | -1.26197200 |
| H | -1 | -6.83453500 | 2.43724700  | -0.49642800 |
| C | 0  | -4.95467000 | 3.12736100  | -1.29824100 |
| H | 0  | -4.59695300 | 3.84995500  | -2.03223900 |
| H | 0  | -4.55699700 | 3.42232900  | -0.33105600 |
| S | 0  | -4.29344300 | 1.45844300  | -1.70291600 |
| H | 0  | -3.06389000 | 1.73964100  | -1.20462400 |
| C | -1 | -6.95243200 | 4.54588500  | -0.83509100 |
| O | -1 | -6.16789200 | 5.46547100  | -0.66274300 |
| N | -1 | -8.29061500 | 4.62614800  | -0.64808500 |
| H | -1 | -8.83610800 | 3.78833200  | -0.83281700 |
| C | -1 | -8.95036700 | 5.85761500  | -0.25687900 |
| H | -1 | -9.46655900 | 5.73923000  | 0.70024600  |
| H | -1 | -8.18899200 | 6.62925200  | -0.15650900 |
| H | -1 | -9.67903900 | 6.16827900  | -1.01125000 |
| C | -1 | -5.35556700 | 0.46612900  | 1.78273600  |

|    |    |             |             |             |
|----|----|-------------|-------------|-------------|
| H  | -1 | -5.20374300 | 1.16966600  | 0.96210400  |
| C  | -1 | -4.52921400 | -0.76455700 | 1.47891000  |
| O  | -1 | -3.30416900 | -0.72008800 | 1.40235100  |
| H  | -1 | -6.42201500 | 0.25999000  | 1.88398600  |
| H  | -1 | -4.98698700 | 0.92471900  | 2.70190800  |
| N  | -1 | -5.22463200 | -1.90630800 | 1.28357700  |
| H  | -1 | -6.22692900 | -1.91766800 | 1.41400100  |
| C  | -1 | -4.61854600 | -3.16231500 | 0.97693200  |
| H  | -1 | -3.88402300 | -2.99079500 | 0.18473200  |
| C  | 0  | -3.82679100 | -3.70729700 | 2.20222900  |
| H  | 0  | -3.32440700 | -2.84944900 | 2.64960400  |
| H  | 0  | -4.52795900 | -4.10979300 | 2.93909900  |
| C  | 0  | -2.77086100 | -4.73785000 | 1.81524700  |
| H  | 0  | -3.21590300 | -5.69391400 | 1.53351000  |
| H  | 0  | -2.18608800 | -4.36098500 | 0.97367800  |
| S  | 0  | -1.60109400 | -5.01347100 | 3.19507200  |
| C  | 0  | -0.31975500 | -5.93811000 | 2.29477800  |
| H  | 0  | -0.71785500 | -6.87552500 | 1.90045200  |
| H  | 0  | 0.08856200  | -5.33487100 | 1.48243100  |
| H  | 0  | 0.47978600  | -6.16334300 | 3.00191600  |
| C  | -1 | -5.63382800 | -4.24134700 | 0.50865600  |
| O  | -1 | -6.77472900 | -4.26419600 | 0.94357200  |
| N  | -1 | -5.11824700 | -5.14296200 | -0.36070700 |
| H  | -1 | -4.20562400 | -4.95676000 | -0.74835600 |
| C  | -1 | -5.88864400 | -6.26380400 | -0.87015700 |
| H  | -1 | -6.84349500 | -6.27199800 | -0.34788300 |
| H  | -1 | -6.07376900 | -6.16068900 | -1.94330200 |
| H  | -1 | -5.36922000 | -7.20781300 | -0.68745400 |
| Se | 0  | -0.80472900 | -0.94940500 | -0.96880800 |
| Se | 0  | -0.40396400 | -1.80799000 | 1.16693900  |
| C  | 0  | -1.73160700 | -2.45116900 | -1.75989300 |
| C  | 0  | -2.87461800 | -2.18787000 | -2.51829300 |
| C  | 0  | -3.55175400 | -3.23535300 | -3.14034300 |
| C  | 0  | -3.10021100 | -4.54618900 | -2.99771000 |
| C  | 0  | -1.96613700 | -4.80689500 | -2.22629200 |
| C  | 0  | -1.27574000 | -3.76292700 | -1.61473900 |

|   |   |             |             |             |
|---|---|-------------|-------------|-------------|
| C | 0 | 1.38417700  | -2.55130600 | 1.01674800  |
| C | 0 | 1.93635800  | -3.04553600 | 2.20354400  |
| C | 0 | 3.19818000  | -3.63462700 | 2.18957300  |
| C | 0 | 3.91900400  | -3.72959800 | 0.99965100  |
| C | 0 | 3.36895500  | -3.22597200 | -0.17683700 |
| C | 0 | 2.10434900  | -2.63898900 | -0.17352500 |
| H | 0 | -3.24078800 | -1.17287100 | -2.61422200 |
| H | 0 | -4.44072700 | -3.02519400 | -3.72383600 |
| H | 0 | -3.62879900 | -5.35995000 | -3.48049800 |
| H | 0 | -1.60760700 | -5.82381300 | -2.11155100 |
| H | 0 | -0.39028300 | -3.96763500 | -1.02678500 |
| H | 0 | 1.38104700  | -2.97853800 | 3.13280300  |
| H | 0 | 3.61807100  | -4.01692500 | 3.11334800  |
| H | 0 | 4.90321700  | -4.18311600 | 0.99184800  |
| H | 0 | 3.92710300  | -3.27848500 | -1.10476200 |
| H | 0 | 1.68587900  | -2.24298600 | -1.09059800 |

B) **TS1 img= -1128.7924 cm<sup>-1</sup>**

E= -8828.083026 Ha

G= -8827.663793 Ha

|   |    |             |            |            |
|---|----|-------------|------------|------------|
| C | -1 | 0.98897400  | 5.51820400 | 5.09336000 |
| H | -1 | 1.51000300  | 6.25360200 | 5.70717300 |
| C | -1 | 1.96623600  | 4.94811500 | 4.08444500 |
| O | -1 | 3.08092000  | 4.57552900 | 4.39358100 |
| H | -1 | 0.11147500  | 5.98004200 | 4.63697200 |
| H | -1 | 0.66079300  | 4.71270700 | 5.75470700 |
| N | -1 | 1.50365200  | 4.90162200 | 2.78350600 |
| H | -1 | 0.51243400  | 5.04907900 | 2.64708200 |
| C | -1 | 2.18335600  | 4.24485700 | 1.78023100 |
| H | -1 | 3.22463400  | 4.16977900 | 2.11152500 |
| C | 0  | 1.71315500  | 2.81451000 | 1.43493100 |
| H | 0  | 2.35653400  | 2.46016200 | 0.62830600 |
| H | 0  | 1.90874400  | 2.18201100 | 2.30455400 |
| C | 0  | 0.27841400  | 2.62725700 | 1.03011400 |
| N | 0  | -0.56267600 | 1.82132500 | 1.78465000 |
| H | 0  | -0.28978200 | 1.31404800 | 2.61559400 |

|   |    |             |             |             |
|---|----|-------------|-------------|-------------|
| C | 0  | -1.74861500 | 1.69579200  | 1.16511600  |
| H | 0  | -2.52877300 | 1.00799900  | 1.45553500  |
| N | 0  | -1.73140600 | 2.40592700  | 0.04868500  |
| C | 0  | -0.47866400 | 2.99166700  | -0.05966600 |
| H | 0  | -0.20060900 | 3.60301700  | -0.90063400 |
| C | -1 | 2.24130000  | 5.12221400  | 0.47557600  |
| O | -1 | 2.35763500  | 4.61730000  | -0.62831600 |
| N | -1 | 2.18695800  | 6.45895300  | 0.69674700  |
| H | -1 | 2.10003400  | 6.76846500  | 1.65128300  |
| C | -1 | 2.30113400  | 7.43300000  | -0.37293000 |
| H | -1 | 2.36741800  | 6.88318200  | -1.31017700 |
| H | -1 | 1.42583500  | 8.08754300  | -0.40189600 |
| H | -1 | 3.19951100  | 8.04571600  | -0.25491700 |
| C | -1 | 10.46345300 | 3.04453500  | -3.09244000 |
| H | -1 | 11.37932700 | 3.61640100  | -2.94397500 |
| C | -1 | 10.28345100 | 2.10088800  | -1.91778100 |
| O | -1 | 10.48790800 | 2.44535700  | -0.76996800 |
| H | -1 | 10.50228400 | 2.53541300  | -4.05749700 |
| H | -1 | 9.63001000  | 3.75157600  | -3.10126500 |
| N | -1 | 9.88750600  | 0.82375800  | -2.25021600 |
| H | -1 | 9.55660300  | 0.66495700  | -3.19096300 |
| C | -1 | 9.40881600  | -0.12951800 | -1.21348100 |
| H | -1 | 9.70597700  | 0.31896100  | -0.26192900 |
| C | 0  | 7.89536000  | -0.34481300 | -1.25909600 |
| H | 0  | 7.60074000  | -0.66031200 | -2.26576200 |
| H | 0  | 7.66848600  | -1.17419500 | -0.58848200 |
| C | 0  | 7.11221900  | 0.90104900  | -0.85640000 |
| H | 0  | 7.38931300  | 1.22658700  | 0.14998500  |
| H | 0  | 7.32135400  | 1.73107000  | -1.53566400 |
| S | 0  | 5.29516300  | 0.70281800  | -0.92567100 |
| C | 0  | 5.02531900  | -0.50590900 | 0.40953000  |
| H | 0  | 3.94595600  | -0.62660200 | 0.51154700  |
| H | 0  | 5.46354200  | -1.47557800 | 0.17320700  |
| H | 0  | 5.43105900  | -0.13455500 | 1.35303200  |
| C | -1 | 10.17594000 | -1.47624800 | -1.33495100 |
| O | -1 | 9.71511500  | -2.50200000 | -0.86004000 |



|   |    |             |             |             |
|---|----|-------------|-------------|-------------|
| N | -1 | 11.37602200 | -1.40474500 | -1.96142100 |
| H | -1 | 11.66724200 | -0.50019900 | -2.29559000 |
| C | -1 | 12.26618700 | -2.54535400 | -2.07251000 |
| H | -1 | 11.73930700 | -3.41282600 | -1.67877400 |
| H | -1 | 12.53507100 | -2.73059900 | -3.11589500 |
| H | -1 | 13.18106600 | -2.39181600 | -1.49263000 |
| C | -1 | -8.59789000 | 1.60843600  | -4.02272500 |
| H | -1 | -9.51715200 | 2.06591200  | -4.39208400 |
| C | -1 | -8.29966900 | 2.16013200  | -2.64513600 |
| O | -1 | -9.11532600 | 2.08324200  | -1.72975000 |
| H | -1 | -7.79500000 | 1.77417200  | -4.74263900 |
| H | -1 | -8.77858200 | 0.53567700  | -3.93000300 |
| N | -1 | -7.08130100 | 2.73062800  | -2.48144100 |
| H | -1 | -6.43924900 | 2.76199900  | -3.25808900 |
| C | -1 | -6.57493300 | 3.15071600  | -1.17901200 |
| H | -1 | -6.91499700 | 2.40052100  | -0.45799600 |
| C | 0  | -5.03700900 | 3.23939600  | -1.20889500 |
| H | 0  | -4.76977200 | 4.03352100  | -1.90980700 |
| H | 0  | -4.71711900 | 3.58777600  | -0.22822500 |
| S | 0  | -4.09148100 | 1.72138800  | -1.61720100 |
| H | 0  | -2.71714300 | 2.18948500  | -0.76966600 |
| C | -1 | -7.06461900 | 4.52422200  | -0.65602300 |
| O | -1 | -6.29171800 | 5.44084200  | -0.42534100 |
| N | -1 | -8.40237100 | 4.57200900  | -0.45490000 |
| H | -1 | -8.93735200 | 3.74072700  | -0.69237600 |
| C | -1 | -9.07660500 | 5.76484000  | 0.02195800  |
| H | -1 | -9.58450700 | 5.57506600  | 0.97199800  |
| H | -1 | -8.32543400 | 6.53890500  | 0.16944400  |
| H | -1 | -9.81471500 | 6.11487600  | -0.70551800 |
| C | -1 | -5.39276500 | 0.30101700  | 1.67363100  |
| H | -1 | -5.25645600 | 1.06019900  | 0.90104900  |
| C | -1 | -4.55142900 | -0.89409600 | 1.28240600  |
| O | -1 | -3.32757300 | -0.82777300 | 1.20268300  |
| H | -1 | -6.45552000 | 0.07323900  | 1.76691100  |
| H | -1 | -5.02435500 | 0.70222000  | 2.61915200  |
| N | -1 | -5.23217100 | -2.03035800 | 1.01499700  |

|    |    |             |             |             |
|----|----|-------------|-------------|-------------|
| H  | -1 | -6.23319700 | -2.06494900 | 1.15058500  |
| C  | -1 | -4.61050400 | -3.25420100 | 0.62143100  |
| H  | -1 | -3.88393200 | -3.01931700 | -0.16184000 |
| C  | 0  | -3.82083800 | -3.86941900 | 1.81438100  |
| H  | 0  | -3.33366900 | -3.03813700 | 2.32417800  |
| H  | 0  | -4.52779200 | -4.32547700 | 2.51399400  |
| C  | 0  | -2.74751100 | -4.86331500 | 1.38567300  |
| H  | 0  | -3.17707500 | -5.77878200 | 0.97460200  |
| H  | 0  | -2.10503600 | -4.40505400 | 0.63028300  |
| S  | 0  | -1.68512000 | -5.29854700 | 2.81049900  |
| C  | 0  | -0.34637800 | -6.14857100 | 1.92223200  |
| H  | 0  | -0.72599500 | -7.02322300 | 1.38964500  |
| H  | 0  | 0.14309200  | -5.46824600 | 1.22420100  |
| H  | 0  | 0.38267400  | -6.47517400 | 2.66454200  |
| C  | -1 | -5.61428700 | -4.31314000 | 0.08683900  |
| O  | -1 | -6.75122100 | -4.38248700 | 0.52698700  |
| N  | -1 | -5.09177800 | -5.14722800 | -0.84315900 |
| H  | -1 | -4.18499300 | -4.92181500 | -1.22423600 |
| C  | -1 | -5.84921900 | -6.24350400 | -1.42165800 |
| H  | -1 | -6.80084900 | -6.29967700 | -0.89625700 |
| H  | -1 | -6.04372500 | -6.07047700 | -2.48511300 |
| H  | -1 | -5.31598600 | -7.18923200 | -1.30664300 |
| Se | 0  | -0.18909800 | -0.93948400 | -0.63337100 |
| Se | 0  | -0.34036300 | -1.96615800 | 1.47020500  |
| C  | 0  | -1.31933400 | -2.13752400 | -1.64593200 |
| C  | 0  | -2.49941900 | -1.62918300 | -2.19014200 |
| C  | 0  | -3.31898800 | -2.45585400 | -2.95690400 |
| C  | 0  | -2.97022300 | -3.78871900 | -3.16751500 |
| C  | 0  | -1.79770800 | -4.29822900 | -2.60558100 |
| C  | 0  | -0.96682000 | -3.47334500 | -1.85072500 |
| C  | 0  | 1.34753200  | -2.91015400 | 1.61300000  |
| C  | 0  | 1.70266000  | -3.33981100 | 2.89547200  |
| C  | 0  | 2.86631800  | -4.08139400 | 3.08151900  |
| C  | 0  | 3.68718700  | -4.38959300 | 1.99726700  |
| C  | 0  | 3.33442400  | -3.94929800 | 0.72330300  |
| C  | 0  | 2.16644100  | -3.21411700 | 0.52672300  |

|   |   |             |             |             |
|---|---|-------------|-------------|-------------|
| H | 0 | -2.78712100 | -0.60298300 | -2.00323100 |
| H | 0 | -4.23592000 | -2.05645700 | -3.37454700 |
| H | 0 | -3.60745900 | -4.42841600 | -3.76767800 |
| H | 0 | -1.52170000 | -5.33441000 | -2.76682800 |
| H | 0 | -0.05249900 | -3.86655600 | -1.42454500 |
| H | 0 | 1.07098700  | -3.10166500 | 3.74379600  |
| H | 0 | 3.13395200  | -4.41207000 | 4.07893500  |
| H | 0 | 4.59621200  | -4.96064300 | 2.14553200  |
| H | 0 | 3.96896600  | -4.17626800 | -0.12618300 |
| H | 0 | 1.90341900  | -2.86566800 | -0.46418200 |

C) **Zwit**

E= -8828.086565 Ha

G= -8827.662040 Ha

|   |    |             |            |             |
|---|----|-------------|------------|-------------|
| C | -1 | 0.95780000  | 5.48603900 | 5.15744000  |
| H | -1 | 1.47641100  | 6.21546000 | 5.78036500  |
| C | -1 | 1.93981900  | 4.92324300 | 4.14905900  |
| O | -1 | 3.05232400  | 4.54655600 | 4.46108700  |
| H | -1 | 0.08342100  | 5.95294400 | 4.70022300  |
| H | -1 | 0.62494700  | 4.67536300 | 5.81006700  |
| N | -1 | 1.48450900  | 4.88841200 | 2.84544100  |
| H | -1 | 0.49408400  | 5.03851900 | 2.70465000  |
| C | -1 | 2.16814400  | 4.23956200 | 1.83952200  |
| H | -1 | 3.20793800  | 4.16006400 | 2.17671400  |
| C | 0  | 1.72483200  | 2.80371900 | 1.49018200  |
| H | 0  | 2.40784800  | 2.44357100 | 0.71925500  |
| H | 0  | 1.88278500  | 2.18325200 | 2.37556500  |
| C | 0  | 0.31816200  | 2.59930000 | 1.01526600  |
| N | 0  | -0.54433200 | 1.75145800 | 1.69951500  |
| H | 0  | -0.30363300 | 1.22455700 | 2.52904100  |
| C | 0  | -1.69271000 | 1.61226600 | 1.02892300  |
| H | 0  | -2.48334100 | 0.90647000 | 1.25574000  |
| N | 0  | -1.61694700 | 2.37070600 | -0.05623000 |
| C | 0  | -0.37935400 | 2.98969500 | -0.09948600 |
| H | 0  | -0.07983100 | 3.62905700 | -0.91026900 |
| C | -1 | 2.23529200  | 5.12780300 | 0.54336000  |

|   |    |             |             |             |
|---|----|-------------|-------------|-------------|
| O | -1 | 2.35656800  | 4.63221400  | -0.56416200 |
| N | -1 | 2.18106200  | 6.46270800  | 0.77565500  |
| H | -1 | 2.08935300  | 6.76416900  | 1.73231800  |
| C | -1 | 2.30242100  | 7.44570700  | -0.28500700 |
| H | -1 | 2.37312800  | 6.90382900  | -1.22654500 |
| H | -1 | 1.42814600  | 8.10165400  | -0.31316400 |
| H | -1 | 3.20093400  | 8.05617900  | -0.15684000 |
| C | -1 | 10.47381100 | 3.06963000  | -2.99722800 |
| H | -1 | 11.38960100 | 3.63896900  | -2.83886700 |
| C | -1 | 10.28616200 | 2.11621500  | -1.83168400 |
| O | -1 | 10.48474400 | 2.45059300  | -0.67986700 |
| H | -1 | 10.51727100 | 2.56872300  | -3.96637800 |
| H | -1 | 9.64134900  | 3.77784400  | -3.00456900 |
| N | -1 | 9.89025000  | 0.84258800  | -2.17718000 |
| H | -1 | 9.56447800  | 0.69215900  | -3.12107800 |
| C | -1 | 9.40491100  | -0.11893200 | -1.15125400 |
| H | -1 | 9.69719200  | 0.32100200  | -0.19430500 |
| C | 0  | 7.89218000  | -0.33706100 | -1.20974300 |
| H | 0  | 7.60353800  | -0.61972300 | -2.22786100 |
| H | 0  | 7.66677600  | -1.18994900 | -0.56891100 |
| C | 0  | 7.09930600  | 0.88820100  | -0.76675700 |
| H | 0  | 7.35872600  | 1.16903900  | 0.25768900  |
| H | 0  | 7.31540700  | 1.74846600  | -1.40508700 |
| S | 0  | 5.28415400  | 0.68685400  | -0.87822800 |
| C | 0  | 4.99782300  | -0.62601500 | 0.35158800  |
| H | 0  | 3.91708200  | -0.75324200 | 0.42939100  |
| H | 0  | 5.43816300  | -1.57399900 | 0.04250400  |
| H | 0  | 5.39128900  | -0.33400100 | 1.32757000  |
| C | -1 | 10.17068100 | -1.46565300 | -1.28022500 |
| O | -1 | 9.70603900  | -2.49475600 | -0.81643100 |
| N | -1 | 11.37437800 | -1.39037500 | -1.89930000 |
| H | -1 | 11.66859100 | -0.48340500 | -2.22414800 |
| C | -1 | 12.26363900 | -2.53119800 | -2.01529500 |
| H | -1 | 11.73347600 | -3.40129300 | -1.63188200 |
| H | -1 | 12.53799900 | -2.70788400 | -3.05873700 |
| H | -1 | 13.17552100 | -2.38385900 | -1.42912300 |

|   |    |             |             |             |
|---|----|-------------|-------------|-------------|
| C | -1 | -8.58399700 | 1.66726300  | -4.04409800 |
| H | -1 | -9.50062300 | 2.12911800  | -4.41455700 |
| C | -1 | -8.29246900 | 2.20642000  | -2.66017900 |
| O | -1 | -9.11338400 | 2.12315300  | -1.75001200 |
| H | -1 | -7.77695500 | 1.83806100  | -4.75816100 |
| H | -1 | -8.76659300 | 0.59399400  | -3.96154400 |
| N | -1 | -7.07481300 | 2.77538100  | -2.48521400 |
| H | -1 | -6.42795300 | 2.81089300  | -3.25772900 |
| C | -1 | -6.57476600 | 3.18418300  | -1.17542600 |
| H | -1 | -6.91947600 | 2.42513800  | -0.46501700 |
| C | 0  | -5.03406100 | 3.24456700  | -1.19705500 |
| H | 0  | -4.75565400 | 4.12479600  | -1.78073800 |
| H | 0  | -4.71644400 | 3.45788200  | -0.17476500 |
| S | 0  | -4.13285700 | 1.78081400  | -1.83726800 |
| H | 0  | -2.39340400 | 2.31330000  | -0.79936000 |
| C | -1 | -7.06534000 | 4.55168800  | -0.64310700 |
| O | -1 | -6.29264900 | 5.46582600  | -0.40193900 |
| N | -1 | -8.40420800 | 4.60001100  | -0.45015700 |
| H | -1 | -8.93894600 | 3.77147100  | -0.69754000 |
| C | -1 | -9.07947800 | 5.78959100  | 0.03330700  |
| H | -1 | -9.59283000 | 5.59239000  | 0.97889500  |
| H | -1 | -8.32812000 | 6.56135200  | 0.19151800  |
| H | -1 | -9.81313000 | 6.14682600  | -0.69517800 |
| C | -1 | -5.41189000 | 0.30693800  | 1.65814100  |
| H | -1 | -5.27034100 | 1.07245700  | 0.89302600  |
| C | -1 | -4.56992700 | -0.88626500 | 1.26185200  |
| O | -1 | -3.34564800 | -0.82012900 | 1.18850700  |
| H | -1 | -6.47542200 | 0.07975400  | 1.74383700  |
| H | -1 | -5.04813500 | 0.69949600  | 2.60924900  |
| N | -1 | -5.25063100 | -2.01901800 | 0.98086600  |
| H | -1 | -6.25251500 | -2.05337400 | 1.11042000  |
| C | -1 | -4.62856700 | -3.24018300 | 0.57995200  |
| H | -1 | -3.89739400 | -2.99961300 | -0.19723500 |
| C | 0  | -3.84302300 | -3.86621600 | 1.76978500  |
| H | 0  | -3.35020500 | -3.04045600 | 2.28334200  |
| H | 0  | -4.55174700 | -4.32166900 | 2.46785900  |

|    |    |             |             |             |
|----|----|-------------|-------------|-------------|
| C  | 0  | -2.77677700 | -4.86515700 | 1.33390000  |
| H  | 0  | -3.21365900 | -5.78260400 | 0.93530400  |
| H  | 0  | -2.14310100 | -4.41385800 | 0.56616400  |
| S  | 0  | -1.69724300 | -5.29223600 | 2.74789000  |
| C  | 0  | -0.38991200 | -6.18145700 | 1.85159900  |
| H  | 0  | -0.79101800 | -7.06817800 | 1.35603200  |
| H  | 0  | 0.08568600  | -5.52698400 | 1.11986000  |
| H  | 0  | 0.35637300  | -6.49151200 | 2.58373600  |
| C  | -1 | -5.63030200 | -4.29392400 | 0.03170400  |
| O  | -1 | -6.77022300 | -4.36459500 | 0.46401600  |
| N  | -1 | -5.10408300 | -5.12041900 | -0.90348300 |
| H  | -1 | -4.19451200 | -4.89340300 | -1.27626900 |
| C  | -1 | -5.86046200 | -6.20948700 | -1.49605700 |
| H  | -1 | -6.81443900 | -6.26969900 | -0.97559300 |
| H  | -1 | -6.04831200 | -6.02795100 | -2.55826300 |
| H  | -1 | -5.32850600 | -7.15771800 | -1.38543800 |
| Se | 0  | -0.15499400 | -0.98136100 | -0.68531100 |
| Se | 0  | -0.33374900 | -2.02926900 | 1.40981200  |
| C  | 0  | -1.38559800 | -2.08024300 | -1.69113000 |
| C  | 0  | -2.57838700 | -1.50400100 | -2.12965500 |
| C  | 0  | -3.46192100 | -2.25598600 | -2.90248700 |
| C  | 0  | -3.16376500 | -3.57920700 | -3.22195000 |
| C  | 0  | -1.98009200 | -4.15862600 | -2.75919200 |
| C  | 0  | -1.08528600 | -3.40908500 | -1.99845400 |
| C  | 0  | 1.33637000  | -3.00597100 | 1.53575900  |
| C  | 0  | 1.72402000  | -3.40110100 | 2.81948600  |
| C  | 0  | 2.87753300  | -4.16184300 | 2.99255000  |
| C  | 0  | 3.65670100  | -4.52098900 | 1.89355000  |
| C  | 0  | 3.27093100  | -4.11594600 | 0.61729100  |
| C  | 0  | 2.11132600  | -3.36471500 | 0.43388400  |
| H  | 0  | -2.83339400 | -0.48878000 | -1.85250000 |
| H  | 0  | -4.38819300 | -1.80410400 | -3.23758500 |
| H  | 0  | -3.85101100 | -4.15934600 | -3.82733900 |
| H  | 0  | -1.74512300 | -5.18869500 | -3.00361300 |
| H  | 0  | -0.16155900 | -3.85316500 | -1.64870000 |
| H  | 0  | 1.12644400  | -3.12055100 | 3.67940600  |

|   |   |            |             |             |
|---|---|------------|-------------|-------------|
| H | 0 | 3.17088500 | -4.46573400 | 3.99122800  |
| H | 0 | 4.55914900 | -5.10485400 | 2.03158800  |
| H | 0 | 3.87256500 | -4.38417600 | -0.24403300 |
| H | 0 | 1.82024000 | -3.04757400 | -0.55972300 |

D) **TCI**

E= -8828.090397 Ha

G= -8827.663536 Ha

|   |    |             |            |             |
|---|----|-------------|------------|-------------|
| C | -1 | 2.23282100  | 5.44214100 | 5.21505000  |
| H | -1 | 2.81726000  | 6.19021700 | 5.75157500  |
| C | -1 | 3.13815600  | 4.73819000 | 4.22370700  |
| O | -1 | 4.24029100  | 4.32449100 | 4.52548700  |
| H | -1 | 1.36705300  | 5.91909500 | 4.75185900  |
| H | -1 | 1.88354600  | 4.71129400 | 5.94838200  |
| N | -1 | 2.62635800  | 4.61906100 | 2.94616100  |
| H | -1 | 1.64080100  | 4.81478500 | 2.83022100  |
| C | -1 | 3.22960500  | 3.84731800 | 1.97632800  |
| H | -1 | 4.27668300  | 3.73562700 | 2.27951400  |
| C | 0  | 2.66530400  | 2.42621200 | 1.77069400  |
| H | 0  | 3.33769200  | 1.90575100 | 1.08533000  |
| H | 0  | 2.71531800  | 1.90506300 | 2.72910000  |
| C | 0  | 1.27031800  | 2.30515100 | 1.23324100  |
| N | 0  | 0.37678500  | 1.38773000 | 1.77212500  |
| H | 0  | 0.57718600  | 0.76524500 | 2.54426500  |
| C | 0  | -0.74020200 | 1.32123200 | 1.04594100  |
| H | 0  | -1.55789400 | 0.63057700 | 1.22363700  |
| N | 0  | -0.60715100 | 2.20623000 | 0.05900900  |
| C | 0  | 0.62732900  | 2.82571800 | 0.14251700  |
| H | 0  | 0.96087900  | 3.53545300 | -0.59081800 |
| C | -1 | 3.29048400  | 4.61603700 | 0.60541800  |
| O | -1 | 3.33678400  | 4.02128700 | -0.45811300 |
| N | -1 | 3.32057800  | 5.96675500 | 0.72151100  |
| H | -1 | 3.28662700  | 6.35376600 | 1.65079200  |
| C | -1 | 3.45105700  | 6.84661200 | -0.42515500 |
| H | -1 | 3.45133000  | 6.22301800 | -1.31748600 |
| H | -1 | 2.61419100  | 7.54824900 | -0.47784500 |

|   |    |             |             |             |
|---|----|-------------|-------------|-------------|
| H | -1 | 4.38676100  | 7.41165300  | -0.38498700 |
| C | -1 | 11.24349600 | 1.77968400  | -3.04850200 |
| H | -1 | 12.19543500 | 2.30537600  | -2.97531800 |
| C | -1 | 11.05297700 | 0.94213900  | -1.79753700 |
| O | -1 | 11.31878100 | 1.36141300  | -0.68781100 |
| H | -1 | 11.21768900 | 1.19608900  | -3.97088900 |
| H | -1 | 10.45213300 | 2.53261500  | -3.08663300 |
| N | -1 | 10.57268400 | -0.33087100 | -2.01477900 |
| H | -1 | 10.19890500 | -0.54173800 | -2.92885300 |
| C | -1 | 10.07844100 | -1.17023800 | -0.89125700 |
| H | -1 | 10.43561700 | -0.66902000 | 0.01227800  |
| C | 0  | 8.56042500  | -1.32617000 | -0.89190000 |
| H | 0  | 8.23070400  | -1.63130900 | -1.89115300 |
| H | 0  | 8.33342800  | -2.15246300 | -0.21955300 |
| C | 0  | 7.81260800  | -0.07229000 | -0.45935100 |
| H | 0  | 8.08627400  | 0.20849800  | 0.56145900  |
| H | 0  | 8.04361500  | 0.77615000  | -1.10824100 |
| S | 0  | 5.99277200  | -0.24955200 | -0.56564700 |
| C | 0  | 5.72796000  | -1.70496200 | 0.49586500  |
| H | 0  | 4.65347000  | -1.88040500 | 0.52317600  |
| H | 0  | 6.20802300  | -2.59322100 | 0.08588300  |
| H | 0  | 6.08974300  | -1.52076300 | 1.50989300  |
| C | -1 | 10.76224400 | -2.56638400 | -0.92959900 |
| O | -1 | 10.26124600 | -3.52285300 | -0.36038600 |
| N | -1 | 11.94076100 | -2.61553600 | -1.59797200 |
| H | -1 | 12.27079400 | -1.75862900 | -2.01206500 |
| C | -1 | 12.75945400 | -3.81264200 | -1.64682000 |
| H | -1 | 12.19857200 | -4.61393900 | -1.16882600 |
| H | -1 | 12.97883500 | -4.09376000 | -2.68031300 |
| H | -1 | 13.70227500 | -3.66987000 | -1.11059300 |
| C | -1 | -7.89007600 | 1.42126900  | -3.24998400 |
| H | -1 | -8.79457000 | 1.90311300  | -3.62478000 |
| C | -1 | -7.51031800 | 2.05862100  | -1.93070500 |
| O | -1 | -8.29502300 | 2.10203800  | -0.98647200 |
| H | -1 | -7.10596300 | 1.48243800  | -4.00615900 |
| H | -1 | -8.12836400 | 0.37165200  | -3.06672600 |



|   |    |             |             |             |
|---|----|-------------|-------------|-------------|
| N | -1 | -6.25657400 | 2.56747600  | -1.85230300 |
| H | -1 | -5.64223400 | 2.49855400  | -2.64876800 |
| C | -1 | -5.67896700 | 3.05617800  | -0.60317300 |
| H | -1 | -6.03514100 | 2.38275500  | 0.18359700  |
| C | 0  | -4.12384200 | 2.92445300  | -0.59532500 |
| H | 0  | -3.72027200 | 3.89153300  | -0.30337000 |
| H | 0  | -3.83612700 | 2.19986700  | 0.16369600  |
| S | 0  | -3.25839800 | 2.44770100  | -2.14069800 |
| H | 0  | -1.30825200 | 2.36515100  | -0.67731700 |
| C | -1 | -6.06985000 | 4.49107900  | -0.17502500 |
| O | -1 | -5.23793200 | 5.37518900  | -0.04411400 |
| N | -1 | -7.39449300 | 4.63469200  | 0.06333300  |
| H | -1 | -7.98452100 | 3.82108400  | -0.09006300 |
| C | -1 | -7.98136900 | 5.89904900  | 0.46558900  |
| H | -1 | -8.46411200 | 5.81405900  | 1.44349100  |
| H | -1 | -7.18221300 | 6.63576800  | 0.52704700  |
| H | -1 | -8.72441700 | 6.23542800  | -0.26330100 |
| C | -1 | -4.55829200 | 0.36827900  | 2.42621700  |
| H | -1 | -4.40710300 | 1.05588700  | 1.59199400  |
| C | -1 | -3.80162400 | -0.90205600 | 2.10458500  |
| O | -1 | -2.57977600 | -0.91484700 | 1.97993000  |
| H | -1 | -5.62818300 | 0.21247300  | 2.57145200  |
| H | -1 | -4.13306600 | 0.81851500  | 3.32477400  |
| N | -1 | -4.55561700 | -2.01250000 | 1.95002100  |
| H | -1 | -5.55139800 | -1.97641800 | 2.11979600  |
| C | -1 | -4.02000100 | -3.29805900 | 1.63478300  |
| H | -1 | -3.31040800 | -3.16844100 | 0.81248900  |
| C | 0  | -3.23078100 | -3.85907200 | 2.85056100  |
| H | 0  | -2.55955800 | -3.06097400 | 3.17187700  |
| H | 0  | -3.92943600 | -4.05950200 | 3.66827900  |
| C | 0  | -2.40805800 | -5.10339200 | 2.52848400  |
| H | 0  | -3.03734000 | -5.98899000 | 2.42739700  |
| H | 0  | -1.85841800 | -4.96787400 | 1.59307200  |
| S | 0  | -1.19103500 | -5.40394800 | 3.86186200  |
| C | 0  | -0.36143800 | -6.86871700 | 3.17231700  |
| H | 0  | -1.06487500 | -7.69509500 | 3.05123600  |

|    |    |             |             |             |
|----|----|-------------|-------------|-------------|
| H  | 0  | 0.10285900  | -6.63334400 | 2.21243100  |
| H  | 0  | 0.41537800  | -7.16571500 | 3.87866800  |
| C  | -1 | -5.10125700 | -4.33378400 | 1.21924100  |
| O  | -1 | -6.22386600 | -4.29979300 | 1.69869400  |
| N  | -1 | -4.66213100 | -5.26682800 | 0.34105800  |
| H  | -1 | -3.75806800 | -5.12663500 | -0.08419300 |
| C  | -1 | -5.50245200 | -6.35596600 | -0.12473300 |
| H  | -1 | -6.43524500 | -6.31501200 | 0.43455200  |
| H  | -1 | -5.72503300 | -6.25510100 | -1.19094600 |
| H  | -1 | -5.01979700 | -7.32103500 | 0.04858400  |
| Se | 0  | -2.66561500 | 0.04457400  | -1.85965100 |
| Se | 0  | -1.77091200 | -2.56941600 | -1.51036400 |
| C  | 0  | -4.41947200 | -0.70444100 | -2.17915300 |
| C  | 0  | -5.37632400 | -0.70284500 | -1.16370000 |
| C  | 0  | -6.58990900 | -1.36024900 | -1.34390500 |
| C  | 0  | -6.85538900 | -2.01891000 | -2.54350800 |
| C  | 0  | -5.91146400 | -1.99771500 | -3.56906500 |
| C  | 0  | -4.69553500 | -1.33957300 | -3.39136900 |
| C  | 0  | -0.22032400 | -1.98368800 | -0.53746300 |
| C  | 0  | 0.03373600  | -2.45330600 | 0.75795000  |
| C  | 0  | 1.16546700  | -2.03983900 | 1.45598600  |
| C  | 0  | 2.05558800  | -1.13238300 | 0.88135400  |
| C  | 0  | 1.80563600  | -0.64628200 | -0.40189400 |
| C  | 0  | 0.68049500  | -1.06911500 | -1.10602600 |
| H  | 0  | -5.16397400 | -0.20833000 | -0.22777000 |
| H  | 0  | -7.32400600 | -1.36286500 | -0.54627600 |
| H  | 0  | -7.79550400 | -2.54112700 | -2.67960000 |
| H  | 0  | -6.11615500 | -2.50126700 | -4.50731400 |
| H  | 0  | -3.95236800 | -1.33910600 | -4.17906000 |
| H  | 0  | -0.66273500 | -3.13501200 | 1.22493200  |
| H  | 0  | 1.34482600  | -2.42675800 | 2.45384400  |
| H  | 0  | 2.92953300  | -0.80142400 | 1.42954100  |
| H  | 0  | 2.48777000  | 0.06179200  | -0.85917000 |
| H  | 0  | 0.50167100  | -0.69862500 | -2.10847400 |

E) **TS2 img= -1094.2847 cm<sup>-1</sup>**

E= -8828.061401 Ha

G= -8827.639429 Ha

|   |    |             |            |             |
|---|----|-------------|------------|-------------|
| C | -1 | 1.02980000  | 5.68840000 | 4.89300000  |
| H | -1 | 1.55350000  | 6.45020000 | 5.47130000  |
| C | -1 | 2.00820000  | 5.05860000 | 3.92140000  |
| O | -1 | 3.11770000  | 4.69320000 | 4.25670000  |
| H | -1 | 0.15920000  | 6.13340000 | 4.40750000  |
| H | -1 | 0.69060000  | 4.92110000 | 5.59290000  |
| N | -1 | 1.55340000  | 4.94870000 | 2.62160000  |
| H | -1 | 0.70710000  | 5.36990000 | 2.38120000  |
| C | -1 | 2.23300000  | 4.23540000 | 1.65760000  |
| H | -1 | 3.27190000  | 4.16850000 | 1.99990000  |
| C | 0  | 1.89485200  | 2.75294900 | 1.43964700  |
| H | 0  | 2.71192800  | 2.34914700 | 0.84123900  |
| H | 0  | 1.96059100  | 2.26598300 | 2.41678600  |
| C | 0  | 0.62974700  | 2.33381200 | 0.78418500  |
| N | 0  | -0.48000000 | 1.91807400 | 1.50258500  |
| H | 0  | -0.58253600 | 1.97789100 | 2.50585600  |
| C | 0  | -1.33789300 | 1.29538300 | 0.67007300  |
| H | 0  | -2.22534400 | 0.76581200 | 0.98343000  |
| N | 0  | -0.84582600 | 1.30918200 | -0.56570100 |
| C | 0  | 0.37359200  | 1.95908000 | -0.50661100 |
| H | 0  | 1.00779600  | 2.06399500 | -1.36977200 |
| C | -1 | 2.30740000  | 5.04330000 | 0.31020000  |
| O | -1 | 2.42570000  | 4.48100000 | -0.76530000 |
| N | -1 | 2.26300000  | 6.39010000 | 0.46160000  |
| H | -1 | 2.17300000  | 6.74940000 | 1.39820000  |
| C | -1 | 2.39230000  | 7.30650000 | -0.65630000 |
| H | -1 | 2.45960000  | 6.70830000 | -1.56340000 |
| H | -1 | 1.52300000  | 7.96600000 | -0.72490000 |
| H | -1 | 3.29530000  | 7.91690000 | -0.56420000 |
| C | -1 | 10.53260000 | 2.71460000 | -3.09120000 |
| H | -1 | 11.45250000 | 3.28560000 | -2.96640000 |
| C | -1 | 10.33710000 | 1.83460000 | -1.87050000 |
| O | -1 | 10.53750000 | 2.23630000 | -0.74070000 |

|   |    |             |             |             |
|---|----|-------------|-------------|-------------|
| H | -1 | 10.57290000 | 2.15580000  | -4.02830000 |
| H | -1 | 9.70540000  | 3.42720000  | -3.14210000 |
| N | -1 | 9.93200000  | 0.54540000  | -2.13890000 |
| H | -1 | 9.60560000  | 0.34080000  | -3.07240000 |
| C | -1 | 9.43870000  | -0.34880000 | -1.05800000 |
| H | -1 | 9.73390000  | 0.14550000  | -0.12840000 |
| C | 0  | 7.93417600  | -0.59209800 | -1.12086500 |
| H | 0  | 7.65131900  | -0.84461800 | -2.14880800 |
| H | 0  | 7.74516900  | -1.47796600 | -0.51677000 |
| C | 0  | 7.08879100  | 0.56905600  | -0.61833400 |
| H | 0  | 7.34463700  | 0.81211900  | 0.41674300  |
| H | 0  | 7.23942700  | 1.47055200  | -1.21734700 |
| S | 0  | 5.29093200  | 0.22998600  | -0.72463800 |
| C | 0  | 5.18798900  | -1.32747000 | 0.21401500  |
| H | 0  | 4.13402300  | -1.59037300 | 0.27710800  |
| H | 0  | 5.71201600  | -2.13661100 | -0.29392400 |
| H | 0  | 5.58638300  | -1.20270100 | 1.22312700  |
| C | -1 | 10.19470000 | -1.70660000 | -1.10390000 |
| O | -1 | 9.72200000  | -2.70240000 | -0.57980000 |
| N | -1 | 11.39920000 | -1.67770000 | -1.72540000 |
| H | -1 | 11.70040000 | -0.79410000 | -2.10410000 |
| C | -1 | 12.28010000 | -2.83000000 | -1.77150000 |
| H | -1 | 11.74320000 | -3.67140000 | -1.33690000 |
| H | -1 | 12.55370000 | -3.07130000 | -2.80220000 |
| H | -1 | 13.19260000 | -2.65430000 | -1.19440000 |
| C | -1 | -8.53450000 | 1.39260000  | -4.07180000 |
| H | -1 | -9.44740000 | 1.83810000  | -4.47040000 |
| C | -1 | -8.23980000 | 2.01210000  | -2.72260000 |
| O | -1 | -9.06190000 | 1.98990000  | -1.80990000 |
| H | -1 | -7.72580000 | 1.51410000  | -4.79400000 |
| H | -1 | -8.72510000 | 0.32770000  | -3.92490000 |
| N | -1 | -7.01790000 | 2.58110000  | -2.58090000 |
| H | -1 | -6.37050000 | 2.56570000  | -3.35350000 |
| C | -1 | -6.51590000 | 3.06490000  | -1.29660000 |
| H | -1 | -6.86670000 | 2.35250000  | -0.54320000 |
| C | 0  | -4.96116600 | 3.09402300  | -1.32486900 |

|   |    |             |             |             |
|---|----|-------------|-------------|-------------|
| H | 0  | -4.64667400 | 4.13052100  | -1.44880400 |
| H | 0  | -4.55332100 | 2.75108200  | -0.37653300 |
| S | 0  | -4.10061200 | 2.21703500  | -2.68064700 |
| H | 0  | -0.81554300 | 0.07748200  | -1.21335100 |
| C | -1 | -6.99660000 | 4.46580000  | -0.85030000 |
| O | -1 | -6.21710000 | 5.38660000  | -0.66240000 |
| N | -1 | -8.33510000 | 4.53530000  | -0.66100000 |
| H | -1 | -8.87580000 | 3.69730000  | -0.85850000 |
| C | -1 | -9.00180000 | 5.75680000  | -0.25080000 |
| H | -1 | -9.51720000 | 5.62070000  | 0.70440000  |
| H | -1 | -8.24480000 | 6.53110000  | -0.13860000 |
| H | -1 | -9.73230000 | 6.07490000  | -1.00030000 |
| C | -1 | -5.37620000 | 0.35550000  | 1.70630000  |
| H | -1 | -5.22800000 | 1.07140000  | 0.89500000  |
| C | -1 | -4.54300000 | -0.86580000 | 1.38120000  |
| O | -1 | -3.31790000 | -0.81370000 | 1.30760000  |
| H | -1 | -6.44130000 | 0.14130000  | 1.80350000  |
| H | -1 | -5.01000000 | 0.80150000  | 2.63150000  |
| N | -1 | -5.23170000 | -2.00860000 | 1.16970000  |
| H | -1 | -6.23390000 | -2.02770000 | 1.30020000  |
| C | -1 | -4.61830000 | -3.25700000 | 0.84400000  |
| H | -1 | -3.88530000 | -3.06780000 | 0.05430000  |
| C | 0  | -3.87415300 | -3.81370900 | 2.09174700  |
| H | 0  | -3.32242400 | -2.97980700 | 2.52616800  |
| H | 0  | -4.62547300 | -4.13117200 | 2.82161700  |
| C | 0  | -2.89847900 | -4.94642700 | 1.79535000  |
| H | 0  | -3.40695400 | -5.83333700 | 1.41490100  |
| H | 0  | -2.16069000 | -4.62696500 | 1.05488800  |
| S | 0  | -1.99612400 | -5.39823700 | 3.32432500  |
| C | 0  | -0.62611000 | -6.34416800 | 2.59207200  |
| H | 0  | -0.99804000 | -7.20504100 | 2.03278400  |
| H | 0  | -0.02503400 | -5.70661900 | 1.94087700  |
| H | 0  | -0.00302800 | -6.69986000 | 3.41427300  |
| C | -1 | -5.62780000 | -4.33370000 | 0.35910000  |
| O | -1 | -6.76850000 | -4.36970000 | 0.79350000  |
| N | -1 | -5.10710000 | -5.21900000 | -0.52410000 |

|    |    |             |             |             |
|----|----|-------------|-------------|-------------|
| H  | -1 | -4.19570000 | -5.02160000 | -0.90890000 |
| C  | -1 | -5.87120000 | -6.33610000 | -1.05080000 |
| H  | -1 | -6.82600000 | -6.35780000 | -0.52860000 |
| H  | -1 | -6.05710000 | -6.21760000 | -2.12220000 |
| H  | -1 | -5.34640000 | -7.27990000 | -0.88260000 |
| Se | 0  | -3.69144000 | 0.16779800  | -1.93590400 |
| Se | 0  | -0.40473200 | -1.54719100 | -1.45659600 |
| C  | 0  | -5.27815500 | -0.86668100 | -2.32938800 |
| C  | 0  | -6.48454900 | -0.63175300 | -1.66687800 |
| C  | 0  | -7.56934900 | -1.47715200 | -1.87413000 |
| C  | 0  | -7.44469200 | -2.58008900 | -2.71947500 |
| C  | 0  | -6.23765000 | -2.82295100 | -3.37113000 |
| C  | 0  | -5.15592400 | -1.96186100 | -3.18766100 |
| C  | 0  | 0.32840000  | -1.54545600 | 0.33431400  |
| C  | 0  | -0.38759400 | -2.11112100 | 1.39359600  |
| C  | 0  | 0.10497000  | -2.04777500 | 2.69523000  |
| C  | 0  | 1.31213400  | -1.40135400 | 2.95807600  |
| C  | 0  | 2.02818000  | -0.83114700 | 1.90713200  |
| C  | 0  | 1.54454200  | -0.90930100 | 0.60163100  |
| H  | 0  | -6.57134600 | 0.19818000  | -0.98093000 |
| H  | 0  | -8.50516200 | -1.28337400 | -1.36315300 |
| H  | 0  | -8.28453200 | -3.24967100 | -2.86337700 |
| H  | 0  | -6.13727100 | -3.67742700 | -4.03067800 |
| H  | 0  | -4.21912800 | -2.14199500 | -3.70119500 |
| H  | 0  | -1.35217600 | -2.55584400 | 1.20292500  |
| H  | 0  | -0.46219700 | -2.50228600 | 3.49943200  |
| H  | 0  | 1.69404400  | -1.34629300 | 3.97156100  |
| H  | 0  | 2.96780000  | -0.32580400 | 2.09898500  |
| H  | 0  | 2.10220600  | -0.46373400 | -0.21169000 |

D) **PC**

E= -8828.082478 Ha

G= -8827.662003 Ha

|   |    |            |            |            |
|---|----|------------|------------|------------|
| C | -1 | 1.99959200 | 5.17031300 | 5.16897500 |
| H | -1 | 2.57070100 | 5.88998300 | 5.75631500 |
| C | -1 | 2.92003200 | 4.54386600 | 4.14023000 |

|   |    |             |             |             |
|---|----|-------------|-------------|-------------|
| O | -1 | 4.02606000  | 4.12635100  | 4.42185500  |
| H | -1 | 1.12996000  | 5.66452700  | 4.73187800  |
| H | -1 | 1.65631900  | 4.38910700  | 5.85145800  |
| N | -1 | 2.41706700  | 4.50058900  | 2.85435400  |
| H | -1 | 1.42957300  | 4.69012800  | 2.74494300  |
| C | -1 | 3.03625500  | 3.80116800  | 1.84074500  |
| H | -1 | 4.08305900  | 3.68398600  | 2.14292800  |
| C | 0  | 2.46746800  | 2.40283500  | 1.55755000  |
| H | 0  | 2.98880000  | 2.00213700  | 0.68456900  |
| H | 0  | 2.70705300  | 1.75841300  | 2.40899900  |
| C | 0  | 0.99028100  | 2.39907300  | 1.33624400  |
| N | 0  | 0.22843600  | 1.26891400  | 1.54173500  |
| H | 0  | 0.57999200  | 0.35904900  | 1.81065700  |
| C | 0  | -1.07207900 | 1.57388200  | 1.27248400  |
| H | 0  | -1.84825900 | 0.82896200  | 1.33719100  |
| N | 0  | -1.19659400 | 2.83486900  | 0.91334400  |
| C | 0  | 0.08308000  | 3.35895600  | 0.94573700  |
| H | 0  | 0.27412700  | 4.38429900  | 0.66789800  |
| C | -1 | 3.09425300  | 4.65730100  | 0.52263900  |
| O | -1 | 3.15460100  | 4.13302100  | -0.57666100 |
| N | -1 | 3.10510400  | 5.99800400  | 0.72564900  |
| H | -1 | 3.06064700  | 6.32381000  | 1.67768900  |
| C | -1 | 3.22986600  | 6.95162100  | -0.36112400 |
| H | -1 | 3.24368900  | 6.38690800  | -1.29172600 |
| H | -1 | 2.38373900  | 7.64395600  | -0.37392700 |
| H | -1 | 4.15747900  | 7.52534700  | -0.27861100 |
| C | -1 | 11.10572400 | 2.16889200  | -3.25492500 |
| H | -1 | 12.04992800 | 2.70143600  | -3.14189600 |
| C | -1 | 10.91973400 | 1.24997600  | -2.06173700 |
| O | -1 | 11.17358600 | 1.60033600  | -0.92562400 |
| H | -1 | 11.09309500 | 1.64568200  | -4.21312300 |
| H | -1 | 10.30431500 | 2.91207700  | -3.24960100 |
| N | -1 | 10.45824700 | -0.01264600 | -2.36355100 |
| H | -1 | 10.09247800 | -0.16914400 | -3.29173400 |
| C | -1 | 9.96938200  | -0.92941000 | -1.29985800 |
| H | -1 | 10.31448300 | -0.48258400 | -0.36343800 |

|   |    |             |             |             |
|---|----|-------------|-------------|-------------|
| C | 0  | 8.44497500  | -1.05342000 | -1.29043500 |
| H | 0  | 8.09566800  | -1.39810200 | -2.26944200 |
| H | 0  | 8.18330700  | -1.82784100 | -0.56831300 |
| C | 0  | 7.77252000  | 0.27031500  | -0.93359300 |
| H | 0  | 8.10825700  | 0.62545500  | 0.04447300  |
| H | 0  | 8.02808000  | 1.04288900  | -1.66253000 |
| S | 0  | 5.94602400  | 0.23175900  | -0.93725500 |
| C | 0  | 5.62201500  | -0.83368900 | 0.50191800  |
| H | 0  | 4.54487600  | -0.81382600 | 0.66826100  |
| H | 0  | 5.93545700  | -1.86284800 | 0.32197700  |
| H | 0  | 6.12222700  | -0.44199000 | 1.39028300  |
| C | -1 | 10.67249800 | -2.31077200 | -1.42319000 |
| O | -1 | 10.18145700 | -3.30856400 | -0.92022200 |
| N | -1 | 11.85521300 | -2.30100700 | -2.08597000 |
| H | -1 | 12.17576700 | -1.41484900 | -2.44184800 |
| C | -1 | 12.69055900 | -3.48142000 | -2.20646200 |
| H | -1 | 12.13809100 | -4.31928500 | -1.78468500 |
| H | -1 | 12.91955500 | -3.69237100 | -3.25447900 |
| H | -1 | 13.62833100 | -3.36094000 | -1.65608300 |
| C | -1 | -8.01968400 | 1.56867700  | -3.60254100 |
| H | -1 | -8.92861700 | 2.06155800  | -3.95136100 |
| C | -1 | -7.65610000 | 2.12469600  | -2.24254600 |
| O | -1 | -8.44657900 | 2.09663700  | -1.30255300 |
| H | -1 | -7.23228400 | 1.68894400  | -4.34813200 |
| H | -1 | -8.24454300 | 0.50634100  | -3.48878400 |
| N | -1 | -6.40971300 | 2.64374500  | -2.12341300 |
| H | -1 | -5.79029000 | 2.63502300  | -2.91873800 |
| C | -1 | -5.84635400 | 3.05931000  | -0.84071400 |
| H | -1 | -6.19723200 | 2.33131100  | -0.10241600 |
| C | 0  | -4.29325300 | 3.05246000  | -0.93383100 |
| H | 0  | -3.96181900 | 4.07761300  | -1.10482300 |
| H | 0  | -3.83167500 | 2.74536600  | 0.00187700  |
| S | 0  | -3.50438900 | 2.14340300  | -2.31069900 |
| H | 0  | -1.33839700 | -1.63089200 | 0.09236500  |
| C | -1 | -6.25913500 | 4.45819800  | -0.32551400 |
| O | -1 | -5.44002400 | 5.34266000  | -0.13135500 |



|    |    |             |             |             |
|----|----|-------------|-------------|-------------|
| N  | -1 | -7.58681600 | 4.56815100  | -0.08606700 |
| H  | -1 | -8.16473400 | 3.75831800  | -0.29534000 |
| C  | -1 | -8.19325300 | 5.79598900  | 0.39297000  |
| H  | -1 | -8.68022400 | 5.64169700  | 1.36023400  |
| H  | -1 | -7.40465300 | 6.53782800  | 0.50688900  |
| H  | -1 | -8.93677300 | 6.16870800  | -0.31753000 |
| C  | -1 | -4.70555300 | 0.19695100  | 2.01624700  |
| H  | -1 | -4.55879300 | 0.93785700  | 1.22751500  |
| C  | -1 | -3.92986200 | -1.03972200 | 1.61620800  |
| O  | -1 | -2.70695500 | -1.02902300 | 1.50100700  |
| H  | -1 | -5.77390700 | 0.01741800  | 2.14347500  |
| H  | -1 | -4.29146400 | 0.59353400  | 2.94386600  |
| N  | -1 | -4.66738700 | -2.14833000 | 1.38702200  |
| H  | -1 | -5.66451300 | -2.13659600 | 1.55239200  |
| C  | -1 | -4.11215000 | -3.40439800 | 0.99332800  |
| H  | -1 | -3.40036200 | -3.21108100 | 0.18538400  |
| C  | 0  | -3.32273900 | -4.04551800 | 2.17620300  |
| H  | 0  | -2.91318900 | -3.23204700 | 2.77441300  |
| H  | 0  | -4.02152700 | -4.59726000 | 2.81241200  |
| C  | 0  | -2.16972600 | -4.93303400 | 1.72382400  |
| H  | 0  | -2.51705800 | -5.77217500 | 1.11761800  |
| H  | 0  | -1.46246400 | -4.34669200 | 1.13237700  |
| S  | 0  | -1.26805500 | -5.58409100 | 3.17917500  |
| C  | 0  | 0.33287000  | -5.95125700 | 2.39790700  |
| H  | 0  | 0.22621900  | -6.71285700 | 1.62264400  |
| H  | 0  | 0.76632800  | -5.04460900 | 1.97532200  |
| H  | 0  | 0.99331500  | -6.33157700 | 3.17866800  |
| C  | -1 | -5.17704700 | -4.42473600 | 0.50480200  |
| O  | -1 | -6.30265900 | -4.43670200 | 0.97810600  |
| N  | -1 | -4.72019200 | -5.29332900 | -0.42877600 |
| H  | -1 | -3.81580400 | -5.11392200 | -0.83831900 |
| C  | -1 | -5.54286800 | -6.36126500 | -0.96918100 |
| H  | -1 | -6.47924700 | -6.36892500 | -0.41445500 |
| H  | -1 | -5.76085700 | -6.19486300 | -2.02809900 |
| H  | -1 | -5.04797400 | -7.32897500 | -0.85525700 |
| Se | 0  | -3.18740400 | 0.07657800  | -1.58773300 |

|    |   |             |             |             |
|----|---|-------------|-------------|-------------|
| Se | 0 | -0.11757400 | -2.06884700 | -0.60739100 |
| C  | 0 | -4.80200800 | -0.89644900 | -2.01979100 |
| C  | 0 | -5.99757000 | -0.64684200 | -1.34282900 |
| C  | 0 | -7.11106000 | -1.44530400 | -1.58162800 |
| C  | 0 | -7.02746400 | -2.51408600 | -2.47469400 |
| C  | 0 | -5.83214100 | -2.77008500 | -3.14243700 |
| C  | 0 | -4.72017900 | -1.95636400 | -2.92561100 |
| C  | 0 | 0.88302200  | -2.34051500 | 1.01439800  |
| C  | 0 | 0.29353300  | -2.18084600 | 2.27266100  |
| C  | 0 | 1.05554200  | -2.38611100 | 3.42192100  |
| C  | 0 | 2.39613700  | -2.75213700 | 3.32864800  |
| C  | 0 | 2.97828200  | -2.91056400 | 2.07120900  |
| C  | 0 | 2.22973200  | -2.70368400 | 0.91532300  |
| H  | 0 | -6.05455600 | 0.15664500  | -0.62267300 |
| H  | 0 | -8.03801400 | -1.24179600 | -1.05852500 |
| H  | 0 | -7.89107000 | -3.14620000 | -2.64463500 |
| H  | 0 | -5.76462300 | -3.59651500 | -3.84074800 |
| H  | 0 | -3.79342100 | -2.14379700 | -3.45477200 |
| H  | 0 | -0.75087600 | -1.90824800 | 2.35250200  |
| H  | 0 | 0.58848800  | -2.26953800 | 4.39313600  |
| H  | 0 | 2.98212500  | -2.91504400 | 4.22541900  |
| H  | 0 | 4.02130400  | -3.19335300 | 1.98674700  |
| H  | 0 | 2.69213100  | -2.82307600 | -0.05795000 |

**Table S13:** Cluster 2 at 46.2 ns; Optimized coordinates at SMD(water)-D3BJ-B3LYP/6-311G(d,p),ccPVTZ. Constrained atoms (*first column = -1*):

1,2,3,4,5,6,7,8,9,10,22,23,24,25,26,27,28,29,30,31,32,33,34,35,36,37,38,39,51,52,53,54,55,56,57,58,59,60,61,62,63,64,65,66,67,68,74,75,76,77,78,79,80,  
81,82,83,84,85,86,87,88,89,90,91,103,104,105,106,107,108,109,110

A) **RC**

E= -8828.0042300 Ha

G= -8827.5834940 Ha

|   |    |              |             |             |
|---|----|--------------|-------------|-------------|
| H | -1 | 1.07545100   | 2.12946500  | -6.67512000 |
| C | -1 | 0.03218300   | 2.31831300  | -6.92796800 |
| H | -1 | 0.02140800   | 3.34866000  | -7.28535600 |
| H | -1 | -0.29338600  | 1.63851800  | -7.71539600 |
| C | -1 | -0.97993900  | 2.14241900  | -5.80487400 |
| O | -1 | -1.93174900  | 2.94503800  | -5.68497000 |
| N | -1 | -0.79447700  | 1.24943800  | -4.85207400 |
| H | -1 | -0.03258200  | 0.59797800  | -4.97436900 |
| C | -1 | -1.73821300  | 1.04641800  | -3.80776500 |
| H | -1 | -2.74445400  | 0.90958200  | -4.20445400 |
| C | 0  | -1.40389500  | -0.20116900 | -2.96637200 |
| H | 0  | -2.20221900  | -0.30700400 | -2.23173100 |
| H | 0  | -1.44723700  | -1.07322700 | -3.62338000 |
| C | 0  | -0.09115200  | -0.16059000 | -2.25770800 |
| N | 0  | 1.07829400   | -0.67978100 | -2.78652000 |
| H | 0  | 1.16863900   | -1.13254500 | -3.68638100 |
| C | 0  | 2.07189200   | -0.49381100 | -1.87976000 |
| H | 0  | 3.07886100   | -0.83977000 | -2.03908900 |
| N | 0  | 1.61718900   | 0.10988300  | -0.79595600 |
| C | 0  | 0.26920300   | 0.32726600  | -1.02644000 |
| H | 0  | -0.36402000  | 0.80686600  | -0.29840400 |
| C | -1 | -1.98346800  | 2.25230000  | -2.93026100 |
| O | -1 | -3.02968900  | 2.28483000  | -2.27664800 |
| N | -1 | -1.14341500  | 3.29999700  | -2.95962300 |
| H | -1 | -0.33060800  | 3.13308800  | -3.53494900 |
| C | -1 | -1.28843700  | 4.62920500  | -2.31368500 |
| H | -1 | -1.07805100  | 4.58007600  | -1.24560200 |
| H | -1 | -0.52420200  | 5.31233600  | -2.68414200 |
| H | -1 | -2.22265300  | 5.12581800  | -2.57568500 |
| H | -1 | -11.29180700 | 1.96890900  | 0.51883800  |
| C | -1 | -11.19828400 | 1.64200400  | -0.51677500 |
| H | -1 | -12.16435900 | 1.72072700  | -1.01356700 |
| H | -1 | -10.59391700 | 2.37359500  | -1.05298700 |
| C | -1 | -10.77303000 | 0.14848500  | -0.68113900 |
| O | -1 | -10.98705100 | -0.50780300 | -1.68024300 |
| N | -1 | -10.02829100 | -0.30911800 | 0.39539100  |

|   |    |              |             |             |
|---|----|--------------|-------------|-------------|
| H | -1 | -9.77864700  | 0.12524600  | 1.27314100  |
| C | -1 | -9.59563900  | -1.74873600 | 0.26603500  |
| H | -1 | -9.01908500  | -2.01671100 | -0.61955300 |
| C | 0  | -8.62866000  | -2.05101300 | 1.43427400  |
| H | 0  | -9.05607200  | -1.68517300 | 2.37276000  |
| H | 0  | -8.51865300  | -3.13305400 | 1.52226800  |
| C | 0  | -7.25570300  | -1.42809600 | 1.17518500  |
| H | 0  | -6.80747900  | -1.88355600 | 0.28929000  |
| H | 0  | -7.32968900  | -0.35457100 | 0.98868900  |
| S | 0  | -6.04855300  | -1.66784600 | 2.52412800  |
| C | 0  | -6.54421500  | -0.31173100 | 3.63130800  |
| H | 0  | -6.41583800  | 0.65037500  | 3.13257900  |
| H | 0  | -7.57842400  | -0.42924400 | 3.95737900  |
| H | 0  | -5.89045000  | -0.35183400 | 4.50358800  |
| C | -1 | -10.74589100 | -2.82886100 | 0.28026400  |
| O | -1 | -10.58633600 | -4.02143900 | -0.04410700 |
| N | -1 | -12.02084600 | -2.43146000 | 0.52560600  |
| H | -1 | -12.30519000 | -1.47744400 | 0.69674200  |
| C | -1 | -13.24235700 | -3.28487300 | 0.39785600  |
| H | -1 | -12.97413100 | -4.31388000 | 0.63776300  |
| H | -1 | -13.89681100 | -2.92301600 | 1.19085000  |
| H | -1 | -13.65756300 | -3.25622500 | -0.60957000 |
| H | -1 | 7.26842100   | 1.36912600  | 4.30733600  |
| C | -1 | 8.22905500   | 1.62649000  | 3.86127300  |
| H | -1 | 8.50753000   | 2.63284000  | 4.17144900  |
| H | -1 | 8.92147500   | 0.82974600  | 4.13301100  |
| C | -1 | 8.16123200   | 1.59740700  | 2.32566100  |
| O | -1 | 9.17091500   | 1.62589900  | 1.70293100  |
| N | -1 | 7.00431600   | 1.51197100  | 1.72155200  |
| H | -1 | 6.25524700   | 1.45544500  | 2.39668500  |
| C | -1 | 6.83834900   | 1.27660000  | 0.30935400  |
| H | -1 | 7.42925100   | 0.37938800  | 0.12507900  |
| C | 0  | 5.35053900   | 1.01216700  | -0.02930100 |
| H | 0  | 4.84707200   | 1.95526200  | -0.23187600 |
| H | 0  | 5.30580100   | 0.38703000  | -0.91957600 |
| S | 0  | 4.42346400   | 0.18770700  | 1.33225700  |

|   |    |            |             |             |
|---|----|------------|-------------|-------------|
| H | 0  | 3.25050800 | 0.15022900  | 0.64923200  |
| C | -1 | 7.27253600 | 2.47969300  | -0.53247500 |
| O | -1 | 7.07323800 | 3.66449500  | -0.12847900 |
| N | -1 | 7.95737700 | 2.22864800  | -1.64408400 |
| H | -1 | 8.15303000 | 1.25568200  | -1.82823300 |
| C | -1 | 8.74656800 | 3.20221900  | -2.34022600 |
| H | -1 | 8.80948600 | 3.08525300  | -3.42156300 |
| H | -1 | 8.20770300 | 4.15043900  | -2.34519700 |
| H | -1 | 9.77354700 | 3.41581200  | -2.04405500 |
| H | -1 | 6.70721200 | -2.66714300 | -2.73997700 |
| C | -1 | 5.62388500 | -2.58850200 | -2.64822100 |
| H | -1 | 5.32229400 | -1.54274500 | -2.72497400 |
| H | -1 | 5.07166900 | -3.03044000 | -3.47766500 |
| C | -1 | 5.01567700 | -3.09882500 | -1.30802000 |
| O | -1 | 4.27238500 | -2.39542300 | -0.72949900 |
| N | -1 | 5.33604200 | -4.28098000 | -0.77955300 |
| H | -1 | 6.07187500 | -4.83577800 | -1.19320300 |
| C | -1 | 4.70895800 | -4.78655100 | 0.45245800  |
| H | -1 | 4.55284200 | -3.94713000 | 1.12947700  |
| C | 0  | 3.29183300 | -5.34406000 | 0.15928100  |
| H | 0  | 2.77539200 | -5.46470800 | 1.11676000  |
| H | 0  | 2.74045300 | -4.58052600 | -0.39176200 |
| C | 0  | 3.20858700 | -6.68656200 | -0.56654900 |
| H | 0  | 3.77416200 | -7.45700900 | -0.03828400 |
| H | 0  | 2.16424700 | -7.00724100 | -0.58729300 |
| S | 0  | 3.83805300 | -6.75426400 | -2.28653300 |
| C | 0  | 2.80470600 | -5.48228800 | -3.07302900 |
| H | 0  | 1.74519300 | -5.69977600 | -2.92397500 |
| H | 0  | 3.03198000 | -4.48688300 | -2.69149700 |
| H | 0  | 3.02573200 | -5.51002800 | -4.14089400 |
| C | -1 | 5.46928600 | -5.78736100 | 1.29038100  |
| O | -1 | 6.27073900 | -6.49107700 | 0.64721300  |
| N | -1 | 5.26118300 | -5.79248100 | 2.56816300  |
| H | -1 | 4.72782800 | -5.05117800 | 3.00114100  |
| C | -1 | 5.79562000 | -6.86908900 | 3.37536200  |
| H | -1 | 6.73567300 | -7.18600800 | 2.92328600  |

|    |    |             |             |             |
|----|----|-------------|-------------|-------------|
| H  | -1 | 5.98810400  | -6.51307400 | 4.38744300  |
| H  | -1 | 5.09301700  | -7.70151900 | 3.41513900  |
| Se | 0  | 0.51702200  | 3.13189100  | 3.27561700  |
| Se | 0  | -0.66298300 | 1.24782400  | 2.55244700  |
| C  | 0  | 1.64634600  | 3.52313500  | 1.75124100  |
| C  | 0  | 2.97081200  | 3.88051100  | 2.01200100  |
| C  | 0  | 3.81369000  | 4.22397700  | 0.95725300  |
| C  | 0  | 3.34323100  | 4.19502900  | -0.35456500 |
| C  | 0  | 2.02181800  | 3.82783100  | -0.60915500 |
| C  | 0  | 1.16800400  | 3.49770000  | 0.44118600  |
| C  | 0  | -2.26969600 | 1.98614700  | 1.75145600  |
| C  | 0  | -3.31519500 | 1.08371000  | 1.53460600  |
| C  | 0  | -4.49604100 | 1.52441500  | 0.94106300  |
| C  | 0  | -4.64317800 | 2.86095600  | 0.57314900  |
| C  | 0  | -3.59537500 | 3.75331200  | 0.79014100  |
| C  | 0  | -2.40638500 | 3.32085700  | 1.37547100  |
| H  | 0  | 3.34674200  | 3.87736100  | 3.02805300  |
| H  | 0  | 4.84703300  | 4.47677300  | 1.15806400  |
| H  | 0  | 4.00873700  | 4.44341800  | -1.17274400 |
| H  | 0  | 1.65025000  | 3.79400100  | -1.62668600 |
| H  | 0  | 0.14744300  | 3.20398900  | 0.23827900  |
| H  | 0  | -3.21903200 | 0.04579200  | 1.83260400  |
| H  | 0  | -5.30052200 | 0.81803800  | 0.77629100  |
| H  | 0  | -5.56205800 | 3.20094500  | 0.11111900  |
| H  | 0  | -3.69483300 | 4.79171500  | 0.49643800  |
| H  | 0  | -1.59878900 | 4.02140300  | 1.54490500  |

B) **TS1 (proton transfer Cys145-His41) img= -1202.5167 cm<sup>-1</sup>**

E= -8827.995869 Ha

G= -8827.575083 Ha

|   |              |              |             |
|---|--------------|--------------|-------------|
| H | 1.008936000  | -2.307137000 | 6.093371000 |
| C | -0.017107000 | -2.580313000 | 6.339571000 |
| H | 0.037549000  | -3.639034000 | 6.595653000 |
| H | -0.366917000 | -1.999480000 | 7.193049000 |
| C | -1.057612000 | -2.357237000 | 5.251337000 |

|   |               |              |              |
|---|---------------|--------------|--------------|
| O | -1.963873000  | -3.199183000 | 5.066008000  |
| N | -0.940740000  | -1.367617000 | 4.387287000  |
| H | -0.215251000  | -0.687334000 | 4.562581000  |
| C | -1.912907000  | -1.121305000 | 3.378939000  |
| H | -2.918181000  | -1.082333000 | 3.799644000  |
| C | -1.555052000  | 0.171987000  | 2.603438000  |
| H | -2.302541000  | 0.304598000  | 1.822183000  |
| H | -1.630961000  | 1.022789000  | 3.283940000  |
| C | -0.184742000  | 0.148370000  | 1.984571000  |
| N | 0.931827000   | 0.687825000  | 2.612327000  |
| H | 0.932071000   | 1.160664000  | 3.508080000  |
| C | 2.014060000   | 0.493765000  | 1.835963000  |
| H | 3.008432000   | 0.812041000  | 2.093130000  |
| N | 1.654576000   | -0.131380000 | 0.725967000  |
| C | 0.291449000   | -0.363537000 | 0.803926000  |
| H | -0.246815000  | -0.870369000 | 0.022872000  |
| C | -2.104581000  | -2.249679000 | 2.392174000  |
| O | -3.158692000  | -2.280723000 | 1.751354000  |
| N | -1.205571000  | -3.244164000 | 2.309587000  |
| H | -0.393361000  | -3.085778000 | 2.888340000  |
| C | -1.285293000  | -4.512069000 | 1.539851000  |
| H | -1.097889000  | -4.347458000 | 0.479106000  |
| H | -0.476976000  | -5.180878000 | 1.833058000  |
| H | -2.185117000  | -5.084877000 | 1.764054000  |
| H | -11.474099000 | -2.183937000 | -0.898522000 |
| C | -11.380915000 | -1.952946000 | 0.162641000  |
| H | -12.331841000 | -2.135559000 | 0.661332000  |
| H | -10.726133000 | -2.695831000 | 0.618042000  |
| C | -11.039024000 | -0.459691000 | 0.465552000  |
| O | -11.272344000 | 0.084031000  | 1.526051000  |
| N | -10.341138000 | 0.142011000  | -0.570711000 |
| H | -10.082758000 | -0.190753000 | -1.489385000 |
| C | -9.989300000  | 1.585474000  | -0.307958000 |
| H | -9.413360000  | 1.800695000  | 0.592269000  |
| C | -9.083919000  | 2.064597000  | -1.465049000 |
| H | -9.568916000  | 1.841484000  | -2.420013000 |

|   |               |              |              |
|---|---------------|--------------|--------------|
| H | -8.981301000  | 3.148553000  | -1.393226000 |
| C | -7.699044000  | 1.422004000  | -1.392665000 |
| H | -7.198869000  | 1.719273000  | -0.467960000 |
| H | -7.758385000  | 0.331619000  | -1.398191000 |
| S | -6.570569000  | 1.919419000  | -2.739888000 |
| C | -7.288457000  | 0.974056000  | -4.120445000 |
| H | -7.282226000  | -0.093269000 | -3.892686000 |
| H | -8.305008000  | 1.302014000  | -4.339415000 |
| H | -6.661635000  | 1.156657000  | -4.994251000 |
| C | -11.199679000 | 2.592558000  | -0.203378000 |
| O | -11.102890000 | 3.755845000  | 0.232886000  |
| N | -12.453960000 | 2.146346000  | -0.470358000 |
| H | -12.686220000 | 1.198095000  | -0.729512000 |
| C | -13.719859000 | 2.910346000  | -0.245568000 |
| H | -13.515347000 | 3.971588000  | -0.388028000 |
| H | -14.366615000 | 2.588409000  | -1.061750000 |
| H | -14.114630000 | 2.760865000  | 0.759388000  |
| H | 6.950467000   | -0.134492000 | -4.839294000 |
| C | 7.932100000   | -0.376588000 | -4.432093000 |
| H | 8.262153000   | -1.330447000 | -4.841627000 |
| H | 8.572774000   | 0.481832000  | -4.633934000 |
| C | 7.890241000   | -0.498960000 | -2.900160000 |
| O | 8.910892000   | -0.527704000 | -2.295585000 |
| N | 6.741352000   | -0.539952000 | -2.276425000 |
| H | 5.978287000   | -0.463045000 | -2.933647000 |
| C | 6.587502000   | -0.451332000 | -0.846192000 |
| H | 7.129233000   | 0.457270000  | -0.583176000 |
| C | 5.136637000   | -0.070963000 | -0.445966000 |
| H | 5.092544000   | -0.110372000 | 0.644694000  |
| H | 5.003579000   | 0.972936000  | -0.731416000 |
| S | 3.762828000   | -1.064406000 | -1.155816000 |
| H | 2.544778000   | -0.542846000 | -0.133316000 |
| C | 7.104891000   | -1.701977000 | -0.130114000 |
| O | 6.966563000   | -2.852229000 | -0.644431000 |
| N | 7.794005000   | -1.518939000 | 0.992057000  |
| H | 7.936894000   | -0.558317000 | 1.267091000  |



|    |             |              |              |
|----|-------------|--------------|--------------|
| C  | 8.650014000 | -2.506752000 | 1.580920000  |
| H  | 8.725491000 | -2.490551000 | 2.667644000  |
| H  | 8.166516000 | -3.481081000 | 1.500715000  |
| H  | 9.682070000 | -2.630265000 | 1.252849000  |
| H  | 6.285349000 | 3.167250000  | 2.571954000  |
| C  | 5.206860000 | 3.034283000  | 2.486193000  |
| H  | 4.966940000 | 1.970122000  | 2.465596000  |
| H  | 4.645193000 | 3.361418000  | 3.361477000  |
| C  | 4.546532000 | 3.634141000  | 1.209471000  |
| O  | 3.834386000 | 2.947112000  | 0.574725000  |
| N  | 4.789110000 | 4.878349000  | 0.794003000  |
| H  | 5.499240000 | 5.433176000  | 1.250337000  |
| C  | 4.112119000 | 5.462059000  | -0.375465000 |
| H  | 3.992235000 | 4.683730000  | -1.128588000 |
| C  | 2.671434000 | 5.906803000  | -0.011982000 |
| H  | 2.130245000 | 6.081466000  | -0.947141000 |
| H  | 2.175347000 | 5.066839000  | 0.477026000  |
| C  | 2.527789000 | 7.172780000  | 0.832124000  |
| H  | 3.029297000 | 8.020434000  | 0.360385000  |
| H  | 1.466871000 | 7.423629000  | 0.906439000  |
| S  | 3.204716000 | 7.128407000  | 2.534320000  |
| C  | 2.274388000 | 5.730203000  | 3.229656000  |
| H  | 1.199456000 | 5.897851000  | 3.137751000  |
| H  | 2.542156000 | 4.790672000  | 2.746214000  |
| H  | 2.535248000 | 5.670314000  | 4.287170000  |
| C  | 4.798753000 | 6.581544000  | -1.121875000 |
| O  | 5.569981000 | 7.266175000  | -0.423523000 |
| N  | 4.567844000 | 6.696969000  | -2.390504000 |
| H  | 4.070149000 | 5.970575000  | -2.886607000 |
| C  | 5.025198000 | 7.875559000  | -3.096217000 |
| H  | 5.953504000 | 8.202317000  | -2.627190000 |
| H  | 5.219596000 | 7.630183000  | -4.140297000 |
| H  | 4.275474000 | 8.665257000  | -3.046581000 |
| Se | 1.433598000 | -4.849399000 | -1.720292000 |
| Se | 0.858280000 | -2.760181000 | -2.629319000 |
| C  | 2.347098000 | -4.336012000 | -0.092610000 |

|   |              |              |              |
|---|--------------|--------------|--------------|
| C | 3.605254000  | -4.884551000 | 0.159825000  |
| C | 4.272512000  | -4.559079000 | 1.340306000  |
| C | 3.688761000  | -3.688839000 | 2.260451000  |
| C | 2.434549000  | -3.138957000 | 1.995499000  |
| C | 1.763933000  | -3.462254000 | 0.820499000  |
| C | -1.006964000 | -2.522112000 | -2.158314000 |
| C | -1.472802000 | -1.203648000 | -2.150852000 |
| C | -2.812600000 | -0.943846000 | -1.867994000 |
| C | -3.685664000 | -1.991653000 | -1.582165000 |
| C | -3.214629000 | -3.303503000 | -1.593336000 |
| C | -1.880777000 | -3.574544000 | -1.892282000 |
| H | 4.070333000  | -5.542249000 | -0.564367000 |
| H | 5.254282000  | -4.976062000 | 1.531264000  |
| H | 4.213987000  | -3.432104000 | 3.172886000  |
| H | 1.978134000  | -2.450482000 | 2.697460000  |
| H | 0.802867000  | -3.021318000 | 0.605723000  |
| H | -0.792485000 | -0.383888000 | -2.352069000 |
| H | -3.168102000 | 0.080040000  | -1.858819000 |
| H | -4.722522000 | -1.786107000 | -1.345230000 |
| H | -3.886025000 | -4.123639000 | -1.367500000 |
| H | -1.522843000 | -4.596181000 | -1.905984000 |

C) **Ion-pair (Zwit)**

E= -8828.0005060 Ha

G= -8827.5734140 Ha

|   |              |              |             |
|---|--------------|--------------|-------------|
| H | 0.917259000  | -2.586109000 | 6.166408000 |
| C | -0.116830000 | -2.838889000 | 6.400430000 |
| H | -0.087079000 | -3.899778000 | 6.651598000 |
| H | -0.463408000 | -2.255065000 | 7.253186000 |
| C | -1.140858000 | -2.588630000 | 5.302521000 |
| O | -2.062546000 | -3.410430000 | 5.103361000 |
| N | -0.994142000 | -1.597423000 | 4.444867000 |
| H | -0.256456000 | -0.933402000 | 4.631265000 |
| C | -1.950209000 | -1.325763000 | 3.427675000 |
| H | -2.958842000 | -1.267767000 | 3.838020000 |

|   |               |              |              |
|---|---------------|--------------|--------------|
| C | -1.612319000  | -0.010264000 | 2.683742000  |
| H | -2.396288000  | 0.150415000  | 1.944878000  |
| H | -1.659910000  | 0.813306000  | 3.399610000  |
| C | -0.285882000  | 0.026790000  | 1.979357000  |
| N | 0.888665000   | 0.468007000  | 2.584338000  |
| H | 0.971226000   | 0.794736000  | 3.540105000  |
| C | 1.899238000   | 0.427314000  | 1.712740000  |
| H | 2.913571000   | 0.728462000  | 1.904826000  |
| N | 1.419341000   | -0.008736000 | 0.553500000  |
| C | 0.066857000   | -0.273600000 | 0.692414000  |
| H | -0.533940000  | -0.642258000 | -0.118498000 |
| C | -2.155026000  | -2.444969000 | 2.433140000  |
| O | -3.202715000  | -2.450698000 | 1.781159000  |
| N | -1.276224000  | -3.457696000 | 2.354840000  |
| H | -0.467044000  | -3.319268000 | 2.942882000  |
| C | -1.374339000  | -4.719825000 | 1.577772000  |
| H | -1.172312000  | -4.553943000 | 0.519913000  |
| H | -0.583359000  | -5.406905000 | 1.875972000  |
| H | -2.288288000  | -5.274710000 | 1.789573000  |
| H | -11.485759000 | -2.166184000 | -0.955159000 |
| C | -11.398992000 | -1.942451000 | 0.108102000  |
| H | -12.358760000 | -2.107516000 | 0.595852000  |
| H | -10.764773000 | -2.701167000 | 0.566494000  |
| C | -11.029118000 | -0.458222000 | 0.422288000  |
| O | -11.262207000 | 0.085029000  | 1.483079000  |
| N | -10.307852000 | 0.133806000  | -0.603484000 |
| H | -10.046792000 | -0.199764000 | -1.521107000 |
| C | -9.928652000  | 1.568244000  | -0.329606000 |
| H | -9.357889000  | 1.766867000  | 0.577706000  |
| C | -8.971544000  | 2.019903000  | -1.458629000 |
| H | -9.368998000  | 1.709318000  | -2.429644000 |
| H | -8.920827000  | 3.109907000  | -1.458038000 |
| C | -7.568541000  | 1.452725000  | -1.228359000 |
| H | -7.141308000  | 1.890758000  | -0.323622000 |
| H | -7.591042000  | 0.370106000  | -1.087763000 |
| S | -6.375755000  | 1.800361000  | -2.567397000 |

|   |               |              |              |
|---|---------------|--------------|--------------|
| C | -6.765693000  | 0.426507000  | -3.695986000 |
| H | -6.560354000  | -0.530647000 | -3.213581000 |
| H | -7.807538000  | 0.467626000  | -4.016571000 |
| H | -6.120871000  | 0.532317000  | -4.569330000 |
| C | -11.118706000 | 2.599998000  | -0.232512000 |
| O | -11.002190000 | 3.758824000  | 0.210746000  |
| N | -12.379164000 | 2.181554000  | -0.514920000 |
| H | -12.628483000 | 1.239683000  | -0.781389000 |
| C | -13.631088000 | 2.970852000  | -0.299462000 |
| H | -13.402892000 | 4.028256000  | -0.434287000 |
| H | -14.275772000 | 2.666609000  | -1.124028000 |
| H | -14.039517000 | 2.824727000  | 0.700517000  |
| H | 7.018373000   | -0.484697000 | -4.692036000 |
| C | 7.990354000   | -0.749367000 | -4.275829000 |
| H | 8.304667000   | -1.707911000 | -4.686804000 |
| H | 8.650971000   | 0.096395000  | -4.466509000 |
| C | 7.929730000   | -0.878407000 | -2.745071000 |
| O | 8.943099000   | -0.931571000 | -2.129992000 |
| N | 6.773697000   | -0.898344000 | -2.133628000 |
| H | 6.019409000   | -0.802178000 | -2.798402000 |
| C | 6.606610000   | -0.813586000 | -0.704646000 |
| H | 7.164443000   | 0.082126000  | -0.431279000 |
| C | 5.086713000   | -0.626176000 | -0.303268000 |
| H | 4.756271000   | -1.544047000 | 0.183992000  |
| H | 5.063476000   | 0.162653000  | 0.449672000  |
| S | 3.875277000   | -0.243142000 | -1.636730000 |
| H | 2.046126000   | -0.164025000 | -0.277466000 |
| C | 7.090077000   | -2.078347000 | 0.010343000  |
| O | 6.933133000   | -3.222883000 | -0.511330000 |
| N | 7.770960000   | -1.915374000 | 1.140603000  |
| H | 7.931023000   | -0.959337000 | 1.422078000  |
| C | 8.599807000   | -2.923848000 | 1.733291000  |
| H | 8.664101000   | -2.914610000 | 2.820816000  |
| H | 8.096879000   | -3.887399000 | 1.642993000  |
| H | 9.632463000   | -3.067386000 | 1.415418000  |
| H | 6.344173000   | 2.793597000  | 2.728794000  |

|    |             |              |              |
|----|-------------|--------------|--------------|
| C  | 5.264103000 | 2.683736000  | 2.631052000  |
| H  | 5.002173000 | 1.624964000  | 2.602446000  |
| H  | 4.700180000 | 3.018264000  | 3.502082000  |
| C  | 4.630035000 | 3.303637000  | 1.350598000  |
| O  | 3.910410000 | 2.634864000  | 0.704885000  |
| N  | 4.903009000 | 4.544515000  | 0.944127000  |
| H  | 5.619737000 | 5.082041000  | 1.410736000  |
| C  | 4.250810000 | 5.148091000  | -0.229339000 |
| H  | 4.122624000 | 4.376185000  | -0.987687000 |
| C  | 2.815859000 | 5.620921000  | 0.120957000  |
| H  | 2.287908000 | 5.810198000  | -0.818952000 |
| H  | 2.297569000 | 4.789422000  | 0.601293000  |
| C  | 2.689211000 | 6.886196000  | 0.968752000  |
| H  | 3.212018000 | 7.725491000  | 0.505271000  |
| H  | 1.632854000 | 7.157959000  | 1.034118000  |
| S  | 3.348668000 | 6.821779000  | 2.677119000  |
| C  | 2.382556000 | 5.441116000  | 3.358564000  |
| H  | 1.312326000 | 5.629753000  | 3.253162000  |
| H  | 2.638346000 | 4.497089000  | 2.877350000  |
| H  | 2.628516000 | 5.374966000  | 4.419282000  |
| C  | 4.968607000 | 6.256585000  | -0.962720000 |
| O  | 5.746574000 | 6.921405000  | -0.252799000 |
| N  | 4.753606000 | 6.383106000  | -2.233086000 |
| H  | 4.246081000 | 5.669787000  | -2.738122000 |
| C  | 5.242994000 | 7.555306000  | -2.927870000 |
| H  | 6.172926000 | 7.860171000  | -2.447461000 |
| H  | 5.443247000 | 7.311067000  | -3.971110000 |
| H  | 4.509495000 | 8.360321000  | -2.882013000 |
| Se | 1.560096000 | -4.039339000 | -2.174748000 |
| Se | 0.662091000 | -1.922407000 | -2.632326000 |
| C  | 2.300815000 | -3.786754000 | -0.403271000 |
| C  | 3.611470000 | -4.208002000 | -0.171623000 |
| C  | 4.160684000 | -4.078104000 | 1.103605000  |
| C  | 3.419808000 | -3.499712000 | 2.131899000  |
| C  | 2.116890000 | -3.067064000 | 1.887542000  |
| C  | 1.548186000 | -3.227361000 | 0.626833000  |

|   |              |              |              |
|---|--------------|--------------|--------------|
| C | -1.228903000 | -2.088777000 | -2.220056000 |
| C | -1.972602000 | -0.908659000 | -2.335597000 |
| C | -3.333985000 | -0.914220000 | -2.037675000 |
| C | -3.956125000 | -2.089889000 | -1.618649000 |
| C | -3.209284000 | -3.261205000 | -1.507904000 |
| C | -1.848632000 | -3.266707000 | -1.812380000 |
| H | 4.206756000  | -4.613370000 | -0.980266000 |
| H | 5.179882000  | -4.399159000 | 1.278276000  |
| H | 3.857864000  | -3.377264000 | 3.115279000  |
| H | 1.542807000  | -2.604166000 | 2.681234000  |
| H | 0.535575000  | -2.901987000 | 0.440521000  |
| H | -1.491468000 | 0.011692000  | -2.648813000 |
| H | -3.908070000 | 0.001924000  | -2.127121000 |
| H | -5.011618000 | -2.088868000 | -1.374433000 |
| H | -3.681758000 | -4.178074000 | -1.175604000 |
| H | -1.273534000 | -4.179754000 | -1.725865000 |

D) **TCI**

E= -8828.007695 Ha

G= -8827.580764 Ha

|   |              |              |             |
|---|--------------|--------------|-------------|
| H | 0.675276000  | -2.968140000 | 5.505010000 |
| C | -0.327634000 | -3.346716000 | 5.702127000 |
| H | -0.193939000 | -4.422882000 | 5.818090000 |
| H | -0.720988000 | -2.910545000 | 6.620379000 |
| C | -1.380758000 | -3.060622000 | 4.641114000 |
| O | -2.221062000 | -3.935917000 | 4.337344000 |
| N | -1.337612000 | -1.960234000 | 3.915329000 |
| H | -0.665371000 | -1.256846000 | 4.185979000 |
| C | -2.324110000 | -1.656463000 | 2.937336000 |
| H | -3.330231000 | -1.747941000 | 3.348341000 |
| C | -2.121833000 | -0.226814000 | 2.386349000 |
| H | -2.910216000 | -0.041083000 | 1.658276000 |
| H | -2.250383000 | 0.483537000  | 3.205211000 |
| C | -0.795695000 | -0.000640000 | 1.730260000 |
| N | 0.322134000  | 0.485371000  | 2.403034000 |
| H | 0.347850000  | 0.758942000  | 3.379185000 |

|   |               |              |              |
|---|---------------|--------------|--------------|
| C | 1.364212000   | 0.559871000  | 1.573640000  |
| H | 2.348428000   | 0.916162000  | 1.819966000  |
| N | 0.954167000   | 0.140030000  | 0.380473000  |
| C | -0.381498000  | -0.211770000 | 0.446876000  |
| H | -0.922887000  | -0.569032000 | -0.409458000 |
| C | -2.429754000  | -2.656719000 | 1.809315000  |
| O | -3.477826000  | -2.681568000 | 1.158444000  |
| N | -1.458534000  | -3.562248000 | 1.607202000  |
| H | -0.661120000  | -3.421302000 | 2.210526000  |
| C | -1.441999000  | -4.720505000 | 0.677370000  |
| H | -1.266325000  | -4.404615000 | -0.350612000 |
| H | -0.586081000  | -5.360118000 | 0.889384000  |
| H | -2.296532000  | -5.383024000 | 0.814864000  |
| H | -11.774155000 | -2.855666000 | -1.546721000 |
| C | -11.699730000 | -2.759695000 | -0.463504000 |
| H | -12.634810000 | -3.076310000 | -0.003414000 |
| H | -10.991529000 | -3.505230000 | -0.102070000 |
| C | -11.471233000 | -1.297889000 | 0.035864000  |
| O | -11.745858000 | -0.916931000 | 1.155768000  |
| N | -10.819357000 | -0.515205000 | -0.905093000 |
| H | -10.535706000 | -0.704385000 | -1.856513000 |
| C | -10.577069000 | 0.903377000  | -0.451898000 |
| H | -10.019977000 | 1.040751000  | 0.474968000  |
| C | -9.731316000  | 1.608059000  | -1.536021000 |
| H | -10.225196000 | 1.493098000  | -2.505504000 |
| H | -9.704667000  | 2.674380000  | -1.305962000 |
| C | -8.302546000  | 1.072000000  | -1.590536000 |
| H | -7.796101000  | 1.257530000  | -0.640308000 |
| H | -8.279509000  | -0.004552000 | -1.771926000 |
| S | -7.262376000  | 1.871050000  | -2.862276000 |
| C | -7.991855000  | 1.153499000  | -4.368419000 |
| H | -7.944200000  | 0.063705000  | -4.330671000 |
| H | -9.024575000  | 1.475947000  | -4.503003000 |
| H | -7.397753000  | 1.507784000  | -5.211856000 |
| C | -11.859818000 | 1.795314000  | -0.229756000 |
| O | -11.851095000 | 2.895214000  | 0.355995000  |

|   |               |              |              |
|---|---------------|--------------|--------------|
| N | -13.076767000 | 1.296102000  | -0.566499000 |
| H | -13.236910000 | 0.375465000  | -0.949993000 |
| C | -14.396689000 | 1.927831000  | -0.257542000 |
| H | -14.272261000 | 3.010823000  | -0.257703000 |
| H | -15.016564000 | 1.668680000  | -1.115847000 |
| H | -14.780221000 | 1.618819000  | 0.714847000  |
| H | 6.448877000   | 1.056070000  | -4.983870000 |
| C | 7.445468000   | 0.836199000  | -4.601133000 |
| H | 7.846637000   | -0.028476000 | -5.128296000 |
| H | 8.020117000   | 1.758878000  | -4.681926000 |
| C | 7.411243000   | 0.511011000  | -3.098923000 |
| O | 8.430511000   | 0.479048000  | -2.492182000 |
| N | 6.267989000   | 0.303291000  | -2.498508000 |
| H | 5.502023000   | 0.408914000  | -3.148323000 |
| C | 6.106402000   | 0.191734000  | -1.070768000 |
| H | 6.578078000   | 1.095632000  | -0.685202000 |
| C | 4.599911000   | 0.341846000  | -0.656509000 |
| H | 4.393208000   | -0.307842000 | 0.195784000  |
| H | 4.440199000   | 1.367684000  | -0.328858000 |
| S | 3.321377000   | 0.045091000  | -1.933737000 |
| H | 1.572695000   | 0.087967000  | -0.447232000 |
| C | 6.715387000   | -1.100183000 | -0.518798000 |
| O | 6.664355000   | -2.180041000 | -1.180662000 |
| N | 7.387597000   | -1.015368000 | 0.625127000  |
| H | 7.457674000   | -0.091227000 | 1.025010000  |
| C | 8.314698000   | -2.005604000 | 1.089027000  |
| H | 8.387560000   | -2.126637000 | 2.169292000  |
| H | 7.905789000   | -2.994169000 | 0.876771000  |
| H | 9.353470000   | -2.007985000 | 0.758921000  |
| H | 5.529707000   | 3.297765000  | 2.787930000  |
| C | 4.464351000   | 3.097497000  | 2.673569000  |
| H | 4.304783000   | 2.030210000  | 2.511455000  |
| H | 3.878748000   | 3.264257000  | 3.578063000  |
| C | 3.762204000   | 3.809054000  | 1.479280000  |
| O | 3.104362000   | 3.160342000  | 0.752412000  |
| N | 3.911192000   | 5.111556000  | 1.232818000  |



|    |              |              |              |
|----|--------------|--------------|--------------|
| H  | 4.577170000  | 5.652876000  | 1.765549000  |
| C  | 3.193568000  | 5.791823000  | 0.142432000  |
| H  | 3.133268000  | 5.112356000  | -0.707303000 |
| C  | 1.723576000  | 6.075968000  | 0.547324000  |
| H  | 1.168551000  | 6.326176000  | -0.362188000 |
| H  | 1.295159000  | 5.144781000  | 0.921525000  |
| C  | 1.483912000  | 7.208925000  | 1.544764000  |
| H  | 1.922942000  | 8.144681000  | 1.192602000  |
| H  | 0.407088000  | 7.370169000  | 1.636914000  |
| S  | 2.155593000  | 6.995684000  | 3.236229000  |
| C  | 1.327583000  | 5.456236000  | 3.734789000  |
| H  | 0.243972000  | 5.553580000  | 3.643225000  |
| H  | 1.671340000  | 4.606970000  | 3.144258000  |
| H  | 1.580919000  | 5.284252000  | 4.781800000  |
| C  | 3.795044000  | 7.047481000  | -0.443562000 |
| O  | 4.511943000  | 7.689888000  | 0.346739000  |
| N  | 3.557507000  | 7.310968000  | -1.688638000 |
| H  | 3.116284000  | 6.621042000  | -2.280914000 |
| C  | 3.925870000  | 8.602683000  | -2.229062000 |
| H  | 4.826517000  | 8.933081000  | -1.711200000 |
| H  | 4.139276000  | 8.511609000  | -3.294081000 |
| H  | 3.118929000  | 9.321148000  | -2.084744000 |
| Se | 3.370008000  | -5.089237000 | -0.882957000 |
| Se | 3.357278000  | -2.412169000 | -1.761861000 |
| C  | 3.220569000  | -4.395020000 | 0.908476000  |
| C  | 4.151144000  | -3.465328000 | 1.396796000  |
| C  | 3.972348000  | -2.874327000 | 2.646096000  |
| C  | 2.870999000  | -3.207762000 | 3.436112000  |
| C  | 1.960433000  | -4.156359000 | 2.970997000  |
| C  | 2.135776000  | -4.746005000 | 1.720051000  |
| C  | 1.590303000  | -2.482381000 | -2.546552000 |
| C  | 1.435868000  | -2.299495000 | -3.922723000 |
| C  | 0.159047000  | -2.266168000 | -4.481976000 |
| C  | -0.964028000 | -2.414689000 | -3.670460000 |
| C  | -0.808379000 | -2.608098000 | -2.298105000 |
| C  | 0.466248000  | -2.648310000 | -1.735397000 |

|   |              |              |              |
|---|--------------|--------------|--------------|
| H | 5.005283000  | -3.193040000 | 0.789690000  |
| H | 4.696940000  | -2.148581000 | 2.999031000  |
| H | 2.729052000  | -2.741008000 | 4.403733000  |
| H | 1.106052000  | -4.438273000 | 3.575227000  |
| H | 1.420997000  | -5.476543000 | 1.365796000  |
| H | 2.308694000  | -2.176944000 | -4.551922000 |
| H | 0.044452000  | -2.121027000 | -5.549960000 |
| H | -1.956705000 | -2.379896000 | -4.103485000 |
| H | -1.680889000 | -2.712592000 | -1.663335000 |
| H | 0.588380000  | -2.798436000 | -0.670380000 |

E) **Pinhb**

E= -8828.011884 Ha

G= -8827.585001 Ha

|   |              |              |             |
|---|--------------|--------------|-------------|
| H | 0.584696000  | -3.806348000 | 5.304238000 |
| C | -0.435165000 | -4.150652000 | 5.475531000 |
| H | -0.350332000 | -5.236768000 | 5.526613000 |
| H | -0.813481000 | -3.753346000 | 6.417436000 |
| C | -1.468799000 | -3.754140000 | 4.430996000 |
| O | -2.345790000 | -4.570879000 | 4.072755000 |
| N | -1.372678000 | -2.615068000 | 3.773151000 |
| H | -0.671104000 | -1.960192000 | 4.087543000 |
| C | -2.339587000 | -2.209056000 | 2.812774000 |
| H | -3.350758000 | -2.279638000 | 3.214944000 |
| C | -2.156578000 | -0.736146000 | 2.392191000 |
| H | -2.822828000 | -0.559548000 | 1.546339000 |
| H | -2.510843000 | -0.110384000 | 3.213076000 |
| C | -0.774377000 | -0.284835000 | 2.041372000 |
| N | -0.144937000 | 0.715069000  | 2.775964000 |
| H | -0.531438000 | 1.160938000  | 3.600239000 |
| C | 1.029703000  | 1.024262000  | 2.231353000 |
| H | 1.716341000  | 1.771108000  | 2.579889000 |
| N | 1.184906000  | 0.243300000  | 1.164396000 |
| C | 0.086408000  | -0.582786000 | 1.023674000 |
| H | 0.015039000  | -1.301786000 | 0.231248000 |
| C | -2.483686000 | -3.133579000 | 1.626040000 |

|   |               |              |              |
|---|---------------|--------------|--------------|
| O | -3.528382000  | -3.072121000 | 0.972208000  |
| N | -1.552944000  | -4.068082000 | 1.372164000  |
| H | -0.753326000  | -3.999737000 | 1.984989000  |
| C | -1.583291000  | -5.167718000 | 0.374068000  |
| H | -1.387874000  | -4.798851000 | -0.632449000 |
| H | -0.757900000  | -5.856858000 | 0.549316000  |
| H | -2.467221000  | -5.798342000 | 0.469102000  |
| H | -11.809758000 | -2.709899000 | -1.759983000 |
| C | -11.736852000 | -2.682793000 | -0.672757000 |
| H | -12.687573000 | -2.984200000 | -0.235054000 |
| H | -11.064612000 | -3.479820000 | -0.355192000 |
| C | -11.445855000 | -1.265480000 | -0.085391000 |
| O | -11.709121000 | -0.940705000 | 1.054758000  |
| N | -10.754703000 | -0.457612000 | -0.975678000 |
| H | -10.474804000 | -0.601684000 | -1.936059000 |
| C | -10.451506000 | 0.918995000  | -0.436826000 |
| H | -9.893870000  | 0.974793000  | 0.497942000  |
| C | -9.563703000  | 1.647315000  | -1.470327000 |
| H | -10.053185000 | 1.618770000  | -2.448201000 |
| H | -9.486941000  | 2.694293000  | -1.172380000 |
| C | -8.162202000  | 1.045283000  | -1.548404000 |
| H | -7.664606000  | 1.129946000  | -0.579341000 |
| H | -8.188893000  | -0.013530000 | -1.814047000 |
| S | -7.059193000  | 1.887507000  | -2.736308000 |
| C | -7.790504000  | 1.326729000  | -4.306737000 |
| H | -7.798429000  | 0.236295000  | -4.353523000 |
| H | -8.802549000  | 1.711425000  | -4.434500000 |
| H | -7.160787000  | 1.713705000  | -5.108911000 |
| C | -11.694490000 | 1.852341000  | -0.164813000 |
| O | -11.639599000 | 2.913543000  | 0.486510000  |
| N | -12.930626000 | 1.429636000  | -0.534122000 |
| H | -13.129738000 | 0.541891000  | -0.972928000 |
| C | -14.222606000 | 2.100283000  | -0.190960000 |
| H | -14.049887000 | 3.174629000  | -0.125374000 |
| H | -14.848894000 | 1.921425000  | -1.064954000 |
| H | -14.624711000 | 1.750809000  | 0.759989000  |

|   |             |              |              |
|---|-------------|--------------|--------------|
| H | 6.587870000 | 0.578794000  | -4.907411000 |
| C | 7.571596000 | 0.291699000  | -4.536080000 |
| H | 7.936493000 | -0.556807000 | -5.113479000 |
| H | 8.187340000 | 1.190808000  | -4.559499000 |
| C | 7.514914000 | -0.121485000 | -3.056348000 |
| O | 8.528511000 | -0.235747000 | -2.450018000 |
| N | 6.360374000 | -0.313413000 | -2.472535000 |
| H | 5.603329000 | -0.134546000 | -3.116767000 |
| C | 6.186282000 | -0.503502000 | -1.054615000 |
| H | 6.695959000 | 0.353503000  | -0.613885000 |
| C | 4.684367000 | -0.524489000 | -0.667818000 |
| H | 4.256106000 | -1.499878000 | -0.894269000 |
| H | 4.602219000 | -0.355520000 | 0.406871000  |
| S | 3.599996000 | 0.728793000  | -1.467792000 |
| H | 1.974142000 | 0.308287000  | 0.522162000  |
| C | 6.734115000 | -1.852273000 | -0.580066000 |
| O | 6.638336000 | -2.886936000 | -1.306110000 |
| N | 7.403316000 | -1.866841000 | 0.568643000  |
| H | 7.512546000 | -0.972545000 | 1.023772000  |
| C | 8.282609000 | -2.923769000 | 0.974118000  |
| H | 8.344514000 | -3.112951000 | 2.045390000  |
| H | 7.831374000 | -3.878576000 | 0.701627000  |
| H | 9.322152000 | -2.953078000 | 0.647317000  |
| H | 5.728711000 | 2.387322000  | 2.983221000  |
| C | 4.656037000 | 2.242370000  | 2.854363000  |
| H | 4.449945000 | 1.195153000  | 2.627420000  |
| H | 4.073742000 | 2.380517000  | 3.765609000  |
| C | 3.992841000 | 3.055327000  | 1.703312000  |
| O | 3.310491000 | 2.482051000  | 0.936703000  |
| N | 4.201214000 | 4.362422000  | 1.536326000  |
| H | 4.887817000 | 4.840176000  | 2.102544000  |
| C | 3.520426000 | 5.138590000  | 0.487210000  |
| H | 3.434347000 | 4.515049000  | -0.402211000 |
| C | 2.061496000 | 5.461186000  | 0.904010000  |
| H | 1.521051000 | 5.780469000  | 0.007375000  |
| H | 1.594200000 | 4.529635000  | 1.228419000  |

|    |              |              |              |
|----|--------------|--------------|--------------|
| C  | 1.863661000  | 6.550997000  | 1.957633000  |
| H  | 2.349696000  | 7.482063000  | 1.658637000  |
| H  | 0.794542000  | 6.757983000  | 2.048497000  |
| S  | 2.502739000  | 6.220016000  | 3.642730000  |
| C  | 1.578403000  | 4.711147000  | 4.057114000  |
| H  | 0.504341000  | 4.872712000  | 3.945818000  |
| H  | 1.890455000  | 3.872679000  | 3.435445000  |
| H  | 1.797077000  | 4.478486000  | 5.100078000  |
| C  | 4.180524000  | 6.399056000  | -0.020327000 |
| O  | 4.921249000  | 6.959817000  | 0.809204000  |
| N  | 3.961634000  | 6.747455000  | -1.247815000 |
| H  | 3.493138000  | 6.114993000  | -1.881824000 |
| C  | 4.390220000  | 8.051522000  | -1.708259000 |
| H  | 5.301983000  | 8.309312000  | -1.169056000 |
| H  | 4.604976000  | 8.015264000  | -2.776279000 |
| H  | 3.615453000  | 8.795529000  | -1.522887000 |
| Se | 3.212159000  | -4.791500000 | -1.475265000 |
| Se | 2.683896000  | -0.370367000 | -3.185656000 |
| C  | 3.216456000  | -4.007077000 | 0.285910000  |
| C  | 4.406380000  | -3.893305000 | 1.025138000  |
| C  | 4.410836000  | -3.329796000 | 2.299022000  |
| C  | 3.225266000  | -2.873044000 | 2.876194000  |
| C  | 2.036796000  | -2.986107000 | 2.155402000  |
| C  | 2.031123000  | -3.537143000 | 0.874872000  |
| C  | 0.885599000  | -0.656557000 | -2.525094000 |
| C  | 0.041171000  | 0.429298000  | -2.275236000 |
| C  | -1.278008000 | 0.203837000  | -1.889014000 |
| C  | -1.765626000 | -1.099319000 | -1.779477000 |
| C  | -0.923735000 | -2.177269000 | -2.042938000 |
| C  | 0.407962000  | -1.962475000 | -2.401541000 |
| H  | 5.335688000  | -4.242017000 | 0.593976000  |
| H  | 5.346773000  | -3.253143000 | 2.842101000  |
| H  | 3.225517000  | -2.439974000 | 3.869622000  |
| H  | 1.106150000  | -2.640550000 | 2.588033000  |
| H  | 1.099033000  | -3.608822000 | 0.327707000  |
| H  | 0.410349000  | 1.441920000  | -2.380824000 |

|   |              |              |              |
|---|--------------|--------------|--------------|
| H | -1.926881000 | 1.046463000  | -1.681410000 |
| H | -2.791291000 | -1.275384000 | -1.478125000 |
| H | -1.297712000 | -3.189777000 | -1.961102000 |
| H | 1.068419000  | -2.803109000 | -2.576555000 |
